# Supplementary material
Source: publisher figshare collection journal article supplement (https://geolsoc.figshare.com/ndownloader/files/26290719)
Supplement: Supplementary file 1 [file 26290719]

## Sheet: Foglio1
Table S1 - Geographical location of the PS data tested through parametric and non-parametric analyses and results of the statistical tests
PS Ascending orbit							PS Descending orbit
Longitude	Latitude	Anova F-test	Lilliefors test	Durbin Watson test	Mann Kendall test		Longitude	Latitude	Anova F-test	Lilliefors test	Durbin Watson test	Mann Kendall test
13.3921	42.2243	0.248201	0.00376807	0.127641	0.0903485		13.4538	42.4214	0.275478	0.0653851	0.289549	0.228146
13.3921	42.2243	0.555839	0.00934952	0.0220492	0.370697		13.4552	42.4211	0.00976781	0.291141	0.849242	0.0312825
13.3912	42.2249	0.844048	0.273595	0.0549598	0.846528		13.4519	42.4212	0.0155117	0.352157	0.794475	0.0187217
13.4032	42.2268	0.345832	0.340008	0.292425	0.226399		13.4538	42.4203	0.0485007	0.5	0.59695	0.0504775
13.3881	42.2245	0.934324	0.5	0.723643	0.680857		13.4537	42.4203	0.257069	0.229517	0.200321	0.34297
13.3912	42.225	0.949342	0.5	0.0982636	0.903716		13.4537	42.4203	0.0247477	0.5	0.589161	0.0345197
13.388	42.2245	0.896197	0.5	0.234289	0.680857		13.4539	42.42	0.0022867	0.476956	0.174241	0.00219672
13.3891	42.2247	0.95807	0.0632533	0.537823	0.753127		13.4517	42.4204	0.150612	0.5	0.884916	0.185607
13.4045	42.2271	0.867182	0.00839241	0.227565	0.716675		13.4517	42.4203	0.0635797	0.5	0.0861875	0.0821098
13.4044	42.2272	0.766451	0.231101	0.0743041	0.771568		13.4547	42.4193	0.11157	0.5	0.0493432	0.0893078
13.3885	42.2247	0.284712	0.0591998	0.0297282	0.115813		13.4547	42.4193	0.030713	0.5	0.262636	0.0553164
13.3915	42.2252	0.648764	0.5	0.00846299	0.903716		13.4531	42.4194	0.639459	0.5	0.064124	0.751923
13.3885	42.2247	0.383086	0.144643	0.000447251	0.276278		13.4531	42.4193	0.398603	0.5	0.0382404	0.580138
13.3914	42.2252	0.533426	0.5	0.0130243	0.235822		13.4452	42.4201	0.0774614	0.5	0.314832	0.166678
13.3915	42.2252	0.412895	0.113411	0.00722706	0.309564		13.4452	42.4201	0.135688	0.186385	0.880611	0.0970055
13.3894	42.2249	0.729472	0.0216103	0.167426	0.482917		13.4453	42.42	0.0210943	0.5	0.650641	0.00534173
13.39	42.2251	0.104078	0.399966	0.148383	0.167881		13.4453	42.42	0.0156381	0.130094	0.983465	0.00417411
13.4048	42.2274	0.56245	0.0779389	0.0515978	0.628475		13.4454	42.4199	0.00202572	0.253704	0.331799	0.00168207
13.3901	42.2252	0.00711087	0.457289	0.403169	0.0215387		13.4454	42.4198	0.0024463	0.326435	0.182212	0.00179914
13.3902	42.2252	0.000152999	0.5	0.20284	0.000591436		13.4441	42.4199	0.0196203	0.5	0.0130954	0.0269163
13.4049	42.2276	0.648496	0.5	0.858411	0.680857		13.4534	42.4183	0.0050233	0.162555	0.46987	0.00392096
13.4036	42.2275	0.963689	0.272237	0.219653	0.942139		13.4469	42.4192	0.136855	0.271477	0.672768	0.113987
13.3891	42.2253	0.762113	0.172658	0.00561376	0.771568		13.4469	42.4192	0.30137	0.5	0.479014	0.38469
13.3889	42.2253	0.505865	0.170139	0.00337705	0.424642		13.4457	42.4194	3.80256e-05	0.5	0.759298	3.34122e-05
13.3891	42.2253	0.999142	0.5	0.00275803	0.628475		13.4469	42.4191	0.181083	0.0697536	0.0611061	0.251846
13.3889	42.2253	0.243445	0.254172	0.0179263	0.191395		13.4457	42.4193	0.000251704	0.055865	0.439324	0.000160976
13.389	42.2253	0.54614	0.401207	0.0116697	0.357906		13.4465	42.4192	0.0038566	0.201772	0.610854	0.00392096
13.4087	42.2284	0.243298	0.143583	0.0582358	0.0773718		13.4472	42.419	0.174848	0.47586	0.10589	0.113987
13.3857	42.2248	0.00359182	0.5	0.687208	0.00316094		13.4465	42.4191	0.18581	0.5	0.301016	0.353119
13.4087	42.2284	0.906581	0.29492	0.00593502	0.438813		13.4472	42.419	0.142586	0.5	0.164536	0.128197
13.3856	42.2249	0.000630242	0.15332	0.724996	0.000312312		13.4466	42.419	0.0507493	0.101378	0.109612	0.101049
13.4034	42.2276	0.125546	0.0340253	0.601804	0.0145428		13.4466	42.419	0.551006	0.406663	0.0246891	0.527251
13.4086	42.2285	0.982717	0.13986	0.235076	0.698682		13.4466	42.4189	0.0800458	0.281725	0.134506	0.143746
13.4086	42.2286	0.703318	0.5	0.35556	0.577899		13.4465	42.4189	0.355106	0.220358	0.265464	0.514424
13.3875	42.2254	0.790932	0.0765895	0.956109	0.611405		13.4465	42.4189	0.872714	0.5	0.0986464	0.984238
13.388	42.2255	0.974142	0.346811	0.0214165	0.942139		13.4465	42.4189	0.962995	0.256019	0.00977921	0.905641
13.4065	42.2284	0.930778	0.00616176	0.346145	0.942139		13.4478	42.4186	0.15085	0.5	0.645069	0.0970055
13.3864	42.2253	0.504798	0.00833451	0.419317	0.594544		13.4478	42.4186	0.0267882	0.0812867	0.00010065	0.0930928
13.388	42.2255	0.53837	0.00822102	0.0217621	0.513607		13.4484	42.4184	0.438079	0.5	0.12973	0.984238
13.4065	42.2284	0.371045	0.415438	0.820973	0.357906		13.4484	42.4184	0.0177328	0.5	0.02625	0.0418588
13.4035	42.228	0.744175	0.239363	0.0231655	0.961407		13.4463	42.4187	0.000196063	0.222244	0.230842	0.000348985
13.386	42.2253	0.944737	0.053993	0.94746	0.942139		13.4442	42.419	0.00294986	0.5	0.0172606	0.004442
13.3879	42.2256	0.116691	0.0269159	0.117793	0.199748		13.4441	42.419	0.00439964	0.486764	0.618715	0.00472537
13.4193	42.2305	0.940208	0.5	0.326186	0.942139		13.446	42.4186	7.57244e-06	0.5	0.109578	7.77265e-05
13.3878	42.2256	0.95647	0.5	0.00600059	0.594544		13.446	42.4186	2.75198e-05	0.5	0.0488838	0.000220347
13.3878	42.2256	0.360909	0.5	0.558929	0.424642		13.4454	42.4186	0.061987	0.0443122	0.0111057	0.0135277
13.3877	42.2257	0.813202	0.166626	0.0323759	0.922905		13.4455	42.4185	0.0574838	0.5	0.304712	0.0578773
13.388	42.2257	0.161659	0.5	0.212364	0.175465		13.4531	42.4173	0.60916	0.5	0.0977921	1
13.4067	42.2286	0.930206	0.123812	0.248917	0.482917		13.4454	42.4185	0.243253	0.368939	0.00822132	0.133227
13.4022	42.228	0.511303	0.209307	0.0138901	0.790138		13.4468	42.4182	0.501566	0.260146	0.337177	0.635388
13.3883	42.2259	0.968866	0.298505	0.355779	1		13.4454	42.4185	0.245974	0.0926295	0.0396017	0.228146
13.4167	42.2303	0.0208854	0.0645091	0.131692	0.00625903		13.4492	42.4178	0.000139879	0.5	0.924789	0.000348985
13.3882	42.2259	0.721491	0.5	0.550178	0.846528		13.4468	42.4181	0.249106	0.00251581	0.0881558	0.143746
13.4053	42.2286	0.17398	0.217116	0.00652346	0.370697		13.4532	42.4168	0.325695	0.5	0.616773	0.295056
13.4019	42.2281	0.851261	0.00774982	0.47051	0.345397		13.447	42.4178	0.343798	0.5	0.792153	0.37398
13.4117	42.2297	0.806153	0.253933	0.0360322	0.961407		13.4439	42.4184	0.00327741	0.5	0.571499	0.0135277
13.4186	42.2308	0.651721	0.0171279	0.969703	0.628475		13.4451	42.4179	0.13706	0.172943	0.140666	0.0459983
13.3874	42.226	0.0528727	0.479696	0.164201	0.0624738		13.4451	42.4179	0.00365959	0.0765371	0.106263	0.000969129
13.3842	42.2255	0.0683418	0.346117	0.0842592	0.121526		13.443	42.4182	0.0188017	0.123206	0.0221544	0.0481942
13.3874	42.226	0.421937	0.0489024	0.0580285	0.545283		13.4422	42.4182	0.508637	0.0698773	0.0302227	0.118579
13.4198	42.2311	0.305323	0.219977	0.928173	0.226399		13.4568	42.4156	0.0186385	0.450644	0.449991	0.0255828
13.3842	42.2255	0.0122831	0.238694	0.0305279	0.00464509		13.4568	42.4155	0.0269755	0.336406	0.351881	0.029764
13.4169	42.2306	0.71964	0.208873	0.0166998	0.922905		13.4502	42.4162	0.0268261	0.291863	0.0902969	0.0230865
13.4198	42.2311	0.863466	0.364251	0.778673	0.698682		13.4397	42.4176	0.0502704	0.5	0.124572	0.0578773
13.4013	42.2282	0.855984	0.0138355	0.00227493	0.370697		13.4397	42.4175	0.492937	0.5	0.0237789	0.452804
13.4023	42.2284	0.76616	0.157072	0.194654	0.545283		13.4457	42.4165	0.0150222	0.0983419	0.248701	0.0127987
13.4024	42.2284	0.503979	0.0564429	0.802607	0.321225		13.4457	42.4165	0.0189758	0.194418	0.86526	0.0255828
13.4071	42.2291	0.407323	0.130391	0.0113793	0.357906		13.4456	42.4164	0.313939	0.5	0.739173	0.268569
13.4168	42.2307	0.0453259	0.0309662	0.000151116	0.0312996		13.4571	42.4145	5.51773e-05	0.5	0.254456	0.000545433
13.4022	42.2284	0.596016	0.5	0.284961	0.453251		13.4456	42.4163	0.130118	0.308462	0.745767	0.101049
13.4023	42.2284	0.592469	0.114366	0.0203236	0.370697		13.4467	42.416	0.507328	0.0993528	0.394153	0.514424
13.4029	42.2285	0.460806	0.39923	0.0676155	0.884583		13.4467	42.416	0.442292	0.5	0.181543	0.37398
13.4036	42.2287	0.0379884	0.5	0.0375945	0.105022		13.4364	42.4169	0.696848	0.365657	0.880515	0.353119
13.4175	42.2308	0.662598	0.5	0.322398	0.577899		13.4364	42.4168	0.0569602	0.5	0.868045	0.0821098
13.3868	42.2261	0.679251	0.306207	0.000455327	0.645745		13.437	42.4165	0.0557518	0.218122	0.215573	0.0438874
13.4035	42.2287	0.545497	0.389399	0.003414	0.309564		13.44	42.4159	0.000608848	0.385285	0.0113377	0.00111481
13.4052	42.229	0.0637063	0.5	0.163234	0.0815173		13.4399	42.4159	0.927928	0.5	0.0443637	0.797306
13.4175	42.2309	0.325945	0.319098	0.137926	0.545283		13.4353	42.4166	0.140333	0.192966	0.231567	0.0438874
13.3858	42.226	0.913791	0.472629	0.000258682	0.884583		13.4373	42.4163	0.0536839	0.362388	0.423558	0.0345197
13.3868	42.2261	0.941273	0.23931	0.24676	0.922905		13.4399	42.4157	3.29633e-06	0.5	0.740122	6.06121e-06
13.3857	42.226	0.985893	0.156075	0.00313183	0.903716		13.4399	42.4157	0.356913	0.147941	0.341584	0.736976
13.3858	42.226	0.557909	0.398571	0.0508892	0.309564		13.4348	42.4165	0.000582355	0.5	0.0529067	0.000729183
13.3857	42.226	0.717574	0.27627	0.505839	0.922905		13.4347	42.4165	0.00141027	0.5	0.177756	0.00304184
13.3858	42.2261	0.226313	0.0432973	0.920659	0.217247		13.4428	42.4151	0.919454	0.344982	0.0281887	0.937012
13.4167	42.2309	0.421992	0.0687817	0.0339474	0.753127		13.4414	42.4153	0.12072	0.5	0.0151272	0.0632951
13.4167	42.2309	0.856738	0.0623637	0.00600704	0.397117		13.4384	42.4158	0.045638	0.5	0.112535	0.0345197
13.4171	42.231	0.0493048	0.126942	0.0727034	0.0950444		13.4428	42.415	0.831991	0.344667	0.156102	1
13.4227	42.2319	0.405821	0.0104862	0.187429	0.167881		13.4383	42.4157	0.00116239	0.443804	0.111463	0.000277766
13.3858	42.2262	0.775473	0.138833	0.211049	0.980698		13.4428	42.4149	0.263602	0.144552	1.11289e-05	0.766964
13.4146	42.2307	0.176235	0.421832	0.00157103	0.0260259		13.4336	42.4163	0.075221	0.5	0.215977	0.060536
13.4152	42.2308	1.45211e-05	0.220124	0.873166	0.000119668		13.4336	42.4163	0.241156	0.5	0.187618	0.228146
13.4171	42.2311	0.0018621	0.245022	0.0240088	0.00230054		13.4378	42.4156	0.00122321	0.267388	0.27731	0.000277766
13.3858	42.2262	0.27905	0.5	0.0387395	0.191395		13.4366	42.4158	0.396006	0.339081	0.0469218	0.185607
13.4146	42.2307	0.307211	0.178425	0.318902	0.199748		13.4339	42.4162	0.0192989	0.5	0.122801	0.0127987
13.3855	42.2263	0.17593	0.0208402	0.0122982	0.029448		13.4378	42.4155	0.0167175	0.5	0.858028	0.0230865
13.3867	42.2264	0.294725	0.5	0.118398	0.153456		13.4377	42.4156	0.0306284	0.5	0.294764	0.00965058
13.3855	42.2263	0.832352	0.0583135	0.0649251	1		13.4339	42.4162	0.00392796	0.5	0.332825	0.004442
13.4033	42.2291	0.497636	0.5	0.472102	0.645745		13.4403	42.4151	0.568598	0.5	0.0957491	0.566686
13.3881	42.2268	0.0306595	0.5	0.120837	0.0591452		13.4377	42.4155	0.034182	0.5	0.891355	0.0438874
13.4139	42.2308	0.20482	0.00865367	0.0296396	0.0421259		13.4366	42.4157	0.0498183	0.0920669	0.168715	0.038039
13.3814	42.2258	0.916342	0.0339402	0.00166117	0.133611		13.4431	42.4146	0.234921	0.5	0.128048	0.295056
13.3814	42.2258	0.642058	0.197275	0.340445	0.370697		13.4378	42.4154	0.258861	0.0267226	0.70515	0.41793
13.388	42.2269	0.555184	0.5	0.00179721	0.577899		13.4366	42.4156	0.334453	0.5	0.00339469	0.553385
13.4038	42.2294	0.735249	0.5	0.754944	1		13.4487	42.4135	0.632835	0.0873141	0.600676	0.649541
13.4069	42.2299	0.252409	0.184587	0.681589	0.298186		13.4441	42.4143	0.980209	0.5	0.90361	0.968481
13.4037	42.2294	0.313005	0.430575	0.543158	0.265746		13.4439	42.4141	0.773549	0.172949	0.574392	0.812596
13.3872	42.2268	0.990739	0.5	0.0435298	0.410743		13.4439	42.4141	0.470899	0.5	0.560732	0.593739
13.4037	42.2294	0.123927	0.5	0.683909	0.0950444		13.4421	42.4142	0.953631	0.112404	0.692956	0.968481
13.3824	42.2262	0.00870351	0.0264591	0.0643253	0.00091793		13.4364	42.415	0.00316447	0.5	0.126553	0.00534173
13.3823	42.2262	0.0135145	0.0291267	0.266333	0.00625903		13.4364	42.415	0.0583734	0.5	0.0985021	0.0345197
13.4043	42.2296	0.235543	0.5	0.079313	0.276278		13.4343	42.4153	0.399011	0.5	0.278937	0.295056
13.4043	42.2297	0.202006	0.466863	0.435283	0.561476		13.4348	42.4152	0.195989	0.0170054	0.0010583	0.109537
13.3824	42.2263	0.00366615	0.299654	0.103166	0.000591436		13.4402	42.4142	0.758338	0.5	0.931625	0.782094
13.4228	42.2327	0.0679043	0.392263	0.885032	0.0591452		13.4354	42.415	0.183902	0.5	0.371086	0.260114
13.4049	42.23	0.549009	0.023419	0.058367	0.498136		13.4403	42.4141	0.653199	0.5	0.542127	0.751923
13.4168	42.2319	0.936359	0.117737	0.409758	0.961407		13.4354	42.4149	0.158661	0.153717	0.492654	0.133227
13.4169	42.2319	0.405749	0.5	0.0701717	0.529325		13.4404	42.414	0.880841	0.5	0.791711	0.843385
13.4071	42.2305	0.00273575	0.367032	0.00797764	0.00249277		13.4405	42.414	0.782732	0.365196	0.467118	0.766964
13.4168	42.232	0.947464	0.0815039	0.71521	0.771568		13.4351	42.4148	0.00233457	0.341306	0.136859	0.00250491
13.4169	42.232	0.620241	0.0246424	0.00380441	0.357906		13.4351	42.4148	0.001818	0.5	0.199324	0.000545433
13.4169	42.232	0.656235	0.5	0.00958653	0.716675		13.4353	42.4147	0.794141	0.133334	0.541263	0.858873
13.4145	42.2317	0.902641	0.5	0.0230364	0.980698		13.435	42.4148	0.628531	0.00695911	0.0732253	0.766964
13.4045	42.2301	0.968245	0.368887	0.079458	0.498136		13.4352	42.4147	0.734261	0.431941	0.873481	0.736976
13.3809	42.2266	0.30988	0.122309	0.0128852	0.208365		13.4529	42.4118	0.0808482	0.2775	0.349795	0.17282
13.4173	42.2324	0.227655	0.219993	0.104271	0.167881		13.4529	42.4118	0.0646221	0.204154	0.800282	0.0553164
13.3806	42.2267	0.372922	0.00506015	0.185293	0.410743		13.4374	42.4142	0.637471	0.5	0.188231	0.621368
13.4173	42.2324	0.38399	0.290256	0.8378	0.790138		13.4446	42.4129	0.0713682	0.437813	0.314295	0.0578773
13.3805	42.2267	0.600464	0.288196	0.207435	0.333169		13.4446	42.4129	0.0322734	0.5	0.69931	0.0691253
13.4156	42.2322	0.511311	0.5	0.291277	0.716675		13.4375	42.4139	0.0271342	0.5	0.0664166	0.00811197
13.4483	42.2373	0.00178698	0.0211691	0.338054	0.000494165		13.4365	42.414	0.358171	0.0493165	0.0434577	0.133227
13.4156	42.2322	0.825601	0.426656	0.0715794	0.846528		13.4365	42.414	0.0718258	0.424783	0.101039	0.0504775
13.4127	42.2318	0.723691	0.0137378	0.0144618	0.594544		13.4355	42.4141	0.000392482	0.5	0.395312	0.00111481
13.4171	42.2325	0.202145	0.0729871	0.622517	0.345397		13.4385	42.4134	0.0466489	0.252847	0.0841015	0.0438874
13.3806	42.2268	0.883239	0.0700097	0.000946479	0.0446347		13.4404	42.413	0.310162	0.5	0.195586	0.553385
13.4128	42.2319	0.516353	0.350856	0.428962	0.160546		13.4394	42.4132	0.935849	0.5	0.430918	1
13.4172	42.2325	0.346922	0.5	0.85316	0.321225		13.4401	42.413	0.212144	0.146697	0.384265	0.105225
13.3812	42.2269	0.414023	0.0686819	0.0853861	0.482917		13.4394	42.4132	0.835525	0.5	0.858575	0.812596
13.3812	42.227	0.627059	0.5	0.267355	0.235822		13.4379	42.4134	0.00496212	0.5	0.321445	0.00567637
13.4185	42.2328	0.122073	0.161647	0.224409	0.410743		13.4379	42.4133	0.00519335	0.395298	0.0692344	0.00192365
13.3811	42.227	0.377262	0.00444157	0.300059	0.110313		13.4539	42.4107	0.589625	0.5	0.280338	0.553385
13.3812	42.227	0.438333	0.111843	0.0056627	0.133611		13.4569	42.4102	0.113607	0.205355	0.378788	0.101049
13.4185	42.2328	0.1354	0.001	0.25059	0.0446347		13.4354	42.4136	0.0768463	0.5	0.00820162	0.060536
13.4186	42.2328	0.915142	0.157718	0.164332	0.790138		13.4389	42.413	0.430123	0.255511	0.872407	0.635388
13.4185	42.2329	0.139348	0.086743	0.0579072	0.029448		13.4389	42.413	0.138825	0.202538	0.209115	0.105225
13.4186	42.2329	0.443368	0.00119985	0.33125	0.127457		13.4559	42.4102	0.0111293	0.247305	0.33925	0.00368183
13.4108	42.2317	0.234802	0.122148	0.773374	0.0659557		13.4406	42.4127	0.431209	0.5	0.335203	0.37398
13.3809	42.2271	0.583297	0.0954494	0.05765	0.333169		13.4559	42.4102	0.0651452	0.0271274	0.610881	0.029764
13.4109	42.2317	0.64438	0.5	0.276356	0.424642		13.4391	42.4129	0.184851	0.0303921	0.815265	0.228146
13.4191	42.2331	0.143867	0.405983	0.743223	0.467954		13.4411	42.4125	0.428483	0.187106	0.173481	0.260114
13.383	42.2275	0.824705	0.0438065	0.00427021	0.577899		13.4411	42.4124	0.000155017	0.389401	0.396505	0.000470691
13.4182	42.233	0.291602	0.0173792	0.0560909	0.24552		13.438	42.4129	0.0250691	0.5	0.900888	0.0219197
13.383	42.2275	0.108723	0.0319561	0.0133208	0.0127042		13.4296	42.4129	0.531522	0.5	0.385428	0.527251
13.4118	42.232	0.515282	0.0652499	0.137512	0.753127		13.456	42.4086	0.00323873	0.5	0.569483	0.00679673
13.3812	42.2273	0.219369	0.5	0.00237422	0.0773718		13.456	42.4085	0.0369193	0.5	0.576926	0.0345197
13.3829	42.2276	0.169904	0.0818388	0.423496	0.24552		13.4533	42.4087	0.621383	0.496257	0.0418949	0.937012
13.413	42.2323	0.695211	0.068614	0.0101895	0.498136		13.4533	42.4087	0.657738	0.165528	0.205559	0.766964
13.3829	42.2276	0.210239	0.0217231	0.0192222	0.121526		13.4536	42.4086	0.09008	0.0779775	0.0199269	0.038039
13.3833	42.2277	0.463524	0.5	0.83784	0.594544		13.4541	42.4083	0.263539	0.297774	0.113664	0.113987
13.415	42.2327	0.453097	0.284372	0.103166	0.438813		13.456	42.408	0.159379	0.5	0.265281	0.213256
13.4184	42.2332	0.153747	0.315183	0.0883817	0.199748		13.456	42.4079	0.332208	0.476032	0.993	0.20608
13.3832	42.2278	0.59183	0.235689	0.440094	0.561476		13.4346	42.4113	2.4379e-05	0.5	0.559976	0.000323537
13.415	42.2327	0.381921	0.00593302	0.151737	0.235822		13.4551	42.4079	0.0360724	0.0773819	0.438958	0.0230865
13.4151	42.2327	0.224856	0.317542	0.148581	0.276278		13.4537	42.408	0.0406134	0.0263071	0.340074	0.0102185
13.4184	42.2332	0.268538	0.250407	0.0407078	0.410743		13.4538	42.4079	0.0154197	0.060325	0.527675	0.0114442
13.4119	42.2326	0.0137325	0.0727626	0.787406	0.00212199		13.4532	42.4078	0.180738	0.403419	0.395145	0.476939
13.3802	42.2276	0.053184	0.41956	0.328224	0.0591452		13.4527	42.4078	0.618974	0.245155	0.467882	0.751923
13.4119	42.2326	0.231774	0.00744496	0.732476	0.069596		13.4486	42.4085	0.717202	0.0320602	0.32313	0.540239
13.3801	42.2277	0.09028	0.0650548	0.275704	0.0659557		13.4526	42.4077	0.953958	0.0949339	0.99151	0.843385
13.4111	42.2325	0.544676	0.5	0.443264	0.383768		13.4489	42.4083	0.914101	0.106932	0.500836	0.858873
13.4119	42.2327	0.190092	0.437401	0.087572	0.167881		13.4455	42.4088	0.0580013	0.034383	5.04229e-05	0.185607
13.3793	42.2276	0.724006	0.5	0.00467911	0.942139		13.4455	42.4088	0.00262942	0.5	0.503628	0.00285219
13.3802	42.2278	0.487835	0.0593536	0.0401945	0.217247		13.4455	42.4088	0.158021	0.5	0.231478	0.251846
13.4113	42.2326	0.0198648	0.5	0.348194	0.0215387		13.436	42.4103	0.00742356	0.0124091	0.325743	0.00234619
13.3802	42.2278	0.201788	0.00106088	0.0815253	0.133611		13.4361	42.4102	0.00047363	0.498312	0.236226	0.000174216
13.4113	42.2327	0.00743835	0.0956514	0.501311	0.0103314		13.4524	42.4076	0.526513	0.265761	0.391548	0.566686
13.4146	42.2332	0.894073	0.5	0.045108	0.827629		13.4363	42.4102	0.101406	0.0105185	0.872776	0.0753896
13.3799	42.2278	0.609117	0.0034434	0.0300185	0.846528		13.4361	42.4102	0.0191809	0.5	0.476146	0.00679673
13.3801	42.2278	0.284619	0.00343056	0.289137	0.235822		13.4524	42.4075	0.999764	0.317236	0.734603	0.921311
13.3802	42.2278	0.136293	0.0537836	0.837279	0.0397374		13.4517	42.4076	0.630001	0.124522	0.167638	0.464785
13.4113	42.2327	0.436309	0.5	0.0431038	0.217247		13.4521	42.4075	0.0164799	0.393317	0.7827	0.0127987
13.4146	42.2332	0.330934	0.5	0.499655	0.183302		13.4521	42.4074	0.0457728	0.5	0.364851	0.228146
13.3798	42.2278	0.202493	0.0146696	0.319697	0.0472684		13.4522	42.4074	0.26717	0.277561	0.412381	0.105225
13.4184	42.2339	0.181627	0.190472	0.416256	0.139993		13.4521	42.4074	0.0628456	0.277501	0.269298	0.0632951
13.3794	42.2278	0.0202302	0.5	0.0572622	0.0591452		13.4292	42.4111	0.527968	0.199517	0.350719	0.566686
13.4112	42.2328	0.0913024	0.5	0.280267	0.127457		13.4528	42.4073	0.75233	0.070819	0.565364	0.429375
13.3792	42.2278	0.392585	0.358638	0.405697	0.397117		13.4522	42.4073	0.247326	0.0202864	0.609821	0.123315
13.3794	42.2278	0.786057	0.016749	0.0166852	0.846528		13.4522	42.4073	0.613367	0.00373232	0.0888787	0.38469
13.3854	42.2288	0.741338	0.5	0.430971	0.453251		13.4292	42.4111	0.625445	0.5	0.722858	0.782094
13.4112	42.2328	0.000491565	0.5	0.0191989	0.000771198		13.4292	42.411	0.765954	0.5	0.109858	0.858873
13.4142	42.2333	0.159855	0.346986	0.801291	0.24552		13.4603	42.4055	0.231397	0.5	0.540102	0.363456
13.4147	42.2333	0.327555	0.5	0.000486252	0.410743		13.4543	42.4065	0.147859	0.144835	0.0292772	0.0691253
13.4112	42.2328	0.1726	0.427595	0.226215	0.146606		13.4541	42.4063	0.539607	0.415276	0.225223	0.41793
13.4142	42.2333	0.38078	0.5	0.264643	0.370697		13.4542	42.4063	0.0111977	0.171322	0.0955379	0.00534173
13.4145	42.2334	0.695311	0.377094	0.646686	0.827629		13.4517	42.4067	5.89482e-05	0.406505	0.294103	0.000203827
13.4146	42.2334	0.571419	0.329692	0.0295017	0.370697		13.4413	42.4083	0.051477	0.269015	0.522389	0.0893078
13.4165	42.2337	0.0966761	0.5	0.948043	0.153456		13.4216	42.4114	0.415707	0.291119	0.212022	0.38469
13.4652	42.2413	0.453481	0.0440492	0.0204864	0.115813		13.4546	42.406	0.233451	0.216924	0.675169	0.133227
13.3805	42.2281	0.00174852	0.260265	0.00220345	0.00195622		13.4545	42.406	0.116199	0.0292841	0.512277	0.038039
13.4112	42.2329	0.878459	0.0372348	0.0278996	1		13.431	42.4097	0.213571	0.344843	0.706286	0.0856477
13.4145	42.2334	0.643263	0.0836312	0.581428	0.716675		13.4596	42.4025	0.00173144	0.5	0.559299	0.00368183
13.4165	42.2337	0.167942	0.0308059	0.784993	0.0858411		13.4116	42.4102	0.406498	0.467602	0.69703	0.692747
13.3805	42.2281	0.0307514	0.0179432	0.00966335	0.0244478		13.4596	42.4024	0.000100654	0.294226	0.308822	0.000148687
13.4112	42.2329	0.531659	0.0121435	0.144892	0.121526		13.4133	42.4098	0.595578	0.454405	0.447421	0.489265
13.4163	42.2337	0.054138	0.00541668	0.0338269	0.029448		13.4654	42.4005	7.35766e-05	0.211833	0.756276	6.58461e-05
13.3803	42.2282	1.27328e-06	0.5	0.278353	1.06635e-05		13.4652	42.4004	0.414896	0.224897	0.0896381	0.527251
13.4163	42.2338	0.074345	0.0272382	0.108022	0.0773718		13.4644	42.4005	0.0102003	0.5	0.895503	0.0269163
13.4142	42.2335	0.808895	0.5	0.584119	0.753127		13.4652	42.4004	0.628148	0.5	0.296561	0.952737
13.4162	42.2338	0.930784	0.075264	0.296177	0.922905		13.4052	42.4094	0.532791	0.5	0.126617	0.692747
13.417	42.2339	0.424505	0.5	0.375671	0.255494		13.4113	42.4081	0.334344	0.0100496	0.573605	0.38469
13.417	42.2339	0.763148	0.5	0.10625	0.865516		13.459	42.4001	0.0643036	0.5	0.0893738	0.118579
13.4101	42.2329	0.887194	0.173752	0.374782	0.577899		13.4083	42.4081	0.838013	0.348332	0.0309508	0.766964
13.4142	42.2335	0.511729	0.5	0.158375	0.309564		13.424	42.4055	0.7218	0.111257	0.0999523	0.663821
13.417	42.234	0.914777	0.0980973	0.000980529	0.680857		13.4083	42.408	0.080303	0.5	0.104439	0.060536
13.417	42.234	0.852475	0.5	0.0276248	0.753127		13.4239	42.4055	0.344864	0.420873	0.0964156	0.313655
13.386	42.2292	0.311187	0.105804	0.0392799	0.105022		13.4175	42.4063	0.00744025	0.5	0.203029	0.0076502
13.4101	42.2329	0.454228	0.00671131	8.19586e-07	0.594544		13.4146	42.4067	0.617848	0.5	0.0310724	0.429375
13.4169	42.234	0.0140391	0.358002	0.841393	0.0145428		13.412	42.4071	0.965116	0.321157	0.00905086	0.968481
13.417	42.234	0.542851	0.5	0.0116721	0.321225		13.4155	42.4065	0.0830209	0.5	0.665858	0.105225
13.3799	42.2282	0.876287	0.187163	0.00110155	0.383768		13.4148	42.4066	0.0524107	0.5	0.232658	0.0418588
13.38	42.2283	0.594649	0.377887	0.0891669	0.716675		13.4107	42.4073	0.840873	0.0522576	0.0536003	0.782094
13.3803	42.2283	0.699113	0.5	0.0863995	1		13.4148	42.4066	0.0618149	0.5	0.129215	0.0930928
13.386	42.2292	0.557743	0.5	0.0568552	0.383768		13.4108	42.4072	0.770847	0.37555	0.0430343	0.621368
13.4064	42.2324	0.671702	0.315221	0.035644	0.771568		13.4123	42.4069	0.0387268	0.5	0.00230547	0.0661573
13.4101	42.233	0.516111	0.00508947	0.000408501	0.482917		13.4137	42.4066	0.0100141	0.379361	0.258849	0.0135277
13.4153	42.2338	0.329589	0.397279	0.359848	0.265746		13.4123	42.4069	0.0090092	0.5	0.198869	0.029764
13.4177	42.2341	0.579288	0.065754	0.00907377	0.265746		13.4253	42.4046	0.0591973	0.5	0.0278073	0.0691253
13.4152	42.2338	0.123099	0.5	0.000336934	0.0260259		13.4215	42.4052	0.382392	0.453637	0.305853	0.41793
13.4177	42.2342	0.942397	0.0142874	0.004427	0.698682		13.4202	42.4054	0.333813	0.5	0.450288	0.34297
13.4508	42.2393	0.83123	0.0265193	0.0235148	0.942139		13.4151	42.4062	0.157961	0.5	0.484565	0.295056
13.38	42.2283	0.922576	0.153797	0.0209263	0.628475		13.4151	42.4062	0.244308	0.145355	0.207798	0.260114
13.38	42.2284	0.0573335	0.082779	0.0279903	0.0155472		13.4107	42.4069	0.38754	0.0855977	0.185631	0.228146
13.4126	42.2335	0.763382	0.00740999	0.640405	0.663209		13.4214	42.4051	0.510156	0.5	0.0641973	0.580138
13.4152	42.2339	0.533787	0.5	0.744153	0.771568		13.4118	42.4067	0.0118152	0.406405	0.0225064	0.0127987
13.38	42.2284	0.0637762	0.340349	0.00905568	0.0202007		13.4109	42.4068	0.580231	0.5	0.490286	0.501761
13.4126	42.2335	0.00898722	0.303622	0.0344935	0.00129192		13.4108	42.4068	0.525438	0.0704793	0.0376089	0.635388
13.4111	42.2333	0.609348	0.5	0.000816343	0.410743		13.41	42.407	0.0925211	0.5	0.707356	0.0722018
13.4024	42.232	0.537103	0.5	0.331728	0.561476		13.412	42.4066	0.390847	0.0444106	0.512929	0.304261
13.4056	42.2325	0.312968	0.385057	0.546863	0.438813		13.4118	42.4066	0.114753	0.5	0.00510226	0.13841
13.4098	42.2332	0.106626	0.321541	0.222948	0.069596		13.4109	42.4068	0.309843	0.5	0.182701	0.192257
13.4109	42.2334	0.23956	0.334528	0.0159503	0.265746		13.4108	42.4068	0.415526	0.238165	0.357927	0.268569
13.4144	42.2339	0.609405	0.147978	0.0405163	0.545283		13.4237	42.4046	0.41305	0.0541038	0.681131	0.489265
13.466	42.242	0.170824	0.144043	0.087133	0.175465		13.4106	42.4067	0.112854	0.262317	0.00127281	0.15489
13.4109	42.2334	0.228987	0.0567306	0.101331	0.370697		13.4106	42.4067	0.00176057	0.124471	4.84961e-06	0.00721214
13.4126	42.2337	0.375227	0.0675478	0.0156474	0.410743		13.4148	42.4059	0.804951	0.5	0.298804	0.890007
13.4144	42.234	0.372994	0.00635019	0.120565	0.383768		13.4133	42.4061	0.463886	0.5	0.0234073	0.984238
13.4019	42.2321	0.798007	0.5	0.109518	0.167881		13.412	42.4063	0.00442691	0.499052	0.161527	0.00472537
13.4122	42.2337	0.20818	0.00476143	0.25943	0.0999338		13.4133	42.4061	0.27352	0.367512	0.367767	0.566686
13.4126	42.2337	0.549545	0.13211	0.380581	0.482917		13.4121	42.4063	0.169397	0.0616224	0.0727676	0.27721
13.4047	42.2325	0.407828	0.5	0.0398162	0.498136		13.4115	42.4064	0.380009	0.5	0.0123328	0.41793
13.4138	42.2339	0.434853	0.2253	0.0960486	0.160546		13.4682	42.3972	0.00183688	0.00937024	0.708344	0.00285219
13.4147	42.2341	0.485274	0.0920059	0.0668597	0.397117		13.4144	42.4059	0.448112	0.5	0.839075	0.464785
13.3839	42.2293	0.62238	0.270919	0.282824	0.345397		13.4115	42.4063	0.422101	0.5	0.37628	0.286039
13.4014	42.2321	0.956482	0.36502	0.485262	0.884583		13.4144	42.4058	0.671028	0.5	0.158732	0.663821
13.4017	42.2321	0.155606	0.5	0.0948718	0.191395		13.4134	42.4059	0.448065	0.352016	0.00707365	0.464785
13.4046	42.2326	0.830978	0.0840782	0.0834151	0.808829		13.4105	42.4063	0.0123177	0.0585393	0.791307	0.0060298
13.4104	42.2335	0.101536	0.0690508	0.527141	0.0773718		13.4108	42.4062	0.0288659	0.273304	0.407738	0.0691253
13.4147	42.2341	0.174602	0.238687	0.142049	0.146606		13.4124	42.4058	0.113193	0.5	0.180153	0.118579
13.4175	42.2346	0.0953239	0.114856	0.166054	0.276278		13.416	42.405	0.373867	0.5	0.180517	0.38469
13.384	42.2294	0.981725	0.159844	0.2084	0.645745		13.4598	42.3979	1.26696e-06	0.0142157	0.286662	8.78032e-06
13.4014	42.2321	0.480037	0.5	0.0474583	0.545283		13.4144	42.4052	0.664377	0.219848	0.0239342	0.782094
13.4016	42.2321	0.594581	0.5	0.0794384	0.645745		13.4599	42.3979	6.20041e-06	0.258233	0.122252	6.05715e-05
13.4021	42.2322	0.82506	0.25859	0.915819	0.922905		13.4576	42.3982	0.0159263	0.140817	0.953845	0.0177505
13.4105	42.2335	0.11389	0.0206418	0.0280822	0.121526		13.4129	42.4054	0.128432	0.373604	0.0711827	0.192257
13.4123	42.2338	0.172885	0.0622812	0.420176	0.146606		13.4124	42.4055	0.409607	0.5	0.0523633	0.41793
13.4125	42.2338	0.0696427	0.0763854	0.74071	0.0559653		13.4576	42.3982	1.96098e-05	0.0404347	0.559979	4.32119e-05
13.4136	42.234	0.0768227	0.5	0.401307	0.115813		13.4129	42.4054	0.252128	0.384642	0.168817	0.41793
13.4174	42.2346	0.0337824	0.485063	0.564884	0.052929		13.4124	42.4055	0.346847	0.0594591	0.0286643	0.464785
13.4174	42.2346	0.359252	0.0280831	0.00615713	0.513607		13.4575	42.3981	1.54688e-05	0.397774	0.18538	0.000220347
13.4013	42.2321	0.0625496	0.0455916	0.0802082	0.0446347		13.4575	42.398	0.00657742	0.263326	0.925357	0.0102185
13.4022	42.2322	0.587383	0.153189	0.972546	0.663209		13.4106	42.4056	0.042126	0.114251	0.0514336	0.060536
13.4106	42.2336	0.876186	0.0120518	0.0336747	0.734826		13.4628	42.3971	1.30805e-09	0.352487	0.146405	2.79612e-07
13.4124	42.2338	0.0388171	0.0422942	0.184435	0.0103314		13.4627	42.3971	3.9837e-08	0.5	0.845258	2.5756e-06
13.4136	42.234	0.659606	0.5	0.194809	0.922905		13.4589	42.3977	0.451061	0.5	0.836782	0.27721
13.4174	42.2346	0.467409	0.00340792	0.110141	0.208365		13.4107	42.4054	0.469479	0.5	0.0565764	0.429375
13.4636	42.2418	0.041872	0.286214	0.754103	0.0559653		13.4591	42.3976	0.037856	0.5	0.751069	0.0438874
13.4121	42.2338	0.52315	0.00112109	0.0219539	0.594544		13.459	42.3976	0.0952358	0.302049	0.788248	0.0553164
13.4124	42.2339	0.315964	0.5	0.255704	0.153456		13.4107	42.4054	0.498917	0.0682667	0.0149803	0.429375
13.4127	42.2339	0.307267	0.0669833	0.501101	0.716675		13.4591	42.3975	0.00117116	0.5	0.130568	0.004442
13.4146	42.2342	0.971652	0.0407506	0.647497	0.980698		13.4591	42.3975	0.000368838	0.0620684	0.0669347	0.000277766
13.4169	42.2346	0.934179	0.32776	0.0410448	0.734826		13.4588	42.3976	0.0174471	0.5	0.0258884	0.060536
13.4173	42.2346	0.657466	0.5	0.00562929	0.498136		13.4589	42.3975	0.00136891	0.480645	0.141819	0.00304184
13.4005	42.2321	0.843814	0.5	0.568966	0.903716		13.4644	42.3966	0.00976169	0.5	0.7724	0.0438874
13.4014	42.2322	0.0155321	0.5	0.345251	0.0260259		13.4588	42.3975	0.000909861	0.5	0.202353	0.00219672
13.4108	42.2337	0.339609	0.5	0.0537793	0.255494		13.4583	42.3976	0.000411159	0.113842	0.90174	0.00137163
13.4128	42.234	0.100904	0.454931	0.0457606	0.529325		13.4644	42.3965	0.0148961	0.5	0.0601047	0.0661573
13.4136	42.2341	0.135046	0.354998	0.402032	0.226399		13.4588	42.3974	0.0061482	0.5	0.284307	0.0255828
13.4146	42.2343	0.5369	0.0385437	0.581532	0.370697		13.4588	42.3975	0.00296985	0.5	0.359973	0.00859852
13.4169	42.2346	0.875346	0.292735	0.494699	0.827629		13.4583	42.3975	4.07235e-06	0.325201	0.608683	1.51375e-05
13.4022	42.2324	0.000213051	0.487901	0.0915327	0.00230054		13.4576	42.3976	0.00136847	0.289196	0.10495	0.004442
13.4108	42.2337	0.110885	0.00495208	0.147742	0.0332502		13.4644	42.3965	0.0054282	0.5	0.057894	0.101049
13.4121	42.2339	0.950953	0.428932	0.17094	0.903716		13.4595	42.3973	0.0281653	0.342488	0.832567	0.0230865
13.4127	42.234	0.95088	0.5	0.0839202	0.663209		13.4588	42.3974	0.000835349	0.5	0.082118	0.0197392
13.4128	42.234	0.905122	0.00354254	0.213389	0.345397		13.4583	42.3975	0.00643501	0.346337	0.162873	0.0142932
13.4135	42.2341	0.660652	0.0142508	0.0780006	0.903716		13.4576	42.3976	0.362081	0.0185987	0.0202923	0.27721
13.4139	42.2342	0.453885	0.453361	0.061114	0.345397		13.459	42.3973	0.560191	0.451803	0.00621006	0.707382
13.414	42.2342	0.0413061	0.133882	0.159324	0.0215387		13.4588	42.3974	0.000980296	0.202942	0.489207	0.0127987
13.4146	42.2343	0.449318	0.00475449	0.0341315	0.0999338		13.4575	42.3976	2.5134e-06	0.001	0.0508359	8.68217e-07
13.4169	42.2347	0.142856	0.467854	0.33223	0.0903485		13.459	42.3973	0.00140928	0.169531	0.0661881	0.00205603
13.4184	42.2349	0.00253398	0.5	0.0241352	0.0312996		13.4588	42.3973	0.043514	0.0750573	0.706588	0.0230865
13.4109	42.2337	0.643088	0.155108	0.062106	0.716675		13.4593	42.3972	0.13536	0.5	0.991319	0.128197
13.4114	42.2338	0.956513	0.224338	0.121203	0.370697		13.4591	42.3973	0.000873698	0.0130289	0.57263	0.00219672
13.4121	42.2339	0.786053	0.5	7.87727e-05	0.645745		13.4564	42.3977	0.0286051	0.00375063	0.0730519	0.00811197
13.4134	42.2341	0.286929	0.5	0.786938	0.321225		13.4593	42.3972	0.110039	0.167393	0.4225	0.160702
13.4137	42.2342	0.888048	0.0271677	0.0440413	0.298186		13.4591	42.3972	0.000916651	0.0159924	0.211774	0.0026734
13.4141	42.2342	0.182557	0.242506	0.31722	0.345397		13.4593	42.3971	0.00640005	0.166183	0.998524	0.029764
13.4146	42.2343	0.610687	0.00264484	0.684573	0.628475		13.4589	42.3972	0.000133158	0.5	0.841647	0.000277766
13.3796	42.2289	0.112252	0.208829	0.00538877	0.0624738		13.4594	42.3971	0.00256452	0.303507	0.997622	0.00368183
13.4109	42.2338	0.493612	0.5	0.306277	0.827629		13.457	42.3975	0.000892546	0.0155933	0.836127	0.00111481
13.4114	42.2339	0.975429	0.0599006	0.291426	0.513607		13.4594	42.397	0.000114181	0.325916	0.951736	0.000126711
13.4137	42.2342	0.312587	0.332112	0.0340133	0.0733997		13.4594	42.3971	0.10383	0.391459	0.624622	0.286039
13.414	42.2343	0.898861	0.5	0.0354299	0.865516		13.4569	42.3975	0.00121732	0.5	0.928651	0.0102185
13.4516	42.2401	0.4583	0.00345187	0.00114179	0.0177407		13.4568	42.3974	0.00885694	0.182262	0.0777941	0.0269163
13.3796	42.2289	0.086534	0.5	0.146821	0.133611		13.4112	42.4048	0.0834607	0.5	0.484522	0.123315
13.3808	42.2291	0.446684	0.5	0.0314132	0.734826		13.4581	42.3971	0.0170595	0.102408	0.613136	0.0208045
13.412	42.234	0.965301	0.001	0.0770531	0.498136		13.4592	42.3969	6.57315e-06	0.326456	0.0207823	9.94072e-05
13.4139	42.2343	0.242593	0.315866	0.0776787	0.0624738		13.4591	42.3969	0.130755	0.00691004	0.535004	0.105225
13.4508	42.2401	0.97222	0.0248863	0.00417804	0.865516		13.4581	42.397	1.06479e-06	0.5	0.129855	0.000160976
13.4509	42.2401	0.286878	0.115055	0.0247373	0.321225		13.4592	42.3968	8.33135e-06	0.146494	0.391453	3.96764e-05
13.4516	42.2402	0.0649872	0.0370702	0.0585217	0.00230054		13.4548	42.3975	0.0480633	0.5	0.242027	0.029764
13.4517	42.2402	0.483466	0.338503	0.280764	0.127457		13.4136	42.4042	0.368737	0.5	0.00338374	0.260114
13.4655	42.2423	0.0595355	0.5	0.0472741	0.0815173		13.4548	42.3975	0.344918	0.428248	0.0940291	0.621368
13.3808	42.2292	0.273221	0.193008	0.140747	0.0999338		13.4136	42.4042	0.218241	0.5	0.0199913	0.228146
13.4003	42.2322	0.542249	0.00262173	0.627681	0.545283		13.4589	42.3968	0.000106087	0.5	0.823566	0.00103961
13.4043	42.2328	0.566475	0.5	0.128498	0.645745		13.4574	42.397	0.00630757	0.5	0.860392	0.038039
13.412	42.234	0.779592	0.00136608	0.025024	0.922905		13.4574	42.397	0.00427784	0.5	0.111711	0.0243069
13.4121	42.2341	0.215318	0.445205	0.425962	0.191395		13.4568	42.3971	0.00747433	0.341206	0.131703	0.0269163
13.4132	42.2342	0.749763	0.00251425	0.0180953	0.577899		13.4464	42.3987	0.739993	0.5	0.923741	0.843385
13.4168	42.2348	0.764626	0.5	0.0188954	0.410743		13.4131	42.4041	0.179689	0.5	0.507269	0.441001
13.4508	42.2401	0.830468	0.153962	0.998435	0.808829		13.4598	42.3965	0.829391	0.5	0.952027	0.937012
13.4003	42.2322	0.933378	0.001	0.0231999	1		13.4595	42.3966	0.323243	0.5	0.404189	0.566686
13.4043	42.2329	0.345757	0.5	0.0230233	0.383768		13.4575	42.3969	0.0444941	0.0197448	0.034154	0.179128
13.4131	42.2343	0.122153	0.0509111	0.110131	0.287091		13.4594	42.3965	0.0392982	0.116653	0.316036	0.0930928
13.4133	42.2343	0.702329	0.00363573	0.0375228	0.276278		13.4575	42.3968	0.017169	0.5	0.0140252	0.0661573
13.4168	42.2348	0.758312	0.0996326	0.485423	0.827629		13.4127	42.4041	0.00274147	0.457312	0.620221	0.00965058
13.4118	42.2341	0.634385	0.5	0.30618	0.734826		13.4127	42.404	0.000487492	0.291152	0.325198	0.00219672
13.4133	42.2343	0.761004	0.5	0.0762109	0.513607		13.4127	42.404	8.35624e-05	0.5	0.186611	0.000903096
13.4167	42.2349	0.654409	0.225784	0.10249	0.183302		13.4602	42.3963	1.15306e-06	0.5	0.806456	3.64166e-05
13.4168	42.2349	0.722764	0.001	0.100529	0.265746		13.4582	42.3966	0.00238917	0.424599	0.678528	0.00567637
13.4708	42.2433	0.264974	0.0805699	0.0164551	0.146606		13.4574	42.3967	8.37598e-11	0.5	0.392654	2.26441e-07
13.3816	42.2294	0.430483	0.0711035	0.0441522	0.110313		13.4667	42.3952	0.024863	0.12542	0.140145	0.0578773
13.3846	42.2299	0.367254	0.001	2.44553e-06	0.110313		13.4601	42.3963	1.9685e-05	0.052959	0.313929	9.94072e-05
13.4118	42.2341	0.890801	0.0402623	0.0951098	0.680857		13.4587	42.3965	0.0129604	0.231457	0.734932	0.0114442
13.4133	42.2344	0.66804	0.001	0.0234566	0.734826		13.4582	42.3966	0.000314075	0.5	0.791738	0.00137163
13.414	42.2345	0.310287	0.101552	0.361184	0.183302		13.4574	42.3967	4.05971e-06	0.5	0.0440092	0.000116908
13.4167	42.2349	0.175671	0.0796875	0.500595	0.146606		13.4601	42.3962	0.000109448	0.360367	0.120514	0.000678503
13.3815	42.2294	0.102734	0.295251	0.011635	0.0421259		13.46	42.3962	1.06225e-05	0.414343	0.399762	9.16142e-05
13.3846	42.2299	0.917043	0.001	3.31242e-05	0.309564		13.46	42.3963	0.350532	0.5	0.963821	0.406667
13.4125	42.2343	0.213584	0.023357	0.263813	0.235822		13.4587	42.3965	0.0609816	0.5	0.5755	0.323238
13.4131	42.2344	0.405636	0.5	0.000324614	0.199748		13.4601	42.3962	0.000642924	0.3554	0.0691061	0.00472537
13.414	42.2345	0.300038	0.406108	0.33059	0.453251		13.413	42.4038	0.0203506	0.5	0.179988	0.0230865
13.4141	42.2345	0.784315	0.0868908	0.327983	0.903716		13.4642	42.3955	0.000148767	0.0703547	0.852537	0.00078336
13.4173	42.235	0.0300688	0.0730832	0.831486	0.0446347		13.4578	42.3965	0.00406015	0.111173	0.343752	0.0121047
13.3845	42.2299	0.0589189	0.246244	0.000459219	0.370697		13.4129	42.4038	0.238291	0.5	0.0286316	0.353119
13.4117	42.2342	0.128053	0.0491003	0.123031	0.0999338		13.4642	42.3955	9.61658e-06	0.5	0.304835	0.000148687
13.4125	42.2343	0.554553	0.249599	0.970621	0.698682		13.4593	42.3962	9.75055e-05	0.197765	0.218874	0.000437012
13.4117	42.2342	0.0496978	0.230383	0.0677041	0.029448		13.4577	42.3965	0.115871	0.386973	0.0685024	0.133227
13.4123	42.2343	0.190502	0.00186945	0.244695	0.513607		13.4593	42.3962	0.0168879	0.252969	0.344542	0.0177505
13.4125	42.2343	0.360629	0.114224	0.247621	0.208365		13.4601	42.396	0.562556	0.0610393	0.0374194	0.295056
13.4126	42.2343	0.112053	0.5	0.00325193	0.167881		13.4601	42.3961	1.28701e-05	0.5	0.172881	3.06442e-05
13.4514	42.2404	0.401594	0.001	0.776004	0.146606		13.459	42.3962	0.0226081	0.5	0.362262	0.0786913
13.463	42.2422	0.23962	0.5	0.292415	0.139993		13.4572	42.3965	5.81785e-05	0.160882	0.169389	0.000586819
13.4642	42.2424	0.235309	0.209656	0.387135	0.333169		13.4137	42.4035	0.636138	0.324448	0.267846	0.874416
13.4652	42.2425	0.857976	0.224202	0.0769528	0.922905		13.4604	42.396	0.0297003	0.5	0.731654	0.0187217
13.3793	42.2292	0.764656	0.19847	0.937308	0.698682		13.4601	42.396	5.82717e-08	0.5	0.0722711	3.43749e-06
13.3855	42.2302	0.980093	0.310254	0.000886023	1		13.4572	42.3965	0.00513667	0.23407	0.120565	0.00911101
13.4183	42.2353	0.820943	0.117841	0.0758813	0.922905		13.4138	42.4035	0.418061	0.442056	0.153096	0.429375
13.4641	42.2424	0.265281	0.5	0.0789662	0.438813		13.4138	42.4035	0.11456	0.0751772	0.0321491	0.235863
13.4109	42.2342	0.515155	0.241837	0.640734	0.498136		13.4604	42.3959	0.00703832	0.5	0.226928	0.0230865
13.4136	42.2346	0.382037	0.5	0.0362396	0.217247		13.4601	42.396	1.04662e-06	0.5	0.0724251	1.80968e-05
13.4183	42.2353	0.913913	0.5	0.073186	0.771568		13.4544	42.3969	7.68963e-05	0.351165	0.315268	0.00146869
13.4641	42.2424	0.333851	0.5	0.253364	0.397117		13.4137	42.4035	0.591585	0.5	0.0173641	0.395586
13.4654	42.2427	0.183021	0.5	0.0508885	0.127457		13.4574	42.3964	0.0345504	0.100284	0.908632	0.0970055
13.4658	42.2427	0.939276	0.300939	0.0185208	0.545283		13.4544	42.3969	0.00103022	0.0577925	0.252001	0.00285219
13.4152	42.2349	0.488796	0.5	0.172917	0.438813		13.4574	42.3963	6.56579e-05	0.373168	0.150136	0.000631114
13.4182	42.2353	0.37529	0.245372	0.201991	0.183302		13.4576	42.3963	0.680186	0.5	0.51362	0.736976
13.4515	42.2405	0.0733634	0.00425455	0.473129	0.0155472		13.4574	42.3963	0.00188464	0.5	0.0846423	0.0197392
13.4642	42.2425	0.353052	0.317152	0.022765	0.482917		13.4577	42.3962	0.00101725	0.5	0.42178	0.00811197
13.4661	42.2428	0.639962	0.110106	0.197876	0.513607		13.4576	42.3962	0.997213	0.0604954	0.38648	0.766964
13.38	42.2294	0.340421	0.5	0.213426	0.424642		13.4574	42.3963	0.517388	0.3193	0.609599	0.782094
13.3853	42.2302	0.313119	0.0605521	0.0957556	0.276278		13.4576	42.3962	0.137609	0.0911105	0.063984	0.304261
13.4152	42.2349	0.737327	0.272495	0.0283049	0.698682		13.4583	42.396	0.00192317	0.5	0.966281	0.0197392
13.4167	42.2351	0.552316	0.00698516	0.0359167	0.298186		13.4572	42.3962	0.0049824	0.115323	0.421707	0.004442
13.4179	42.2353	0.696205	0.220316	0.0197546	0.771568		13.4605	42.3956	0.128183	0.254703	0.174498	0.00965058
13.4633	42.2424	0.72971	0.16191	0.455493	0.846528		13.4604	42.3957	0.0168672	0.5	0.524236	0.0230865
13.4641	42.2425	0.33915	0.415095	0.185456	0.333169		13.4583	42.396	0.019344	0.0442321	0.0488278	0.0255828
13.4676	42.2431	0.63554	0.0624502	0.000321725	0.577899		13.4611	42.3955	0.00340336	0.192375	0.10702	0.00811197
13.3799	42.2294	0.162237	0.0209506	0.165711	0.410743		13.4605	42.3956	3.07966e-05	0.5	0.0126129	0.000188476
13.4099	42.2341	0.864508	0.5	0.28155	0.663209		13.4597	42.3957	7.9268e-06	0.5	0.19478	9.94072e-05
13.41	42.2341	0.766575	0.0643852	0.0647378	0.790138		13.4587	42.3959	0.000767838	0.5	0.975211	0.00368183
13.4115	42.2344	0.24835	0.367302	0.381542	0.226399		13.4596	42.3957	2.22103e-05	0.5	0.222765	9.16142e-05
13.4151	42.2349	0.886156	0.133679	0.600314	0.846528		13.4587	42.3959	8.61273e-05	0.5	0.0268663	0.00205603
13.4167	42.2352	0.345811	0.5	0.0196552	0.498136		13.4566	42.3962	0.0110213	0.5	0.0599402	0.0283093
13.4188	42.2355	0.85783	0.5	0.085431	0.628475		13.462	42.3953	0.0108215	0.141883	0.421085	0.0142932
13.4553	42.2412	0.764273	0.0149684	0.114629	0.942139		13.4603	42.3956	8.8818e-05	0.5	0.889929	0.000348985
13.4633	42.2424	0.568569	0.0358969	0.153013	0.545283		13.4587	42.3958	0.000208955	0.374212	0.540214	0.00168207
13.4671	42.243	0.758191	0.221079	0.111228	0.529325		13.4566	42.3962	0.00158193	0.0376775	0.0106776	0.000586819
13.4081	42.2339	0.372444	0.0236966	0.0455642	0.561476		13.413	42.4032	0.908516	0.348983	0.12089	0.874416
13.41	42.2342	0.811301	0.5	0.0689448	0.734826		13.462	42.3953	0.00589336	0.5	0.525408	0.0121047
13.4115	42.2344	0.0739361	0.001	0.0395079	0.00724201		13.4542	42.3965	0.686352	0.5	0.932323	0.464785
13.4167	42.2352	0.714198	0.0930608	0.0016825	0.397117		13.4616	42.3952	0.0839105	0.207468	0.134702	0.0821098
13.417	42.2353	0.0221833	0.133584	0.0147053	0.0446347		13.4542	42.3964	0.000186034	0.0441718	0.0422818	4.32119e-05
13.4553	42.2412	0.435289	0.17885	0.149972	0.438813		13.4616	42.3952	0.0470498	0.17089	0.262026	0.0553164
13.4708	42.2436	0.919605	0.0155452	0.148943	0.577899		13.4574	42.3959	0.00543361	0.5	0.0144123	0.0197392
13.409	42.2341	0.960017	0.155732	0.194778	0.482917		13.4635	42.3948	0.00668179	0.5	0.274017	0.038039
13.41	42.2342	0.423031	0.297002	0.24555	0.698682		13.462	42.3951	0.0221487	0.5	0.297195	0.101049
13.4123	42.2346	0.99138	0.111258	0.0361739	0.942139		13.4635	42.3948	0.000512553	0.419397	0.899144	0.00234619
13.4157	42.2351	0.0893018	0.105714	0.0152149	0.345397		13.462	42.395	0.0483585	0.239194	0.364197	0.0578773
13.4627	42.2424	0.554866	0.5	0.0188676	0.645745		13.4567	42.3959	0.22263	0.5	0.319816	0.313655
13.4707	42.2437	0.214748	0.5	0.99682	0.298186		13.4546	42.3962	0.528577	0.17794	0.817843	0.464785
13.4746	42.2443	0.542541	0.001	0.000112408	0.226399		13.4635	42.3948	1.93951e-05	0.00827665	0.0686534	6.58461e-05
13.4747	42.2443	0.17221	0.00459419	0.0368941	0.0559653		13.4586	42.3955	0.200286	0.5	0.0571961	0.260114
13.4091	42.2341	0.21912	0.105081	0.0374037	0.611405		13.4567	42.3958	0.0234329	0.5	0.251893	0.0345197
13.4123	42.2346	0.873461	0.0147609	0.103884	0.884583		13.4566	42.3959	0.0506345	0.5	0.8025	0.0553164
13.4627	42.2425	0.283195	0.378314	0.26214	0.438813		13.4635	42.3947	0.0281978	0.5	0.0545355	0.0459983
13.3815	42.2298	0.72003	0.0737542	0.0158149	0.980698		13.4611	42.3951	2.56874e-05	0.5	0.0974107	0.000348985
13.3819	42.2299	0.809862	0.0757221	0.0762265	0.716675		13.4633	42.3947	0.000263677	0.5	0.542751	0.00234619
13.382	42.2299	0.646766	0.5	0.585637	0.663209		13.4613	42.395	0.0753916	0.159859	0.336313	0.0459983
13.3855	42.2305	0.556955	0.0139924	0.0480683	0.482917		13.46	42.3952	0.000630889	0.370623	0.860295	0.00368183
13.4122	42.2346	0.611828	0.387111	0.672562	0.498136		13.4579	42.3956	0.00102566	0.5	0.435843	0.00345604
13.4123	42.2346	0.635785	0.187566	0.00920584	0.397117		13.4552	42.396	0.694045	0.5	0.0093652	0.952737
13.416	42.2352	0.307954	0.5	0.534857	0.357906		13.4209	42.4016	0.498389	0.5	0.181221	0.540239
13.4179	42.2355	0.785472	0.5	0.00544853	0.217247		13.4633	42.3947	0.00359279	0.5	0.67715	0.0114442
13.4189	42.2357	0.348508	0.0112236	0.228885	0.309564		13.4617	42.3949	6.90649e-06	0.306407	0.0930626	9.94072e-05
13.382	42.2299	0.783439	0.261043	0.476271	0.827629		13.4612	42.395	1.73981e-05	0.0626532	0.0457259	0.000903096
13.3825	42.23	0.30905	0.380038	0.00520145	0.255494		13.46	42.3952	6.11386e-06	0.5	0.0844043	0.000148687
13.3855	42.2305	0.292257	0.00206027	0.0623088	0.191395		13.46	42.3952	0.263141	0.341308	0.00528261	0.937012
13.416	42.2353	0.0961562	0.173037	0.00459656	0.00539783		13.46	42.3952	6.65632e-09	0.293948	0.334989	3.10535e-07
13.4174	42.2355	0.956574	0.001	0.0651727	0.424642		13.4552	42.396	0.00203388	0.461063	0.343969	0.00965058
13.4179	42.2356	0.28433	0.5	0.250784	0.827629		13.4209	42.4015	0.988179	0.0321138	0.00573611	1
13.4672	42.2432	0.86211	0.0829069	0.0296558	0.482917		13.4632	42.3947	0.0122789	0.371017	0.342734	0.0187217
13.4673	42.2432	0.956976	0.0938606	0.0316937	0.561476		13.4617	42.3949	5.57523e-08	0.163947	0.0197155	1.58006e-06
13.3777	42.2293	0.0571981	0.421126	0.0206766	0.0177407		13.4612	42.395	3.54922e-05	0.0744856	0.0312084	0.00137163
13.382	42.23	0.363496	0.5	0.0868663	0.577899		13.46	42.3952	0.0910843	0.5	0.0822589	0.406667
13.3825	42.2301	0.0277517	0.273834	0.127901	0.069596		13.4577	42.3955	0.0361413	0.5	0.177219	0.0632951
13.4022	42.2331	0.409128	0.435377	0.101711	0.467954		13.4558	42.3958	0.0008931	0.0502445	0.501108	0.00192365
13.4151	42.2352	0.860389	0.0331362	0.497358	0.865516		13.4552	42.396	0.00116843	0.264764	0.136374	0.00679673
13.4174	42.2355	0.353011	0.5	0.289429	0.357906		13.4209	42.4015	0.803933	0.0546261	0.0026793	0.707382
13.4199	42.2359	0.672726	0.313009	0.332833	0.357906		13.4601	42.3951	0.0317894	0.38564	0.641025	0.105225
13.4672	42.2433	0.567313	0.0330325	0.00288186	0.594544		13.4589	42.3953	2.0622e-06	0.5	0.320679	7.77265e-05
13.4672	42.2433	0.543619	0.0786713	0.0863741	0.753127		13.4577	42.3955	0.0402092	0.5	0.367603	0.060536
13.4022	42.2332	0.487995	0.5	0.0344939	0.753127		13.4551	42.3959	0.0481375	0.5	0.0852137	0.166678
13.4064	42.2338	0.867951	0.382221	0.252482	0.903716		13.4589	42.3953	2.61592e-05	0.184087	0.0568543	0.000376296
13.4139	42.235	0.363198	0.324556	0.0638788	0.438813		13.4551	42.3959	0.802926	0.16611	0.921168	0.501761
13.4166	42.2354	0.696063	0.5	0.0543037	0.663209		13.4486	42.3969	0.15311	0.5	0.460226	0.199081
13.4174	42.2355	0.0605271	0.5	0.396808	0.0397374		13.4159	42.4022	0.0914226	0.377505	0.0990284	0.0553164
13.4178	42.2356	0.492001	0.293377	0.457906	0.628475		13.4159	42.4021	0.011723	0.5	0.414971	0.0150967
13.4199	42.2359	0.740728	0.5	0.0802744	0.827629		13.4647	42.3942	7.63381e-09	0.5	0.394575	5.21698e-07
13.462	42.2425	0.400048	0.147545	0.339219	0.217247		13.4587	42.3951	0.0937213	0.5	0.886675	0.0553164
13.408	42.2341	0.0586704	0.0779635	0.527386	0.0332502		13.4633	42.3943	6.80435e-07	0.5	0.231112	3.64166e-05
13.4138	42.235	0.880401	0.237068	0.0308752	0.827629		13.4586	42.395	4.61918e-05	0.5	0.0607843	0.00128051
13.4159	42.2354	0.188563	0.0760501	0.00516738	0.321225		13.4577	42.3952	0.151599	0.245686	0.0712304	0.313655
13.4166	42.2355	0.143733	0.5	0.177243	0.0353039		13.4586	42.395	0.00837881	0.386638	0.137142	0.101049
13.4171	42.2355	0.131674	0.166077	0.375818	0.0500316		13.4576	42.3951	0.661322	0.462882	0.12978	0.41793
13.4178	42.2356	0.587539	0.5	0.247585	0.383768		13.4586	42.3949	0.00826181	0.121202	0.304496	0.0243069
13.4614	42.2424	0.379823	0.00796652	0.0497064	0.121526		13.4556	42.3954	0.0242314	0.418845	0.113106	0.0528507
13.462	42.2425	0.630393	0.173752	0.108983	0.498136		13.4556	42.3954	2.72873e-06	0.0349115	0.187897	0.000148687
13.4159	42.2354	0.0325461	0.143476	0.0479293	0.0177407		13.4557	42.3953	1.35601e-05	0.5	0.0435189	0.000238117
13.417	42.2356	0.288773	0.344919	0.0561286	0.370697		13.4585	42.3948	2.77729e-05	0.5	0.172951	9.94072e-05
13.4178	42.2357	0.0555997	0.416623	0.0162575	0.0260259		13.4557	42.3953	2.20953e-07	0.0459461	0.0783336	6.05715e-05
13.418	42.2357	0.550209	0.134322	0.959151	0.663209		13.4585	42.3948	0.194552	0.412694	0.703277	0.185607
13.4472	42.2403	0.147576	0.0826332	0.142895	0.0202007		13.4585	42.3948	0.0109415	0.488773	0.0289139	0.0255828
13.462	42.2426	0.527237	0.00786394	0.265777	0.321225		13.4585	42.3947	0.0375727	0.5	0.166323	0.0578773
13.3935	42.2319	0.103575	0.478894	0.095393	0.0858411		13.4402	42.3976	0.217386	0.33785	0.127671	0.38469
13.4105	42.2346	0.140588	0.174237	0.0294935	0.0858411		13.4402	42.3975	0.701144	0.5	0.105203	1
13.4142	42.2352	0.864142	0.00144969	0.000697788	0.645745		13.4486	42.396	0.491046	0.342059	0.541863	0.34297
13.4178	42.2357	0.0077198	0.153619	7.3224e-05	0.000706294		13.4486	42.396	0.0285124	0.0431208	0.504005	0.0142932
13.4179	42.2357	0.384259	0.0217622	0.00609642	0.265746		13.4578	42.3942	3.3031e-06	0.5	0.412758	1.97757e-05
13.3817	42.2301	0.421533	0.0899414	0.000263041	0.133611		13.4577	42.3942	0.000581302	0.206663	0.75857	0.000729183
13.3935	42.232	0.0250805	0.269789	0.49642	0.0189358		13.4409	42.3968	0.0192572	0.377267	0.413315	0.00721214
13.4159	42.2355	0.798525	0.5	0.0226797	0.980698		13.4407	42.3968	0.814202	0.113217	0.0246025	0.858873
13.4178	42.2358	3.29851e-05	0.0199337	0.000484006	1.19188e-05		13.4407	42.3968	0.163297	0.0314462	0.0439044	0.192257
13.4696	42.2438	0.507601	0.116144	0.00123375	0.438813		13.4116	42.4014	0.154642	0.0458573	0.0737026	0.143746
13.3936	42.232	0.0334718	0.5	0.382224	0.029448		13.4411	42.3966	0.928648	0.5	0.199256	0.722127
13.4063	42.234	0.497152	0.00662635	0.749456	0.321225		13.4116	42.4014	0.167454	0.001	0.0154541	0.0661573
13.4159	42.2355	0.391792	0.0262022	0.347711	0.438813		13.4116	42.4014	0.195165	0.0254679	0.0163339	0.123315
13.4177	42.2358	0.612405	0.5	0.144278	0.771568		13.4418	42.3964	0.832962	0.356839	0.958138	0.766964
13.4734	42.2445	0.649001	0.0822449	0.0243057	0.734826		13.4418	42.3964	0.89381	0.5	0.218676	0.905641
13.4159	42.2355	0.0163878	0.0514189	0.0245932	0.110313		13.4414	42.3965	0.00591157	0.5	0.626837	0.00219672
13.4178	42.2358	0.57042	0.119811	0.220444	0.321225		13.4115	42.4013	0.000148219	0.463407	0.60943	0.000545433
13.3792	42.2298	0.828064	0.327375	0.321651	0.545283		13.4415	42.3964	0.409851	0.427924	0.18466	0.707382
13.384	42.2306	0.118615	0.195644	0.0192272	0.0624738		13.4414	42.3964	0.0336255	0.5	0.00125375	0.032867
13.414	42.2353	0.219578	0.0201037	0.00256686	0.0624738		13.4416	42.3962	0.129365	0.182832	0.926733	0.0821098
13.4158	42.2356	0.110686	0.316998	0.22093	0.0472684		13.4415	42.3963	0.350425	0.5	0.718301	0.353119
13.3793	42.2299	0.177203	0.428833	0.598856	0.370697		13.4155	42.4002	0.042308	0.5	0.0150659	0.0255828
13.414	42.2353	0.552361	0.5	0.00496479	0.453251		13.4155	42.4002	0.170302	0.5	0.0123354	0.251846
13.4153	42.2355	0.649792	0.031731	0.317201	0.529325		13.4155	42.4002	0.0224278	0.5	0.0453979	0.0283093
13.4158	42.2356	0.0880978	0.354832	0.116984	0.0815173		13.4155	42.4002	0.31154	0.5	0.00214982	0.363456
13.4176	42.2359	0.149271	0.371125	0.431619	0.146606		13.4154	42.4001	0.0937466	0.5	0.0830723	0.123315
13.4665	42.2435	0.432686	0.0502979	0.174667	0.357906		13.4166	42.3998	0.0147802	0.5	0.0415929	0.0102185
13.3792	42.2299	0.716896	0.118516	0.0973882	0.827629		13.4166	42.3998	0.0923554	0.182305	0.0600665	0.0578773
13.3793	42.2299	0.0982171	0.184152	0.495258	0.139993		13.4161	42.3995	0.988793	0.5	0.0221059	1
13.4024	42.2335	0.524962	0.5	0.124744	0.424642		13.416	42.3995	0.526003	0.0622574	0.250914	0.692747
13.4025	42.2336	0.681126	0.450144	0.0219208	0.561476		13.4133	42.3999	0.914477	0.405262	0.183353	0.621368
13.4154	42.2356	0.733569	0.5	0.402947	0.846528		13.4161	42.3994	0.676088	0.5	0.00502693	0.874416
13.4175	42.2359	0.0758379	0.5	0.0692222	0.160546		13.4161	42.3994	0.230618	0.381472	0.0506429	0.123315
13.4665	42.2435	0.493981	0.123633	0.0743651	0.529325		13.4141	42.3997	0.878724	0.100105	0.00583209	0.858873
13.3793	42.23	0.0391362	0.0177816	0.383138	0.0229532		13.4161	42.3993	0.565523	0.29128	0.0551463	0.580138
13.3794	42.23	0.548823	0.5	0.958763	0.498136		13.415	42.3995	0.655765	0.136256	0.602605	0.41793
13.3829	42.2306	0.385538	0.496255	0.0118499	0.309564		13.4141	42.3997	0.95845	0.296134	0.00150244	0.707382
13.4151	42.2356	0.367673	0.5	0.0661907	0.753127		13.414	42.3997	0.451612	0.5	0.000196636	0.452804
13.4165	42.2358	0.142419	0.5	0.0687672	0.105022		13.4431	42.3949	0.00181321	0.5	0.884472	0.00392096
13.4166	42.2359	0.246695	0.5	0.207601	0.309564		13.4156	42.3993	0.0183856	0.233384	0.307354	0.0142932
13.4704	42.2443	0.311273	0.177602	0.00277233	0.482917		13.4433	42.3948	0.337024	0.0781796	0.0898324	0.363456
13.4067	42.2344	0.43342	0.5	0.113553	0.529325		13.443	42.3949	0.621614	0.5	0.94639	0.874416
13.4068	42.2344	0.0425995	0.218522	0.943438	0.0397374		13.4159	42.3992	0.256759	0.388083	0.0239251	0.149239
13.4073	42.2345	0.987421	0.362711	0.189162	0.942139		13.4156	42.3993	0.626454	0.340465	0.252257	0.692747
13.4075	42.2345	0.984348	0.5	0.045613	0.922905		13.4432	42.3948	0.362891	0.0344838	0.23586	0.501761
13.4937	42.2479	0.591298	0.412588	0.0017586	0.370697		13.4161	42.3992	0.422208	0.5	0.366431	0.621368
13.3825	42.2306	0.227675	0.00933149	0.00722925	0.513607		13.4354	42.396	0.782296	0.5	0.168357	0.441001
13.4067	42.2344	0.476876	0.0144224	0.0849636	0.645745		13.4159	42.3991	0.619267	0.5	0.00339598	0.782094
13.4068	42.2344	0.502059	0.31298	0.228767	0.561476		13.4141	42.3993	0.536249	0.189294	0.00332859	0.464785
13.4073	42.2345	0.0974532	0.5	0.534376	0.146606		13.4159	42.399	0.432986	0.5	0.014185	0.429375
13.4075	42.2345	0.46045	0.256831	0.266587	0.321225		13.4412	42.3949	0.218014	0.311319	0.195651	0.0856477
13.4162	42.2359	0.735233	0.155359	0.569935	0.438813		13.4161	42.3989	0.747025	0.251038	0.0287734	0.395586
13.4162	42.2359	0.379026	0.5	0.270515	0.438813		13.4159	42.399	0.76187	0.5	0.0977238	0.905641
13.3825	42.2306	0.0838826	0.152325	0.00269392	0.0999338		13.4357	42.3957	0.300261	0.113571	0.466653	0.514424
13.4066	42.2344	0.467748	0.109028	0.389509	0.482917		13.418	42.3986	0.00120798	0.279962	0.391368	0.0060298
13.4067	42.2344	0.8255	0.223959	0.0613576	0.698682		13.4159	42.3989	0.399606	0.338378	0.0641576	0.295056
13.4068	42.2344	0.192575	0.331795	0.00348135	0.110313		13.418	42.3986	0.000215481	0.5	0.169008	0.000160976
13.4073	42.2345	0.00895041	0.153281	0.447952	0.00500869		13.4167	42.3987	0.0647195	0.0669758	0.0131488	0.123315
13.4075	42.2346	0.0751664	0.5	0.00446713	0.052929		13.4157	42.3989	0.0100969	0.494062	0.00038545	0.0142932
13.4141	42.2356	0.690261	0.0148623	0.00291252	0.903716		13.4184	42.3984	0.129723	0.173514	3.36651e-05	0.118579
13.4143	42.2356	0.828232	0.5	0.0205238	0.827629		13.4166	42.3987	0.067562	0.0257402	0.00428182	0.0753896
13.3879	42.2315	0.13147	0.5	0.755686	0.121526		13.4162	42.3988	0.307754	0.5	0.103509	0.323238
13.4031	42.2339	0.414477	0.5	0.483522	0.716675		13.4618	42.3914	0.000722348	0.5	0.225586	0.004442
13.4065	42.2344	0.148343	0.5	0.187774	0.24552		13.4184	42.3984	0.500779	0.253292	0.00770916	0.766964
13.4925	42.2478	0.618555	0.328302	0.0850248	0.467954		13.4166	42.3987	0.59111	0.286278	0.0196921	0.527251
13.3828	42.2308	0.465858	0.0218914	0.161269	0.357906		13.4162	42.3987	0.942664	0.219545	0.0640871	0.736976
13.3972	42.233	0.0125413	0.5	0.659547	0.0215387		13.416	42.3988	0.479117	0.5	0.191818	0.41793
13.4925	42.2479	0.45704	0.0346786	0.239359	0.276278		13.4154	42.3989	0.878807	0.5	0.141556	0.782094
13.4075	42.2347	0.0261993	0.01618	0.0202102	0.00500869		13.4063	42.4003	0.0214837	0.5	0.0220727	0.00811197
13.4173	42.2362	0.533793	0.328671	0.0046126	0.529325		13.4183	42.3984	0.176332	0.249761	0.00904596	0.185607
13.4818	42.2463	0.0874885	0.127566	7.41431e-05	0.146606		13.4162	42.3987	0.477761	0.5	0.0284632	0.464785
13.4075	42.2347	0.000980811	0.0808254	0.241758	0.00180242		13.416	42.3987	0.527987	0.296467	0.0386521	0.692747
13.4156	42.236	0.447519	0.0269369	0.0040632	0.438813		13.4153	42.3988	0.616284	0.142135	0.011623	0.501761
13.4172	42.2362	0.153908	0.447282	0.445156	0.0950444		13.4166	42.3986	0.0025755	0.5	0.21965	0.00192365
13.4563	42.2423	0.303262	0.5	0.536687	0.345397		13.416	42.3987	0.497797	0.251445	0.00974144	0.566686
13.4564	42.2423	0.316023	0.5	0.33204	0.217247		13.4183	42.3983	0.179523	0.5	0.0738561	0.27721
13.4927	42.248	0.571849	0.013836	0.034309	0.217247		13.4166	42.3986	0.111859	0.0681676	0.0954395	0.0459983
13.4151	42.2359	0.404276	0.037452	0.0571464	0.545283		13.4159	42.3987	0.230251	0.246141	0.00787634	0.220611
13.4156	42.236	0.821381	0.412089	0.0322886	0.357906		13.461	42.3913	7.57375e-07	0.174231	0.557429	2.57483e-05
13.4199	42.2367	0.207453	0.00344581	0.00381972	0.0858411		13.4166	42.3985	0.491894	0.471415	0.00137724	0.635388
13.4927	42.248	0.868196	0.0126086	0.0592281	0.255494		13.416	42.3986	0.0870653	0.5	0.0336834	0.0856477
13.494	42.2482	0.0192492	0.5	0.0218069	0.0421259		13.4159	42.3986	0.532961	0.388152	0.0305088	0.649541
13.4093	42.2351	0.449243	0.5	0.00987142	0.410743		13.4611	42.3913	0.000231153	0.0451263	0.552693	0.000437012
13.4131	42.2357	0.381497	0.0320824	0.0458584	0.0624738		13.4363	42.3953	0.05731	0.5	0.0681029	0.0722018
13.4151	42.236	0.0523288	0.336923	0.00271954	0.0332502		13.416	42.3986	0.642001	0.5	0.0216584	0.782094
13.4926	42.2481	0.217494	0.0298862	0.0513095	0.0202007		13.4611	42.3913	0.017418	0.5	0.501123	0.036243
13.4133	42.2357	0.307488	0.5	0.130175	0.594544		13.4363	42.3953	0.00241854	0.5	0.286081	0.00911101
13.4165	42.2362	0.941526	0.5	0.0812733	0.827629		13.415	42.3987	0.794342	0.0456628	0.0701797	0.607483
13.4957	42.2486	0.0165518	0.0598337	0.186793	0.00673442		13.415	42.3987	0.930168	0.2841	0.0142396	0.621368
13.4033	42.2342	0.272666	0.0267818	0.0534698	0.139993		13.4089	42.3996	0.0508342	0.134893	0.156414	0.0108159
13.412	42.2356	0.100897	0.5	0.353283	0.183302		13.4412	42.3944	1.5083e-05	0.5	0.450522	0.000545433
13.4661	42.244	0.518626	0.194157	0.179067	0.410743		13.4145	42.3987	0.239442	0.137004	0.0706405	0.15489
13.4956	42.2486	0.936455	0.00351632	0.154427	0.513607		13.409	42.3996	0.0236804	0.172228	0.00607594	0.0142932
13.4063	42.2347	0.744889	0.5	0.0339013	0.545283		13.4412	42.3943	0.395871	0.390468	0.6203	0.27721
13.412	42.2356	0.419872	0.125695	0.387998	0.397117		13.4147	42.3986	0.951561	0.5	0.0192701	0.797306
13.4154	42.2361	0.202389	0.5	0.000237181	0.217247		13.4088	42.3996	0.00983412	0.239861	0.0153775	0.0168237
13.4661	42.244	0.238064	0.5	0.192653	0.265746		13.4176	42.3981	0.38957	0.5	0.0040865	0.38469
13.4662	42.244	0.521075	0.5	0.113931	0.790138		13.4166	42.3982	0.00566728	0.277701	0.0256112	0.00392096
13.4957	42.2486	0.150852	0.0570652	8.31776e-05	0.0229532		13.4165	42.3982	0.265314	0.256145	0.175374	0.13841
13.4063	42.2347	0.774063	0.23079	0.00253686	0.467954		13.4156	42.3984	0.0517529	0.0534731	0.109923	0.029764
13.4154	42.2362	0.563658	0.5	0.0686569	0.753127		13.4156	42.3983	0.147653	0.229069	0.174741	0.160702
13.4716	42.2449	0.879121	0.5	0.40991	0.865516		13.4138	42.3985	0.170998	0.469758	0.103512	0.149239
13.493	42.2483	0.000252033	0.355752	1.31299e-05	0.029448		13.4139	42.3984	0.472634	0.0494798	0.158673	0.179128
13.4152	42.2362	0.20822	0.149408	0.0633839	0.265746		13.4162	42.398	0.384885	0.285227	0.120909	0.464785
13.4155	42.2362	0.142354	0.353654	0.194514	0.0397374		13.4409	42.3939	0.249295	0.00621633	0.116196	0.286039
13.4168	42.2364	0.338672	0.5	0.00274278	0.309564		13.4184	42.3976	0.00859889	0.116418	0.0027259	0.0177505
13.4716	42.245	0.53266	0.5	0.461098	0.645745		13.417	42.3978	0.885716	0.0506475	0.0145408	0.707382
13.4716	42.245	0.795777	0.5	0.0264883	0.903716		13.4162	42.3979	0.0271375	0.184051	0.039213	0.0230865
13.493	42.2483	0.000114683	0.360228	0.0543617	0.000451331		13.414	42.3983	0.751554	0.5	0.044427	0.968481
13.4151	42.2362	0.230281	0.121419	0.38234	0.24552		13.4094	42.399	0.00629622	0.219654	0.00565394	0.00534173
13.4152	42.2362	0.276353	0.5	0.145755	0.255494		13.441	42.3939	0.243298	0.474601	0.350391	0.179128
13.4143	42.2361	0.938551	0.319169	0.125544	0.734826		13.4409	42.3939	0.451277	0.0345068	0.12465	0.37398
13.4157	42.2363	0.105666	0.236197	0.286782	0.0472684		13.4162	42.3979	0.487457	0.0264918	0.0132852	0.501761
13.4564	42.2427	0.845378	0.5	0.00884593	0.513607		13.4094	42.399	0.0637028	0.5	0.000344527	0.0753896
13.3943	42.233	0.696431	0.178435	0.896334	0.467954		13.4106	42.3986	0.168865	0.001	0.0752194	0.0578773
13.406	42.2348	0.732579	0.035648	0.204868	0.942139		13.416	42.3977	0.339802	0.081599	0.330361	0.251846
13.4143	42.2362	0.86386	0.326272	0.00188695	0.734826		13.4106	42.3986	0.138008	0.0414473	0.0726971	0.0970055
13.4153	42.2363	0.0869145	0.234715	0.975382	0.0659557		13.4159	42.3977	0.105274	0.439593	0.24018	0.0528507
13.4564	42.2427	0.95502	0.5	0.000200328	0.790138		13.4164	42.3976	0.348111	0.19962	0.0048891	0.251846
13.3942	42.233	0.373562	0.350195	0.279179	0.980698		13.4165	42.3975	0.153488	0.5	0.278628	0.185607
13.4016	42.2342	0.483775	0.427179	0.028326	0.175465		13.4165	42.3975	0.265052	0.5	0.54454	0.37398
13.405	42.2347	0.478139	0.5	0.00372273	0.498136		13.4156	42.3976	0.375335	0.5	0.113679	0.353119
13.4151	42.2363	0.727782	0.113314	0.060711	0.663209		13.4114	42.3983	0.839512	0.0374305	0.0104524	0.722127
13.4153	42.2363	0.182398	0.5	0.620468	0.199748		13.4104	42.3984	0.0361243	0.291931	0.000726279	0.0418588
13.4113	42.2358	8.82569e-05	0.5	0.230215	0.000771198		13.4104	42.3983	0.00130116	0.5	0.304954	0.00640294
13.4027	42.2344	0.541286	0.277519	0.232577	0.884583		13.4182	42.397	0.515048	0.0308447	0.0967923	0.260114
13.4123	42.2359	0.000342417	0.5	0.0120384	0.00724201		13.4182	42.397	0.392743	0.292543	0.0139263	0.406667
13.3807	42.231	0.833183	0.281511	0.265183	0.790138		13.4153	42.3974	0.313936	0.313722	0.803121	0.33301
13.4026	42.2345	0.329976	0.5	0.0002625	0.942139		13.4153	42.3974	0.0388861	0.0506624	0.843982	0.032867
13.4123	42.236	0.0521461	0.184651	0.589668	0.115813		13.4148	42.3974	0.900094	0.5	0.00589002	0.722127
13.4144	42.2363	0.780226	0.019638	0.00546076	0.577899		13.4131	42.3977	0.535124	0.3601	0.0509732	0.452804
13.4658	42.2443	0.494039	0.5	0.000401458	0.208365		13.4126	42.3978	0.229567	0.18222	0.00513608	0.143746
13.4963	42.2491	0.576612	0.472047	0.0589527	0.561476		13.4131	42.3976	0.0271718	0.5	0.31233	0.0283093
13.3807	42.2311	0.185266	0.00826178	0.0128196	0.235822		13.4496	42.3917	1.76364e-07	0.351964	0.529088	1.38368e-05
13.4091	42.2355	0.170021	0.33264	0.0276151	0.127457		13.4143	42.3973	2.32702e-06	0.00123971	0.000601856	2.5756e-06
13.4144	42.2363	0.98452	0.359576	0.000790165	0.561476		13.4143	42.3973	1.53459e-06	0.0153357	0.000737419	1.74358e-06
13.4154	42.2365	0.0613881	0.130644	0.00497078	0.183302		13.4143	42.3973	3.74469e-06	0.00111107	0.0164442	1.05441e-05
13.4432	42.2408	0.412976	0.167181	0.22151	0.410743		13.4133	42.3974	0.0169516	0.0118056	0.00914002	0.0121047
13.4649	42.2442	0.199018	0.311217	0.0487625	0.0999338		13.4683	42.3885	0.00135905	0.5	0.0254235	0.00811197
13.4657	42.2443	0.46771	0.5	0.000933529	0.24552		13.4133	42.3973	0.562731	0.21676	0.002419	0.527251
13.4963	42.2491	0.121797	0.0892479	0.000666391	0.0472684		13.4157	42.3969	0.948319	0.126874	0.160629	0.968481
13.4144	42.2364	0.52659	0.5	0.0059685	0.410743		13.3817	42.4024	0.0781512	0.147357	0.240143	0.0970055
13.4154	42.2365	0.529909	0.457133	0.0537259	0.255494		13.4156	42.3969	0.523753	0.30507	0.246881	0.353119
13.4154	42.2365	0.531121	0.138819	0.541241	0.980698		13.4153	42.3969	0.438338	0.029701	0.0356922	0.452804
13.4963	42.2491	0.0817847	0.128196	0.000340763	0.0446347		13.4156	42.3968	0.317976	0.0340021	0.000117826	0.363456
13.3782	42.2308	0.983085	0.00921603	0.015565	0.961407		13.4156	42.3967	0.865361	0.379979	0.0195866	0.968481
13.4108	42.2359	0.772401	0.216446	0.0659403	0.410743		13.414	42.3969	0.387068	0.0554454	0.132254	0.34297
13.4108	42.2359	0.452375	0.0670575	0.0895397	0.133611		13.414	42.3969	0.255606	0.5	0.149873	0.199081
13.4529	42.2424	0.0709197	0.0660264	0.00222918	0.0500316		13.4122	42.3971	0.00190683	0.288185	0.0175355	0.00137163
13.4606	42.2436	0.808643	0.0015877	0.478308	0.276278		13.414	42.3967	0.608383	0.014237	0.313884	0.441001
13.4607	42.2436	0.847045	0.333075	0.155771	0.321225		13.4491	42.391	0.237655	0.5	0.542606	0.185607
13.4954	42.249	0.238621	0.111552	0.274319	0.183302		13.414	42.3967	0.950126	0.214855	0.0441072	0.874416
13.4963	42.2492	0.713097	0.161522	0.0183929	0.467954		13.414	42.3966	0.160314	0.167193	0.0491216	0.199081
13.4108	42.2359	0.514815	0.00961853	0.00236976	0.0559653		13.414	42.3966	0.370741	0.364819	0.708231	0.353119
13.412	42.2361	0.54599	0.0309919	0.47549	0.309564		13.431	42.3937	0.827427	0.5	0.369221	0.38469
13.4121	42.2361	0.0482549	0.5	0.76976	0.0472684		13.4263	42.3941	0.031298	0.5	0.880787	0.029764
13.4523	42.2424	0.458488	0.5	0.200582	0.790138		13.4144	42.396	0.00332614	0.157897	0.0571114	0.00417411
13.4529	42.2425	0.00257604	0.208694	0.275707	0.00212199		13.4108	42.3965	4.9107e-05	0.5	0.00257411	0.000405594
13.4733	42.2456	0.767441	0.00377513	0.59173	0.438813		13.4111	42.3963	0.00117186	0.43341	0.00677584	0.000299834
13.4954	42.2491	0.290963	0.00860201	0.0475185	0.0773718		13.411	42.3963	0.00461367	0.5	0.0389422	0.00119501
13.4039	42.2349	0.556888	0.5	0.794439	0.370697		13.4481	42.3897	0.0520876	0.5	0.567964	0.101049
13.4069	42.2353	0.336803	0.293999	0.133379	0.183302		13.4222	42.3937	0.242169	0.164502	0.139783	0.160702
13.412	42.2361	0.771088	0.169276	0.0539371	0.771568		13.4102	42.3955	4.10671e-06	0.5	0.339484	2.35888e-05
13.4125	42.2362	0.0415265	0.5	0.000486117	0.0229532		13.4101	42.3954	0.000563016	0.116322	0.0628926	0.00078336
13.4125	42.2362	0.997249	0.487282	0.980395	0.790138		13.4101	42.3954	0.000433971	0.422341	0.12564	0.000437012
13.4529	42.2425	0.0332033	0.5	0.67156	0.0591452		13.4302	42.3919	0.451271	0.5	0.562503	0.501761
13.4658	42.2445	0.512992	0.0244703	0.0695729	0.980698		13.4302	42.3919	0.0361313	0.04253	0.591798	0.0187217
13.4954	42.2491	0.471965	0.0168231	0.0493388	0.577899		13.3915	42.3981	0.000737598	0.384729	0.318264	0.00078336
13.412	42.2362	0.548317	0.00990458	0.477304	0.922905		13.3915	42.3981	0.00687472	0.0375498	0.117698	0.00192365
13.4125	42.2362	0.146232	0.020585	0.00208497	0.029448		13.4203	42.3934	0.583026	0.417205	0.0734481	0.678225
13.4148	42.2366	0.726696	0.403107	0.0165033	0.255494		13.4298	42.3914	0.00115632	0.33608	0.162418	0.000323537
13.4153	42.2367	0.227789	0.5	0.789219	0.438813		13.4298	42.3914	0.00226892	0.0145534	0.210101	0.000299834
13.417	42.2369	0.11151	0.0608206	0.0543283	0.217247		13.428	42.3916	0.00291462	0.5	0.0628157	0.00640294
13.4697	42.2451	0.421518	0.5	0.0386584	0.529325		13.4285	42.3914	0.456785	0.284444	0.196678	0.527251
13.4148	42.2366	0.685792	0.14183	2.05755e-05	0.115813		13.4285	42.3914	0.499063	0.5	0.214646	0.452804
13.4153	42.2367	0.196548	0.182573	0.00858293	0.397117		13.4281	42.3914	0.302426	0.5	0.427287	0.37398
13.4071	42.2355	0.122564	0.317415	0.315259	0.0950444		13.4288	42.3913	0.0109117	0.312506	0.0863916	0.0159396
13.4122	42.2363	0.83782	0.0877212	0.787533	0.753127		13.4281	42.3914	0.581695	0.5	0.0540279	0.566686
13.4153	42.2367	0.403381	0.225067	0.00584986	0.645745		13.4281	42.3913	0.972923	0.133979	0.0789421	0.968481
13.417	42.237	0.0620755	0.43376	0.00830964	0.133611		13.4283	42.3913	0.0408667	0.0602321	0.109591	0.0481942
13.4019	42.2347	4.92109e-06	0.5	0.11593	2.84517e-05		13.4403	42.3892	0.131796	0.5	0.44063	0.15489
13.4027	42.2348	0.305824	0.5	0.05424	0.545283		13.4403	42.3891	0.00185129	0.219431	0.0977077	0.0114442
13.4028	42.2348	0.90172	0.5	0.0647776	0.680857		13.4574	42.3862	0.00535014	0.189834	0.278553	0.00472537
13.4128	42.2364	0.894964	0.0153597	0.0459031	0.333169		13.4293	42.3904	0.00046867	0.352472	0.0501688	9.16142e-05
13.4153	42.2368	0.0453716	0.237437	0.341372	0.0950444		13.4623	42.3848	9.9631e-08	0.118233	0.784989	3.43749e-06
13.4634	42.2443	0.503404	0.001	0.0116728	0.345397		13.4621	42.3847	0.00380109	0.359315	0.386752	0.0102185
13.466	42.2447	0.515016	0.0221965	0.250818	0.298186		13.4176	42.3908	0.620243	0.428356	0.838407	0.464785
13.4128	42.2364	0.778841	0.34763	0.0612502	1		13.4176	42.3907	0.516906	0.0760901	0.755855	0.527251
13.4215	42.2378	0.296216	0.300505	0.0728481	0.24552		13.4531	42.3849	0.121452	0.5	0.915577	0.0753896
13.4608	42.2439	0.153713	0.5	0.366265	0.333169		13.4254	42.3885	0.027771	0.223099	0.453745	0.0312825
13.466	42.2447	0.425209	0.19279	0.74203	0.265746		13.4327	42.3873	0.619121	0.208947	0.126612	0.635388
13.4722	42.2457	0.944853	0.445682	0.0660809	0.980698		13.4254	42.3885	0.0289264	0.305476	0.349932	0.0219197
13.4909	42.2486	0.60765	0.5	0.0124842	0.808829		13.4416	42.3855	0.0662252	0.5	0.503668	0.105225
13.4012	42.2347	0.412146	0.435603	0.155439	0.153456		13.4416	42.3855	0.321075	0.1057	0.305886	0.649541
13.4025	42.2349	0.00905051	0.263753	0.0962086	0.00836137		13.4529	42.3825	0.288232	0.5	0.0262272	0.476939
13.4608	42.2439	0.964404	0.0604424	0.000591094	0.645745		13.4469	42.3815	0.0411719	0.424904	0.603987	0.0208045
13.4722	42.2457	0.984733	0.0610632	0.00393001	0.884583		13.4469	42.3814	0.0685793	0.348008	0.30491	0.0893078
13.4909	42.2486	0.45734	0.342355	3.03421e-05	0.942139		13.4408	42.3823	0.176733	0.454354	0.196039	0.243762
13.4012	42.2347	0.807572	0.47744	0.216027	0.345397		13.4539	42.3796	0.0744394	0.132086	0.378176	0.0114442
13.4025	42.2349	0.0221355	0.5	0.0905788	0.0110744		13.4157	42.3854	0.830217	0.0447473	0.934384	0.678225
13.4619	42.2441	0.160416	0.5	0.0753058	0.105022		13.4157	42.3854	0.0272421	0.320259	0.537311	0.0150967
13.4909	42.2487	0.550658	0.0890728	2.98106e-07	0.561476		13.4568	42.3778	2.451e-06	0.118674	0.739267	1.9233e-06
13.4025	42.2349	0.374279	0.5	0.00592303	0.611405		13.4568	42.3778	7.09384e-07	0.207972	0.43015	1.29612e-06
13.403	42.235	0.0577224	0.5	0.0162131	0.0312996		13.4568	42.3778	2.63164e-06	0.5	0.50071	5.51968e-06
13.409	42.236	0.0723624	0.5	0.440939	0.110313		13.4514	42.3784	0.000259636	0.197286	0.034152	4.70448e-05
13.4967	42.2496	0.139512	0.460303	0.0106858	0.0591452		13.4516	42.3782	0.979748	0.353028	0.784216	0.843385
13.4086	42.2359	0.273503	0.5	0.195603	0.309564		13.4594	42.3768	0.798448	0.5	0.0143116	0.812596
13.4089	42.236	0.268438	0.5	0.732339	0.115813		13.4594	42.3767	0.395287	0.5	0.0200613	0.41793
13.409	42.236	0.000725973	0.0975955	0.00935291	6.55272e-05		13.4597	42.3765	0.205878	0.0111592	0.019372	0.0753896
13.4108	42.2363	0.618216	0.5	0.784101	1		13.4597	42.3765	0.00168165	0.296778	0.00417582	0.00219672
13.4145	42.2368	0.596363	0.5	0.355391	0.980698		13.4423	42.3789	0.000354561	0.5	0.811276	0.00111481
13.4176	42.2373	0.910899	0.5	0.0136206	0.922905		13.4478	42.3776	1.72866e-08	0.0663396	0.0687736	4.70637e-07
13.4453	42.2416	0.0267211	0.140531	0.812186	0.0202007		13.4478	42.3775	2.79409e-10	0.199558	0.173509	2.25642e-08
13.4463	42.2418	0.377788	0.5	0.0801305	0.397117		13.4478	42.3775	5.84044e-11	0.5	0.462017	2.14767e-09
13.4733	42.246	0.0955649	0.227476	0.0457642	0.208365		13.4478	42.3775	3.61409e-07	0.5	0.326808	7.84719e-07
13.4967	42.2497	0.217412	0.5	0.898468	0.208365		13.4708	42.3737	0.00019478	0.098509	0.693625	0.000678503
13.3935	42.2336	4.22714e-05	0.166938	0.00465662	5.33703e-05		13.4708	42.3737	1.98987e-05	0.109142	0.996011	0.000323537
13.4086	42.236	0.304448	0.311386	0.884094	0.24552		13.4463	42.3776	1.00061e-08	0.172582	0.156697	1.83103e-07
13.409	42.236	0.425338	0.0721145	0.236679	0.753127		13.4462	42.3775	0.0149424	0.191211	0.493122	0.00304184
13.4092	42.2361	0.397771	0.5	0.598001	0.438813		13.4647	42.3745	0.114165	0.153819	0.95545	0.149239
13.4145	42.2369	0.124926	0.424536	0.566295	0.139993		13.4462	42.3775	0.615617	0.130806	0.331982	0.621368
13.4463	42.2418	0.969635	0.0580734	0.0187151	0.321225		13.4647	42.3745	0.0497458	0.5	0.786582	0.0691253
13.4011	42.2348	0.00966048	0.5	0.157354	0.00778368		13.4463	42.3774	1.04775e-05	0.5	0.373361	5.02465e-06
13.4012	42.2348	0.350952	0.0236809	0.00655846	0.903716		13.4463	42.3774	1.81641e-06	0.5	0.498391	3.43749e-06
13.409	42.2361	0.130995	0.401133	0.136172	0.333169		13.4211	42.3807	0.00348057	0.5	0.455383	0.0219197
13.4092	42.2361	0.647722	0.424268	0.5867	0.410743		13.421	42.3807	0.926325	0.39451	0.168259	0.635388
13.4131	42.2367	0.716435	0.17635	0.189336	0.309564		13.4293	42.3793	0.748842	0.5	0.131132	0.812596
13.4429	42.2413	0.925649	0.028558	0.837874	0.922905		13.4244	42.3801	2.98054e-05	0.445229	0.0853923	0.000220347
13.4602	42.244	0.105184	0.5	0.0197553	0.0999338		13.421	42.3806	0.333925	0.5	0.10074	0.235863
13.4647	42.2447	0.894389	0.0534178	0.000758946	0.370697		13.4702	42.3726	0.758337	0.306132	0.157754	0.782094
13.3773	42.2311	0.000424611	0.5	0.114671	0.000411982		13.4285	42.379	5.87431e-06	0.0448327	0.267274	6.05715e-05
13.3812	42.2318	0.657013	0.324064	0.450622	0.333169		13.4284	42.3789	0.00352505	0.184275	0.141654	0.00250491
13.401	42.2348	0.152718	0.492675	0.0254901	0.105022		13.4284	42.3789	0.748448	0.0374032	0.24876	0.243762
13.4012	42.2349	0.904971	0.26533	0.000238529	0.0999338		13.4284	42.3789	0.00209081	0.211469	0.745656	0.00137163
13.4131	42.2367	0.677709	0.207976	0.772961	0.357906		13.4284	42.3788	0.00168979	0.5	0.661123	0.00219672
13.443	42.2414	0.558472	0.0513572	0.158554	0.498136		13.4283	42.3788	6.77433e-10	0.00286244	0.774269	1.31747e-09
13.4431	42.2414	0.460832	0.297362	0.268266	0.175465		13.4283	42.3788	9.54297e-09	0.0803736	0.328746	2.5279e-08
13.4646	42.2448	0.925283	0.5	0.198413	1		13.4282	42.3788	7.07642e-06	0.195165	0.238802	5.51968e-06
13.4011	42.2349	0.932085	0.267455	0.219157	0.424642		13.4291	42.3783	2.04637e-06	0.267125	0.925733	5.51968e-06
13.4012	42.2349	0.212796	0.402543	0.00821884	0.0135961		13.453	42.3743	2.02925e-07	0.5	0.297027	1.43134e-06
13.4017	42.235	0.287583	0.001	0.000723909	0.105022		13.4587	42.3734	0.321315	0.5	0.975112	0.149239
13.4101	42.2363	0.424488	0.001	0.0336515	0.529325		13.453	42.3743	5.63587e-09	0.136187	0.387675	2.5279e-08
13.4129	42.2367	0.117283	0.5	0.0118214	0.052929		13.4587	42.3733	0.0123398	0.5	0.989568	0.0102185
13.4161	42.2372	0.758208	0.267379	0.33541	0.808829		13.4587	42.3733	0.00286576	0.5	0.721611	0.00392096
13.4431	42.2414	0.60521	0.387796	0.450223	0.370697		13.4166	42.3801	0.000125934	0.15647	0.703314	0.000470691
13.4631	42.2446	0.835933	0.5	8.02758e-06	0.424642		13.4406	42.3762	0.208807	0.498867	0.0292619	0.0187217
13.4645	42.2448	0.753776	0.0117472	0.0260967	1		13.4405	42.3761	2.78354e-11	0.240825	0.739199	2.5279e-08
13.401	42.2349	0.739328	0.5	0.127306	0.980698		13.3914	42.3841	0.00191726	0.0671703	0.395805	0.00128051
13.4011	42.2349	0.830108	0.0544668	0.00339112	0.333169		13.4405	42.3761	0.282687	0.254008	0.910187	0.251846
13.4012	42.2349	0.474004	0.00737878	0.0702041	0.0815173		13.42	42.3794	2.91323e-08	0.5	0.224536	3.10535e-07
13.4061	42.2357	0.537379	0.0598321	0.545496	0.24552		13.4403	42.3761	8.41372e-05	0.470348	0.00394014	0.000506779
13.4101	42.2363	0.913234	0.0436286	0.294464	0.980698		13.42	42.3794	9.12866e-10	0.449355	0.479935	3.16915e-08
13.4129	42.2368	0.171033	0.118722	0.303603	0.0421259		13.4403	42.3761	0.000122584	0.241197	0.0163617	0.000160976
13.416	42.2373	0.783746	0.5	0.350277	0.345397		13.3419	42.3917	0.10596	0.259831	0.888054	0.199081
13.4657	42.245	0.443747	0.5	0.00417561	0.370697		13.3419	42.3917	0.020074	0.395254	0.264986	0.00911101
13.4732	42.2462	0.219429	0.001	0.000737041	0.0446347		13.4249	42.3782	1.31186e-06	0.428344	0.318576	4.70637e-07
13.3769	42.2312	0.316277	0.46838	0.872296	0.133611		13.4249	42.3782	3.71574e-06	0.117669	0.217741	1.9233e-06
13.3815	42.2319	0.707955	0.0614649	0.564026	0.790138		13.3417	42.3916	0.352247	0.5	0.0930093	0.937012
13.4062	42.2358	0.0967075	0.0723119	0.0211848	0.0353039		13.3417	42.3916	0.171223	0.191902	0.90272	0.179128
13.4623	42.2445	0.521289	0.221017	0.0119734	0.453251		13.4563	42.3729	0.000136813	0.5	0.0252785	0.000903096
13.4657	42.245	0.834406	0.238536	0.029564	0.645745		13.4563	42.3729	4.7279e-05	0.0607746	0.00592482	0.000631114
13.4732	42.2462	0.964364	0.001	0.498846	0.287091		13.425	42.3779	0.000673656	0.331058	0.85499	0.000116908
13.377	42.2312	0.152406	0.114865	0.685067	0.208365		13.425	42.3779	0.000909763	0.5	0.199213	0.000470691
13.4132	42.2369	0.198871	0.214039	0.219994	0.199748		13.4243	42.378	0.000970049	0.435477	0.375646	0.000586819
13.4133	42.2369	0.0162914	0.22384	0.00715201	0.00316094		13.4244	42.3778	2.66585e-06	0.017406	0.697221	3.43749e-06
13.4732	42.2463	0.837	0.5	0.863356	0.922905		13.4244	42.3778	7.10219e-06	0.140755	0.156923	1.43134e-06
13.4038	42.2355	0.258553	0.5	0.447024	0.467954		13.4419	42.3749	0.0296732	0.296461	0.0103523	0.060536
13.4133	42.237	0.0886427	0.346671	0.218276	0.0189358		13.4568	42.3725	0.0608641	0.5	0.625175	0.128197
13.4133	42.237	0.527436	0.26593	0.00174249	0.175465		13.4557	42.3727	0.000140494	0.139374	0.198559	0.000174216
13.3924	42.2337	0.491778	0.5	0.122802	0.865516		13.4419	42.3749	6.65677e-05	0.365829	0.720431	6.58461e-05
13.4018	42.2352	0.134681	0.226791	0.0472874	0.0472684		13.4557	42.3726	0.000153496	0.127316	0.0255275	4.32119e-05
13.4043	42.2356	0.691174	0.260579	0.00387542	0.865516		13.4419	42.3749	4.28817e-07	0.165437	0.430049	2.12074e-06
13.4168	42.2375	0.833358	0.00405028	0.150899	0.790138		13.441	42.375	0.147976	0.257229	0.209868	0.101049
13.377	42.2314	0.746955	0.21724	0.192904	0.790138		13.4244	42.3777	0.00101537	0.5	0.127931	0.000257226
13.4018	42.2352	0.195423	0.001	0.879803	0.0166122		13.3384	42.3915	0.241325	0.0193339	0.236502	0.133227
13.4043	42.2356	0.0177168	0.5	0.000334941	0.0858411		13.3384	42.3914	0.106335	0.5	0.125451	0.199081
13.4111	42.2367	0.148923	0.0583128	0.147357	0.321225		13.4382	42.3753	1.45319e-07	0.5	0.630497	1.43134e-06
13.4005	42.2351	0.16275	0.213697	0.180648	0.110313		13.3416	42.3907	0.000393828	0.5	0.718159	0.00285219
13.4018	42.2353	0.789689	0.0359764	0.272048	0.790138		13.3391	42.3911	0.00211891	0.5	0.0203486	0.00285219
13.4112	42.2367	0.00498793	0.208178	0.00303514	0.00581407		13.4541	42.3723	0.424692	0.5	0.0887525	0.476939
13.4602	42.2444	0.994424	0.142231	0.0997987	0.980698		13.4639	42.3707	0.691274	0.5	0.901794	0.707382
13.4005	42.2351	0.0461919	0.404842	0.568723	0.0353039		13.3409	42.3906	0.0263493	0.301487	0.753615	0.101049
13.4113	42.2368	0.355712	0.222245	0.421124	0.577899		13.4639	42.3707	0.379204	0.5	0.781637	0.363456
13.4115	42.2368	0.248454	0.446078	0.00102534	0.287091		13.3411	42.3902	0.192818	0.0924345	0.000656951	0.313655
13.4134	42.2371	0.454719	0.5	0.000487214	0.734826		13.3411	42.3902	0.576153	0.5	0.000201023	0.501761
13.4162	42.2376	0.0862918	0.5	0.62997	0.110313		13.4636	42.3703	0.841287	0.0145926	0.561686	0.678225
13.4602	42.2444	0.897115	0.389427	0.44299	1		13.3413	42.39	0.532767	0.499025	0.876126	0.514424
13.4004	42.2351	0.304226	0.285572	0.191931	0.790138		13.4636	42.3703	0.0036434	0.139671	0.0618717	0.032867
13.404	42.2357	0.446962	0.0173056	0.611431	0.846528		13.4252	42.3764	3.20486e-05	0.5	0.0740523	7.15534e-05
13.4119	42.2369	0.316562	0.328677	0.012529	0.611405		13.4252	42.3764	2.7586e-09	0.151401	0.64003	3.96705e-08
13.413	42.2371	0.138715	0.0938252	0.0109165	0.0260259		13.4595	42.3708	2.22751e-05	0.277961	0.35911	6.58461e-05
13.4134	42.2372	0.468627	0.5	0.37831	0.611405		13.4595	42.3708	2.5273e-07	0.270377	0.286118	3.43749e-06
13.4161	42.2376	0.0784452	0.5	0.658379	0.235822		13.4594	42.3708	1.67396e-06	0.5	0.831806	1.38368e-05
13.4162	42.2376	0.0162248	0.5	0.636031	0.0177407		13.4734	42.3685	0.00869629	0.5	0.00177518	0.00534173
13.4604	42.2445	0.948265	0.385018	0.00687298	0.846528		13.4734	42.3684	5.17065e-05	0.5	0.000107254	3.96764e-05
13.3792	42.2318	0.0596484	0.0377441	0.508788	0.0559653		13.4711	42.3688	0.479899	0.5	0.173752	0.843385
13.3793	42.2319	0.137864	0.252033	0.219997	0.153456		13.4712	42.3688	0.451869	0.242862	0.179168	0.937012
13.3976	42.2347	0.0120685	0.5	0.00780736	0.0202007		13.354	42.3875	0.265981	0.5	0.1508	0.295056
13.4133	42.2372	0.955715	0.0834617	0.0656604	0.790138		13.4251	42.3759	3.64149e-07	0.0483396	0.0356471	2.51674e-07
13.4134	42.2372	0.706236	0.5	0.159397	0.903716		13.4274	42.3755	8.98474e-06	0.293474	0.230692	6.05715e-05
13.4033	42.2356	0.504268	0.447954	0.415979	0.513607		13.4251	42.3759	9.03882e-05	0.5	0.00688463	3.96764e-05
13.4039	42.2357	0.830664	0.0485673	0.188283	0.753127		13.4274	42.3755	0.15125	0.00783413	0.831033	0.13841
13.4134	42.2372	0.493322	0.00430605	0.108457	0.942139		13.3398	42.3896	0.448205	0.5	0.367471	0.41793
13.4165	42.2377	0.467601	0.120959	0.269244	0.287091		13.4282	42.3753	1.4906e-12	0.0540941	0.793552	3.47973e-09
13.4166	42.2377	0.702865	0.0165902	0.385107	0.645745		13.4274	42.3755	0.000106908	0.120648	0.826339	0.000137286
13.4209	42.2384	0.061507	0.360691	0.416478	0.0155472		13.4282	42.3753	4.96037e-11	0.5	0.0366845	7.71058e-08
13.4651	42.2453	0.886535	0.5	0.190624	1		13.4277	42.3754	9.36228e-06	0.173046	0.0167005	5.21698e-07
13.4655	42.2454	0.335581	0.209978	0.067114	0.467954		13.4282	42.3753	0.00112571	0.0401915	0.359997	0.000470691
13.4659	42.2454	0.0615993	0.062423	0.320584	0.0659557		13.4277	42.3753	3.37948e-08	0.362045	0.300215	2.26441e-07
13.3894	42.2335	0.302319	0.0352668	0.967331	0.0229532		13.4282	42.3752	0.0536311	0.182746	0.0598993	0.0177505
13.3896	42.2335	0.772128	0.5	0.707369	0.453251		13.4276	42.3753	3.29428e-08	0.413562	0.353515	1.43134e-06
13.4034	42.2357	0.470598	0.08267	0.195237	0.383768		13.4746	42.3676	0.00139813	0.153903	0.403578	0.00417411
13.4039	42.2358	0.264628	0.221174	0.710794	0.226399		13.4804	42.3665	0.795658	0.001	0.619155	0.593739
13.4162	42.2377	0.759514	0.381064	0.172957	1		13.4803	42.3665	0.016493	0.118075	0.151048	0.029764
13.4164	42.2377	0.640098	0.0523752	0.387627	0.628475		13.4805	42.3664	0.140256	0.292167	0.0715659	0.0893078
13.4166	42.2378	0.315217	0.5	0.0738733	0.467954		13.4803	42.3665	0.0129827	0.309813	0.107574	0.0187217
13.4209	42.2384	0.176309	0.188891	0.563355	0.069596		13.4565	42.3703	0.0741541	0.10714	0.132236	0.0255828
13.4574	42.2441	0.0148858	0.0295274	0.529529	0.00500869		13.4564	42.3703	0.00126156	0.150146	0.107896	0.000545433
13.4574	42.2441	0.0219583	0.0557806	0.12121	0.00539783		13.4546	42.3706	0.00378971	0.5	0.312408	0.00179914
13.465	42.2453	0.598161	0.5	0.076068	0.498136		13.4544	42.3706	0.00266303	0.5	0.816545	0.00417411
13.4963	42.2502	0.0802428	0.5	0.0029118	0.153456		13.426	42.3752	0.000382029	0.189922	0.567508	0.000323537
13.3894	42.2336	0.635326	0.218749	0.791368	0.453251		13.3627	42.3854	0.00706308	0.5	0.212909	0.00472537
13.3895	42.2336	0.208789	0.135451	0.000272134	0.0773718		13.4545	42.3706	0.00979512	0.0519079	0.00709385	0.000678503
13.4034	42.2357	0.683735	0.5	0.359545	0.628475		13.4544	42.3706	0.0118638	0.5	0.555854	0.0102185
13.4038	42.2358	0.879412	0.273654	0.333661	0.903716		13.4259	42.3752	0.00485422	0.5	0.727228	0.00179914
13.4166	42.2378	0.640178	0.405543	0.49452	0.663209		13.3627	42.3854	0.000501671	0.5	0.9156	0.00192365
13.4177	42.238	0.709148	0.15208	0.00137767	0.698682		13.4566	42.3702	0.000628766	0.368925	0.664822	0.000405594
13.4574	42.2442	0.0484264	0.5	0.288944	0.0374648		13.456	42.3703	0.0999526	0.5	0.822922	0.128197
13.4657	42.2455	0.0458398	0.342209	0.179151	0.0397374		13.4567	42.3701	0.00010477	0.389616	0.646734	1.26432e-05
13.4962	42.2502	0.113817	0.5	3.71953e-06	0.127457		13.4562	42.3702	0.000218259	0.5	0.0984436	0.000323537
13.3773	42.2317	0.00331858	0.5	0.792653	0.00316094		13.4357	42.3735	1.13218e-05	0.341877	0.51273	6.40317e-07
13.4038	42.2358	0.579294	0.5	0.280929	0.922905		13.4279	42.3748	6.19872e-07	0.5	0.0192244	8.78032e-06
13.4601	42.2446	0.690032	0.421113	0.375483	0.771568		13.4566	42.3701	0.000380528	0.0853094	0.990047	6.05715e-05
13.4663	42.2456	0.497647	0.13022	0.121791	0.226399		13.4562	42.3702	0.158814	0.156458	0.125806	0.0632951
13.4664	42.2456	0.905436	0.5	0.84377	0.529325		13.4534	42.3706	0.033383	0.5	0.0015015	0.0399101
13.496	42.2502	0.000177809	0.5	3.06987e-06	0.000706294		13.4357	42.3735	7.21279e-06	0.5	0.169334	2.33757e-06
13.3787	42.232	0.595344	0.149943	0.137092	0.357906		13.4279	42.3747	2.06124e-08	0.5	0.0422287	2.03661e-07
13.4038	42.2359	0.43959	0.285482	0.876887	0.321225		13.3634	42.3851	0.548387	0.5	0.844217	0.751923
13.4663	42.2456	0.921318	0.5	0.622797	0.628475		13.4569	42.37	0.00750481	0.0564361	0.625419	0.00285219
13.496	42.2503	0.0340113	0.5	1.69592e-06	0.00625903		13.3634	42.3851	0.289538	0.317484	0.35729	0.268569
13.496	42.2503	0.34092	0.00198588	0.00782375	0.345397		13.4568	42.37	0.000341655	0.281525	0.905025	0.000160976
13.3862	42.2332	0.155014	0.5	0.00437991	0.191395		13.4611	42.3692	8.98138e-05	0.271664	0.0170343	4.32119e-05
13.4177	42.2381	0.847927	0.5	0.00780348	0.529325		13.4568	42.3699	9.27314e-05	0.0172355	0.0773359	0.000257226
13.496	42.2503	0.198894	0.5	0.00978012	0.199748		13.4553	42.3702	8.43723e-07	0.391919	5.32433e-05	1.15482e-05
13.417	42.238	0.0241196	0.314997	0.117391	0.0189358		13.3635	42.385	0.424103	0.5	0.911024	0.607483
13.3859	42.2332	0.907203	0.5	0.236894	0.884583		13.4611	42.3692	3.47663e-05	0.414921	0.0298081	3.06442e-05
13.3934	42.2344	0.00019291	0.0886389	0.126768	0.000312312		13.4553	42.3701	1.22143e-08	0.283175	3.09395e-05	4.24412e-07
13.417	42.2381	0.0523812	0.299407	0.148974	0.0472684		13.4257	42.3749	7.0857e-06	0.0194283	0.954533	1.29612e-06
13.4174	42.2381	0.203848	0.0228407	0.00467243	0.0858411		13.3635	42.3849	0.469202	0.5	0.750409	0.527251
13.444	42.2423	0.504681	0.286594	0.394416	0.276278		13.4553	42.3701	2.42508e-09	0.0453081	0.031982	6.90869e-08
13.4623	42.2452	0.727088	0.5	0.0613866	0.846528		13.4622	42.3689	0.00609953	0.5	0.604262	0.00179914
13.3856	42.2332	0.00996035	0.0235755	5.31221e-05	0.00341762		13.427	42.3746	1.76326e-07	0.102928	0.455258	9.59348e-08
13.4134	42.2376	0.162421	0.5	0.0636264	0.133611		13.3333	42.3897	0.258579	0.287246	0.258425	0.38469
13.4135	42.2376	0.901095	0.415421	0.899272	0.980698		13.4622	42.3689	0.000280055	0.100026	0.564403	7.77265e-05
13.4152	42.2379	0.269047	0.5	0.685088	0.529325		13.4543	42.3702	0.469792	0.5	0.0999277	0.489265
13.4174	42.2382	0.859416	0.5	0.5347	0.980698		13.427	42.3746	8.38951e-07	0.327533	0.590106	1.17324e-06
13.444	42.2423	0.244309	0.0458198	0.860633	0.663209		13.3631	42.3849	0.076567	0.5	0.756173	0.0786913
13.4619	42.2451	0.836081	0.5	0.0394294	0.808829		13.457	42.3697	6.89256e-06	0.368112	0.551567	3.06442e-05
13.4624	42.2452	0.676885	0.5	0.774274	0.771568		13.4543	42.3701	0.356045	0.5	0.00706373	0.313655
13.4649	42.2456	0.0318434	0.167205	0.118949	0.0374648		13.341	42.3884	0.74785	0.5	0.00614349	0.34297
13.5009	42.2512	0.103046	0.5	0.00227727	0.217247		13.4571	42.3697	0.00176667	0.5	0.99343	0.004442
13.3809	42.2325	0.899379	0.5	0.183588	0.545283		13.4571	42.3697	2.04473e-06	0.5	0.65347	1.15482e-05
13.3987	42.2353	0.683592	0.086329	0.785569	0.827629		13.341	42.3884	0.421733	0.5	0.00393981	0.220611
13.3989	42.2353	0.644179	0.00585675	0.091461	0.545283		13.4571	42.3696	2.13092e-05	0.5	0.564632	5.11987e-05
13.4022	42.2358	0.234823	0.5	0.217934	0.698682		13.341	42.3883	0.312308	0.5	0.00399031	0.101049
13.4135	42.2376	0.903962	0.0535204	0.852991	0.827629		13.4569	42.3696	5.21352e-08	0.361189	0.272523	9.60237e-07
13.4174	42.2382	0.941805	0.5	0.529296	0.827629		13.4569	42.3696	0.00392885	0.5	0.624572	0.00721214
13.4589	42.2447	0.107129	0.5	0.0549575	0.110313		13.4272	42.3744	1.29378e-08	0.5	0.450199	1.64559e-07
13.4619	42.2452	0.698701	0.5	0.0216925	0.753127		13.4272	42.3743	4.27003e-09	0.146661	0.241004	5.54011e-08
13.4624	42.2452	0.949414	0.100858	0.0256336	0.645745		13.3644	42.3844	0.924119	0.0709647	0.328909	0.937012
13.4646	42.2456	0.630466	0.5	0.0385898	0.771568		13.4797	42.3658	0.0806687	0.211679	0.327422	0.101049
13.3779	42.2321	0.638354	0.5	0.867367	0.467954		13.416	42.3761	7.48876e-07	0.087217	0.597579	2.79612e-07
13.378	42.2321	0.652708	0.205406	0.955867	0.771568		13.3632	42.3846	0.973163	0.5	0.786478	0.858873
13.3852	42.2332	0.826089	0.242023	0.837277	0.903716		13.3439	42.3877	0.985055	0.5	0.785919	0.766964
13.3987	42.2353	0.665424	0.0953955	0.779101	1		13.4796	42.3657	0.642412	0.5	0.207697	0.38469
13.3988	42.2354	0.489962	0.300844	0.661017	0.276278		13.4609	42.3688	0.00750209	0.13719	0.386191	0.00472537
13.4021	42.2359	0.304037	0.5	0.699691	0.345397		13.4608	42.3688	6.55636e-06	0.41719	0.839505	2.57483e-05
13.4136	42.2377	0.855143	0.00661983	0.0368835	0.865516		13.4569	42.3694	0.000929832	0.5	0.713487	0.00128051
13.4589	42.2447	0.127036	0.5	0.194245	0.146606		13.4272	42.3742	1.79927e-10	0.238378	0.0740032	1.60108e-08
13.4653	42.2457	0.546248	0.12485	0.071238	0.438813		13.3439	42.3877	0.519004	0.270022	0.488614	0.553385
13.4654	42.2457	0.798747	0.001	0.689105	0.191395		13.4795	42.3657	0.900718	0.00612955	0.0549711	0.593739
13.4957	42.2505	0.944198	0.356541	0.0149163	0.980698		13.4677	42.3676	0.0521952	0.146207	0.810452	0.160702
13.378	42.2321	0.963948	0.5	0.911374	0.827629		13.4608	42.3688	1.5013e-08	0.5	0.458655	8.60229e-08
13.385	42.2332	0.187431	0.392805	0.422053	0.287091		13.4578	42.3692	0.00051986	0.5	0.986782	0.000376296
13.4035	42.2361	0.658524	0.21364	0.471331	0.438813		13.4579	42.3692	0.0150968	0.0886813	0.526643	0.0127987
13.4038	42.2362	0.262173	0.0135313	0.602243	0.255494		13.4568	42.3694	0.00109742	0.0702265	0.03682	0.00234619
13.4132	42.2376	0.211395	0.001	0.325867	0.175465		13.4272	42.3742	2.96511e-11	0.0378046	0.72706	3.08602e-09
13.4152	42.238	0.498463	0.5	0.00906348	0.453251		13.4677	42.3676	6.82417e-05	0.29076	0.420928	0.000203827
13.4404	42.2419	0.34157	0.385942	0.353538	0.482917		13.4578	42.3692	1.53755e-10	0.0650576	0.768634	1.79575e-08
13.4653	42.2458	0.975957	0.458385	0.0342882	0.628475		13.4579	42.3692	0.00655063	0.207549	0.58348	0.0076502
13.4654	42.2458	0.795531	0.158841	0.790116	0.884583		13.4355	42.3728	0.00287539	0.183098	0.559863	0.000841254
13.472	42.2468	0.000701805	0.0240307	0.0208289	9.81206e-05		13.4272	42.3742	3.60072e-09	0.371293	0.471393	8.60229e-08
13.4956	42.2505	0.189372	0.5	0.0638221	0.110313		13.458	42.3691	2.83727e-05	0.321406	0.820677	3.64166e-05
13.4956	42.2505	0.314853	0.0288914	0.0175389	0.0903485		13.4572	42.3693	2.10147e-06	0.327909	0.504158	1.15482e-05
13.385	42.2333	0.10382	0.290281	0.795411	0.139993		13.4355	42.3728	2.24127e-06	0.0893693	0.279639	5.51968e-06
13.4403	42.2419	0.314082	0.5	0.175128	0.545283		13.3439	42.3875	0.264004	0.5	0.00861588	0.323238
13.459	42.2448	0.596452	0.217983	0.119387	0.790138		13.3421	42.3878	0.291099	0.109125	0.0175351	0.452804
13.4603	42.245	0.0475563	0.5	0.00716526	0.217247		13.4572	42.3692	1.39108e-07	0.5	0.353727	1.9233e-06
13.4647	42.2457	0.74026	0.0990318	0.343013	0.498136		13.4359	42.3727	0.000190358	0.0756877	0.743862	1.38368e-05
13.4654	42.2458	0.0827931	0.5	0.976099	0.139993		13.4355	42.3727	1.13934e-06	0.0970255	0.0924427	2.5756e-06
13.4721	42.2469	0.03527	0.0159924	3.48863e-05	0.00778368		13.4274	42.3741	3.48861e-08	0.245413	0.853972	3.5464e-08
13.4954	42.2505	0.542958	0.041842	0.174078	0.235822		13.3439	42.3875	0.319659	0.5	0.0579826	0.38469
13.4956	42.2505	0.192089	0.292725	0.00847441	0.146606		13.3421	42.3878	0.818568	0.19751	0.0469909	0.607483
13.4968	42.2507	0.949797	0.0312368	0.0988234	0.961407		13.4678	42.3675	0.00278343	0.392399	0.673445	0.00502502
13.4969	42.2507	0.836258	0.477088	0.00310823	0.482917		13.4573	42.3692	1.11595e-06	0.5	0.660985	3.06442e-05
13.4142	42.2379	0.579021	0.108542	0.0899992	0.255494		13.4359	42.3726	8.08362e-06	0.5	0.0511421	1.65543e-05
13.459	42.2449	0.173472	0.5	0.0316336	0.199748		13.3439	42.3875	0.461921	0.446997	0.196726	0.243762
13.4603	42.2451	0.37405	0.144753	0.00594455	0.680857		13.3421	42.3878	0.284081	0.134133	0.0169881	0.160702
13.4721	42.2469	0.0236666	0.0338016	0.40063	0.00180242		13.4678	42.3674	0.00244929	0.287162	0.153607	0.0076502
13.4954	42.2505	0.17987	0.00888954	0.0197197	0.0773718		13.4572	42.3692	2.36849e-05	0.117901	0.21985	0.000107823
13.4955	42.2505	0.785095	0.0060266	0.0211769	0.333169		13.3445	42.3873	0.00320368	0.306127	0.245134	0.00192365
13.4956	42.2506	0.152626	0.00230426	0.178232	0.0244478		13.3434	42.3875	0.66692	0.00186594	0.366264	0.441001
13.4957	42.2506	0.489978	0.140872	0.0804046	0.287091		13.4678	42.3674	0.0143738	0.296921	0.00292222	0.0438874
13.4968	42.2508	0.75942	0.5	0.0255084	0.846528		13.3444	42.3873	0.893267	0.134001	0.557882	0.874416
13.4142	42.2379	0.901049	0.0520043	0.992684	0.808829		13.3434	42.3875	0.346654	0.0497122	0.0262169	0.38469
13.417	42.2383	0.726113	0.00396676	0.104881	0.903716		13.3443	42.3873	0.059894	0.358941	0.780691	0.060536
13.4171	42.2384	0.63557	0.175787	0.0127576	0.255494		13.3434	42.3874	0.00720475	0.0937318	0.301477	0.0150967
13.4603	42.2451	0.945335	0.5	0.166115	0.734826		13.3415	42.3877	0.129954	0.0335693	0.000195514	0.260114
13.4955	42.2506	0.169617	0.0176708	0.028203	0.0353039		13.4604	42.3685	0.874064	0.411901	0.363559	0.782094
13.4956	42.2506	0.479114	0.00972521	0.0237355	0.0624738		13.3443	42.3873	0.000160821	0.175676	0.167351	7.77265e-05
13.4969	42.2508	0.0983373	0.276971	0.00117743	0.0559653		13.3434	42.3874	0.0292286	0.160334	0.484595	0.0108159
13.4969	42.2508	0.203887	0.00954055	0.00549635	0.0374648		13.3417	42.3877	0.340296	0.0360938	0.158295	0.406667
13.4006	42.2358	0.0702297	0.401058	0.284452	0.105022		13.3415	42.3877	0.23819	0.5	5.72471e-05	0.185607
13.4007	42.2358	0.117211	0.257786	0.0113667	0.110313		13.4572	42.369	2.38057e-06	0.282552	0.334752	6.65336e-06
13.4645	42.2458	0.899094	0.163619	0.393774	0.942139		13.4277	42.3738	2.67698e-07	0.0820246	0.823227	1.19181e-07
13.4698	42.2466	0.618384	0.0250703	0.0139999	0.287091		13.3444	42.3872	0.433667	0.5	0.00902929	0.260114
13.4698	42.2466	0.637902	0.5	0.283425	0.922905		13.3443	42.3872	0.000100878	0.13425	0.0223123	0.000277766
13.4954	42.2506	0.44023	0.00159098	0.020351	0.265746		13.3436	42.3873	0.0787893	0.332914	0.0831072	0.0345197
13.3768	42.2321	0.0983562	0.5	0.0801584	0.139993		13.3434	42.3874	0.0875761	0.242967	0.41165	0.0722018
13.3768	42.2321	0.395907	0.5	0.0117553	0.105022		13.3433	42.3874	0.951323	0.5	0.0822908	0.984238
13.3986	42.2356	0.421516	0.484374	0.916837	0.716675		13.3417	42.3876	0.248733	0.434803	0.532103	0.268569
13.4645	42.2458	0.743073	0.5	0.100515	0.980698		13.3414	42.3877	0.0143554	0.5	0.000728896	0.0187217
13.4646	42.2458	0.679673	0.0793386	0.258356	0.827629		13.3409	42.3878	0.0126469	0.498843	0.235776	0.0135277
13.4698	42.2467	0.449713	0.112451	0.312066	0.628475		13.4572	42.369	2.48262e-07	0.256858	0.199621	8.68217e-07
13.3768	42.2322	0.0595296	0.5	0.00365873	0.0999338		13.4277	42.3737	1.05855e-07	0.5	0.11668	1.17324e-06
13.3986	42.2356	0.794668	0.101644	0.885223	0.884583		13.4176	42.3754	3.85244e-07	0.0393316	0.969474	9.60237e-07
13.4969	42.2509	0.626092	0.00706642	0.0320928	0.467954		13.3444	42.3872	0.112851	0.0772821	0.102595	0.0553164
13.3842	42.2334	0.376488	0.0118927	0.00320088	0.453251		13.3443	42.3872	0.00365739	0.5	0.0142077	0.0255828
13.4022	42.2362	0.661725	0.129619	0.724618	0.298186		13.3436	42.3873	0.0206245	0.5	0.0831429	0.036243
13.4702	42.2468	0.359541	0.0894226	0.0270878	0.333169		13.3418	42.3876	0.959542	0.00833294	0.0303901	0.921311
13.4969	42.251	0.786523	0.105991	0.0822427	0.513607		13.4575	42.3689	3.78741e-08	0.0634899	0.131881	2.51674e-07
13.4024	42.2363	0.0217912	0.273239	0.00648535	0.00464509		13.4276	42.3737	2.63905e-07	0.246091	0.137812	4.1591e-06
13.4149	42.2382	0.878536	0.00877479	0.746148	0.884583		13.3443	42.3871	0.0147692	0.410251	0.00701834	0.0481942
13.4644	42.2459	0.829973	0.00112529	0.704746	0.410743		13.3436	42.3873	0.00125789	0.5	0.0415914	0.00368183
13.4644	42.2459	0.256364	0.5	0.42476	0.345397		13.3418	42.3875	0.959436	0.116255	0.00282544	0.782094
13.3988	42.2357	0.00539984	0.38271	0.763305	0.00249277		13.4575	42.3688	8.5684e-06	0.411639	0.184459	4.1591e-06
13.4011	42.2361	0.167459	0.226806	0.331882	0.153456		13.3443	42.3871	0.00221983	0.00265051	0.0240094	0.00285219
13.4019	42.2362	0.73294	0.0156323	0.566975	0.698682		13.3436	42.3872	0.106546	0.096663	0.028013	0.101049
13.4024	42.2363	0.143441	0.100855	0.00262148	0.0858411		13.3431	42.3873	0.00739759	0.358773	0.0143489	0.0243069
13.4025	42.2363	0.0598046	0.5	0.123891	0.0276914		13.3418	42.3875	0.364979	0.0347871	0.128761	0.33301
13.415	42.2383	0.512539	0.194785	0.400368	0.345397		13.4713	42.3666	6.47359e-07	0.5	0.0139007	0.000220347
13.4585	42.245	0.51369	0.5	0.00135435	0.663209		13.4575	42.3688	1.12699e-09	0.5	0.464687	2.83096e-08
13.4644	42.246	0.680062	0.128288	0.271008	0.884583		13.3431	42.3873	0.839994	0.0584581	0.00649998	0.843385
13.4645	42.246	0.589262	0.106864	0.263664	0.698682		13.3419	42.3875	0.109725	0.109088	0.045217	0.149239
13.465	42.2461	0.585424	0.0551517	0.560386	0.942139		13.4575	42.3688	4.62216e-10	0.387508	0.368763	6.90869e-08
13.4961	42.2509	0.103121	0.448532	0.00811547	0.0500316		13.3419	42.3874	0.889121	0.366022	0.0577285	0.797306
13.4011	42.2361	0.0125029	0.5	0.753128	0.0166122		13.3428	42.3872	0.212249	0.5	0.0177959	0.268569
13.4019	42.2363	0.537269	0.00117354	0.470576	0.0500316		13.3424	42.3873	0.0741629	0.0898884	0.00569371	0.33301
13.4024	42.2363	0.492452	0.0159865	0.000372108	0.922905		13.3418	42.3874	0.123827	0.172801	0.288479	0.251846
13.4025	42.2363	0.00168986	0.440491	0.292038	0.000312312		13.4578	42.3686	4.22467e-08	0.5	0.205846	2.33757e-06
13.4645	42.246	0.674595	0.432678	0.163891	0.846528		13.3424	42.3872	0.295037	0.0758068	0.00708631	0.166678
13.4651	42.2461	0.642748	0.393628	0.159491	0.498136		13.3425	42.3872	0.395204	0.202663	0.177384	0.890007
13.4961	42.2509	0.214277	0.16664	0.0331798	0.0903485		13.3418	42.3873	0.533782	0.5	0.0312929	0.514424
13.4119	42.2379	0.07407	0.162544	0.610246	0.110313		13.4578	42.3686	5.48489e-05	0.259481	0.699777	8.44009e-05
13.4466	42.2433	0.508374	0.315713	0.143142	0.410743		13.3424	42.3872	0.221618	0.00827602	0.0435839	0.228146
13.3837	42.2335	0.597104	0.5	0.410734	0.438813		13.3427	42.3871	1.37575e-05	0.162258	0.0213586	5.56986e-05
13.3837	42.2335	0.372424	0.5	0.469371	0.663209		13.3448	42.3868	0.940778	0.5	0.151459	0.34297
13.4119	42.2379	0.0221203	0.163335	0.170576	0.00195622		13.3429	42.3871	0.621647	0.5	0.103782	0.395586
13.4138	42.2382	0.339905	0.5	0.337006	0.698682		13.3424	42.3872	0.262482	0.5	0.231073	0.395586
13.4653	42.2462	0.148156	0.001	0.00217431	0.235822		13.3426	42.3871	3.28422e-05	0.410822	0.100546	7.15534e-05
13.4653	42.2462	0.268068	0.0206478	0.00377784	0.467954		13.3413	42.3873	0.358604	0.5	0.0262785	0.363456
13.4138	42.2382	0.23789	0.272118	0.0433396	0.0733997		13.3319	42.3888	0.289297	0.00983488	0.00102647	0.235863
13.4603	42.2455	0.561602	0.425711	0.00286268	0.529325		13.3429	42.387	0.0684453	0.5	0.00280018	0.304261
13.4721	42.2473	0.113177	0.120662	0.161233	0.0591452		13.3413	42.3873	0.315374	0.5	0.0114457	0.692747
13.4726	42.2474	3.38686e-12	0.0281014	0.00867233	5.04198e-10		13.3319	42.3888	0.0419036	0.5	0.00876614	0.0142932
13.3835	42.2335	0.303585	0.0751483	0.530496	0.199748		13.4681	42.3668	0.0669267	0.246711	0.624343	0.0893078
13.402	42.2364	0.277331	0.171811	0.365104	0.321225		13.4575	42.3685	0.00277631	0.292019	0.612899	0.00103961
13.4137	42.2383	0.191921	0.5	0.0785244	0.276278		13.3414	42.3872	0.144446	0.5	0.0691196	0.109537
13.4648	42.2462	0.107983	0.168881	0.00417721	0.0559653		13.4681	42.3668	0.187738	0.392937	0.312918	0.13841
13.4721	42.2473	0.0765385	0.161672	0.00345812	0.0312996		13.4583	42.3683	0.00247202	0.154708	0.321726	0.00168207
13.3941	42.2352	0.221165	0.0235808	0.0607132	0.069596		13.4575	42.3685	0.494271	0.001	7.58709e-05	0.766964
13.4642	42.2461	0.818809	0.0969381	0.00851967	0.734826		13.4341	42.3723	6.8779e-12	0.147993	0.040086	1.13219e-08
13.4645	42.2462	0.500686	0.5	0.221861	0.680857		13.3414	42.3872	0.74088	0.5	0.00794166	0.797306
13.4721	42.2474	0.147162	0.0104779	0.025189	0.133611		13.4574	42.3684	2.09803e-10	0.449104	0.677976	1.79575e-08
13.4853	42.2494	0.0427814	0.5	0.032338	0.0591452		13.3642	42.3835	2.8696e-05	0.5	0.358942	0.000116908
13.3942	42.2353	0.0464457	0.337565	0.247023	0.133611		13.3443	42.3867	0.695631	0.5	0.0449838	0.968481
13.4065	42.2372	0.341482	0.5	0.36013	0.24552		13.3414	42.3872	0.736684	0.5	0.155483	0.921311
13.4415	42.2427	0.305514	0.316779	0.0196828	0.397117		13.3407	42.3873	0.902103	0.0798544	0.0485452	0.722127
13.4601	42.2455	0.467571	0.0742127	0.00471218	0.287091		13.4641	42.3673	0.448214	0.0648156	0.226273	0.118579
13.4642	42.2462	0.630861	0.0319267	0.000404295	0.827629		13.4574	42.3684	3.28647e-06	0.5	0.569713	1.17324e-06
13.4645	42.2462	0.819363	0.00597488	0.1295	0.645745		13.3641	42.3835	1.39767e-05	0.0307966	0.869103	1.97757e-05
13.4721	42.2474	0.00244811	0.0381495	0.00990507	0.000646496		13.355	42.3849	0.793813	0.5	0.361154	0.952737
13.4741	42.2477	0.282923	0.0166577	0.0268792	0.208365		13.3542	42.3851	0.0201806	0.5	0.812692	0.0255828
13.4853	42.2495	0.0246763	0.0233435	0.0320426	0.0177407		13.348	42.3861	0.00927774	0.168892	0.0249697	0.00472537
13.5012	42.252	0.423973	0.46084	0.0285278	0.482917		13.3449	42.3866	0.380106	0.00935449	0.393031	0.268569
13.3943	42.2353	0.000144936	0.5	0.413182	0.000494165		13.3443	42.3867	0.196203	0.5	0.199989	0.220611
13.4011	42.2364	0.134137	0.353848	0.866473	0.0815173		13.3434	42.3868	0.186143	0.2993	0.330152	0.118579
13.4064	42.2372	0.480143	0.492861	0.1065	0.611405		13.3421	42.387	0.0965581	0.5	0.499485	0.0970055
13.4399	42.2424	0.0655481	0.467134	0.240218	0.0472684		13.3414	42.3871	0.337819	0.5	0.000754011	0.213256
13.4435	42.243	0.983803	0.5	0.0842417	0.645745		13.3407	42.3872	0.172914	0.5	0.0213922	0.260114
13.4601	42.2456	0.433269	0.401636	0.0723167	0.217247		13.4641	42.3673	0.57571	0.360172	0.0299345	0.843385
13.4621	42.2459	0.815257	0.3679	0.549552	0.438813		13.358	42.3844	0.817462	0.321791	0.0666202	0.782094
13.4641	42.2462	0.865503	0.433238	0.0404091	0.980698		13.3579	42.3844	0.2523	0.5	0.711762	0.353119
13.4645	42.2463	0.48402	0.0702097	0.0889138	0.594544		13.3542	42.385	0.0405324	0.0153954	0.133941	0.00721214
13.4656	42.2464	0.182825	0.00759354	0.00366887	0.0421259		13.3449	42.3865	0.102084	0.281058	0.541837	0.0632951
13.4657	42.2464	0.487596	0.5	0.0552776	0.663209		13.3443	42.3866	0.0529988	0.401731	0.0933196	0.0691253
13.4684	42.2469	0.270366	0.5	0.0126124	0.424642		13.3421	42.387	0.551189	0.0972606	0.208227	0.553385
13.4685	42.2469	0.653685	0.00172813	0.0259281	0.680857		13.3413	42.3871	0.402303	0.0734581	0.235984	0.580138
13.4721	42.2475	4.45469e-05	0.109977	0.000715348	5.33703e-05		13.3413	42.3871	0.261107	0.5	0.613192	0.295056
13.3942	42.2354	0.000121369	0.5	0.309393	0.000375856		13.4641	42.3673	0.546102	0.5	0.0121142	0.607483
13.401	42.2364	0.196891	0.0940914	0.944091	0.115813		13.358	42.3844	0.501479	0.22031	0.875076	0.429375
13.4064	42.2373	0.195371	0.5	0.0862849	0.175465		13.358	42.3844	0.53549	0.5	0.645291	0.766964
13.4399	42.2425	0.391598	0.393594	0.813025	0.370697		13.3541	42.385	0.108859	0.330649	0.786083	0.060536
13.4444	42.2432	0.235799	0.451742	0.0498813	0.321225		13.3529	42.3852	0.245202	0.5	0.948586	0.38469
13.4542	42.2447	0.853621	0.0200296	0.850702	0.424642		13.3448	42.3865	0.786653	0.0942827	0.655911	0.527251
13.462	42.2459	0.285984	0.5	0.658297	0.24552		13.4713	42.3661	0.000238667	0.44398	0.95853	0.000277766
13.4637	42.2462	0.405934	0.0443418	0.629354	0.529325		13.4641	42.3672	0.500319	0.306378	0.0235386	0.692747
13.4685	42.2469	0.61868	0.00306915	0.0111882	0.771568		13.3448	42.3865	0.0158569	0.172352	0.115407	0.038039
13.4721	42.2475	2.75967e-05	0.13685	0.0786196	0.000119668		13.4712	42.366	0.000108095	0.20217	0.851475	9.16142e-05
13.4721	42.2475	0.000592318	0.00325772	0.10504	1.84977e-05		13.4712	42.366	0.0368678	0.5	0.650687	0.036243
13.4741	42.2478	0.177826	0.0808085	0.0844797	0.191395		13.3318	42.3885	0.000355597	0.238425	0.000177581	0.000126711
13.5012	42.252	0.934572	0.5	0.0849363	0.903716		13.344	42.3865	0.276932	0.27101	0.146385	0.464785
13.401	42.2365	0.058636	0.5	0.307692	0.0127042		13.3342	42.3881	0.929568	0.5	0.0731753	1
13.4133	42.2384	0.125274	0.5	0.290287	0.0446347		13.3539	42.3849	0.565439	0.5	0.454099	0.540239
13.4687	42.247	0.656308	0.5	0.315492	0.961407		13.3471	42.386	0.00633073	0.201707	0.4255	0.0418588
13.4721	42.2475	0.000418313	0.0966364	0.0271705	0.000214208		13.344	42.3865	0.894938	0.0954138	0.0161572	0.593739
13.474	42.2478	3.18864e-07	0.0202435	0.0564422	1.3331e-07		13.3342	42.3881	0.00376913	0.5	0.259858	0.0208045
13.4982	42.2516	0.0883326	0.5	4.48054e-05	0.069596		13.3539	42.3848	0.0616406	0.394787	0.615495	0.0661573
13.5012	42.2521	0.0297991	0.00152659	0.0264149	0.00430555		13.3449	42.3863	0.00533577	0.5	0.403275	0.00417411
13.4115	42.2381	0.99381	0.149288	0.157648	0.698682		13.3416	42.3868	0.114376	0.383343	0.00637948	0.0753896
13.4175	42.2391	0.594972	0.5	0.0188802	0.594544		13.3416	42.3868	0.598903	0.367157	0.184367	0.251846
13.4179	42.2391	0.235302	0.257441	0.397701	0.146606		13.3342	42.388	0.010693	0.5	0.993204	0.0135277
13.4502	42.2442	0.547873	0.447282	0.754355	0.980698		13.4693	42.3662	0.0403136	0.340051	0.164122	0.17282
13.4523	42.2445	0.465568	0.0124303	0.25127	0.846528		13.3534	42.3849	0.397691	0.37842	0.186672	0.353119
13.4547	42.2449	0.0479611	0.380848	0.0861707	0.069596		13.3449	42.3863	0.00627601	0.0191011	0.221882	0.00368183
13.4686	42.247	0.130462	0.451383	0.0212421	0.453251		13.3431	42.3866	0.0372719	0.5	0.00831055	0.0821098
13.4687	42.247	0.129859	0.5	0.143046	0.0733997		13.3415	42.3868	0.306608	0.5	0.00063554	0.843385
13.4724	42.2476	0.335266	0.0185869	0.136856	0.199748		13.4692	42.3662	0.238765	0.415552	0.216193	0.179128
13.4982	42.2516	0.0323392	0.10859	6.61517e-06	0.0127042		13.3451	42.3862	0.607603	0.5	0.390659	0.707382
13.5012	42.2521	0.0304831	0.338711	0.0950171	0.0110744		13.343	42.3865	0.00409396	0.199607	0.566934	0.00502502
13.3829	42.2337	0.330401	0.0329743	0.861171	0.105022		13.3431	42.3865	0.896927	0.253483	0.0160394	0.937012
13.4522	42.2445	0.771664	0.188244	0.000496431	0.276278		13.4692	42.3661	0.813507	0.287266	0.00956539	0.921311
13.4687	42.2471	0.371115	0.5	0.00235795	0.183302		13.4673	42.3664	0.850413	0.0726349	0.400856	1
13.4719	42.2476	0.952839	0.0773177	0.0101088	0.865516		13.4613	42.3674	0.925856	0.5	0.273743	0.313655
13.4982	42.2517	0.0185097	0.426316	0.033466	0.00963304		13.3451	42.3862	0.0180239	0.184942	0.659126	0.0150967
13.5011	42.2521	0.252758	0.5	0.373272	0.208365		13.343	42.3865	0.0179821	0.349377	0.0219663	0.038039
13.398	42.2361	0.711381	0.108213	0.372667	0.884583		13.343	42.3865	0.670108	0.375002	0.348016	0.812596
13.3981	42.2361	0.19981	0.277178	0.607764	0.513607		13.3428	42.3865	0.212337	0.0558221	0.0285245	0.323238
13.4007	42.2365	0.382187	0.5	0.81655	0.884583		13.4692	42.3661	0.22139	0.5	0.0638384	0.295056
13.4515	42.2444	0.658223	0.114573	0.0127527	0.611405		13.4673	42.3664	0.731742	0.5	0.818742	1
13.4515	42.2444	0.319388	0.444487	0.2096	0.397117		13.4613	42.3674	0.37835	0.5	0.568124	0.580138
13.4522	42.2445	0.978806	0.0465734	0.00236444	0.383768		13.3569	42.3842	0.00062775	0.5	0.443338	0.00111481
13.4562	42.2452	0.815024	0.0158807	0.0133756	0.698682		13.345	42.3861	0.000292576	0.0828196	0.640512	0.000506779
13.4707	42.2474	0.467928	0.119746	0.328637	0.321225		13.3448	42.3862	0.000654111	0.5	0.1994	0.00168207
13.4718	42.2476	0.71425	0.0713709	0.002017	0.753127		13.3428	42.3865	0.923544	0.5	0.00299499	0.858873
13.5011	42.2522	0.110031	0.00484858	0.059979	0.121526		13.4673	42.3664	0.467882	0.255406	0.0383634	0.843385
13.398	42.2361	0.191146	0.5	0.799864	0.133611		13.4595	42.3676	5.88667e-08	0.5	0.636989	1.29612e-06
13.3981	42.2361	0.728963	0.274233	0.833035	0.645745		13.3482	42.3856	0.0145279	0.0531659	0.827328	0.00128051
13.4005	42.2365	0.166284	0.339702	0.976575	0.160546		13.3448	42.3861	0.0222206	0.5	0.0620537	0.0459983
13.4006	42.2365	0.0435155	0.0110961	0.0452337	0.00316094		13.4595	42.3676	9.76909e-07	0.5	0.812642	3.43749e-06
13.4099	42.238	0.805823	0.5	0.0393362	0.594544		13.4578	42.3679	6.06682e-07	0.042121	0.822965	3.10535e-07
13.4449	42.2434	0.0900099	0.202618	0.485597	0.235822		13.3449	42.3861	0.108219	0.319115	0.508711	0.0856477
13.4515	42.2445	0.698468	0.5	0.00960215	0.482917		13.3422	42.3865	0.689134	0.5	0.00316746	0.580138
13.464	42.2464	0.326522	0.030351	0.117865	0.309564		13.4598	42.3675	0.028144	0.134309	0.591818	0.0121047
13.4691	42.2472	0.662323	0.015791	0.0174282	0.467954		13.4594	42.3676	0.000806698	0.5	0.806635	0.000678503
13.4691	42.2472	0.265216	0.00105777	0.000137137	0.0446347		13.4578	42.3678	1.87434e-11	0.0693613	0.963739	8.96947e-09
13.496	42.2514	0.657533	0.5	0.131423	0.961407		13.3449	42.386	0.00704782	0.5	0.0793467	0.00679673
13.394	42.2355	0.239135	0.040683	0.109193	0.127457		13.3447	42.3861	0.00028503	0.36259	0.0673647	0.000257226
13.3971	42.236	0.0437217	0.00423268	0.0546854	0.00195622		13.3422	42.3865	0.740348	0.255798	0.0291423	0.593739
13.3975	42.2361	0.490096	0.113154	0.0626328	0.255494		13.3404	42.3868	0.00573298	0.5	0.0144466	0.00679673
13.398	42.2362	0.0697779	0.269932	0.15374	0.0903485		13.4667	42.3663	0.0117556	0.5	0.945661	0.0187217
13.4005	42.2366	0.205315	0.317999	0.36594	0.139993		13.4668	42.3663	0.067508	0.0333652	0.818214	0.032867
13.4131	42.2385	0.713297	0.00591738	0.0104862	0.345397		13.4614	42.3672	7.8609e-06	0.5	0.390043	0.000238117
13.4449	42.2435	0.111015	0.173858	0.651677	0.0733997		13.4578	42.3678	0.00392051	0.5	0.944444	0.00192365
13.464	42.2465	0.957683	0.308485	0.5048	0.865516		13.3457	42.3859	0.0406275	0.5	0.293295	0.0345197
13.4691	42.2473	0.505871	0.001	0.0194023	0.498136		13.3448	42.386	0.0564114	0.319272	0.240539	0.0459983
13.4694	42.2473	0.490117	0.14454	0.132412	0.577899		13.3446	42.386	0.0116503	0.5	0.630916	0.0243069
13.4722	42.2477	0.963059	0.0963508	0.390113	1		13.3404	42.3867	0.0090922	0.272337	0.00028973	0.00859852
13.496	42.2514	0.94063	0.0606786	0.00110608	0.545283		13.4667	42.3663	0.9549	0.147316	0.0637051	0.921311
13.3766	42.2329	0.33365	0.0995085	0.134594	0.0815173		13.4668	42.3663	0.00308482	0.0436425	0.832644	0.00567637
13.394	42.2356	0.13036	0.5	0.998302	0.105022		13.4614	42.3672	0.0181344	0.0700539	0.592914	0.00911101
13.3966	42.236	0.00343558	0.124897	0.428004	0.00539783		13.3457	42.3858	0.802213	0.5	0.289492	0.766964
13.4005	42.2366	0.0397655	0.5	0.736033	0.0353039		13.4598	42.3674	3.73537e-08	0.0342332	0.800502	7.71058e-08
13.4006	42.2366	0.323762	0.265442	0.588618	0.139993		13.3563	42.3841	0.0046217	0.5	0.543884	0.00965058
13.4013	42.2367	0.0800548	0.111277	0.138745	0.0815173		13.3544	42.3844	0.119784	0.401963	0.366475	0.101049
13.4395	42.2427	0.520297	0.5	0.214027	0.663209		13.3478	42.3855	0.000276012	0.305524	0.280743	0.000148687
13.4691	42.2473	0.136251	0.0328582	0.359424	0.199748		13.4598	42.3674	1.59461e-07	0.5	0.872721	8.00787e-06
13.4693	42.2473	0.427098	0.0801227	0.000157961	0.698682		13.3544	42.3844	0.0762739	0.5	0.366491	0.0856477
13.4694	42.2473	0.403683	0.491824	0.0558799	0.309564		13.3478	42.3854	0.00446739	0.119345	0.0342186	0.000238117
13.4722	42.2478	0.606529	0.272074	0.025713	0.287091		13.3458	42.3857	0.0100465	0.5	0.274512	0.0102185
13.4958	42.2514	0.81004	0.00252029	0.325113	0.771568		13.3458	42.3857	0.000230912	0.481981	0.350324	0.000631114
13.3766	42.2329	0.926858	0.001	0.383644	0.513607		13.3452	42.3858	0.468102	0.379246	0.204468	0.952737
13.3974	42.2361	0.856046	0.00172479	0.0841548	0.942139		13.4575	42.3677	7.47068e-11	0.300682	0.246994	1.00792e-08
13.401	42.2367	0.37031	0.5	0.349642	0.309564		13.3544	42.3843	0.862005	0.5	0.292863	0.843385
13.3975	42.2362	0.84477	0.316073	0.216627	0.357906		13.3458	42.3857	0.000265036	0.5	0.286531	0.000470691
13.4009	42.2367	0.228358	0.5	0.495763	0.127457		13.3451	42.3858	0.368951	0.5	0.248647	0.649541
13.4015	42.2368	0.43165	0.5	0.00430964	0.545283		13.467	42.3661	0.573619	0.241259	0.278935	0.751923
13.4541	42.245	0.800988	0.0539805	0.115843	0.577899		13.4575	42.3676	5.83653e-07	0.402279	0.350743	7.30063e-06
13.4592	42.2458	0.43633	0.176883	0.00918189	0.438813		13.4573	42.3676	3.33313e-08	0.5	0.997844	2.83096e-08
13.4617	42.2462	0.4216	0.367641	0.0560832	0.183302		13.4196	42.3737	1.71477e-08	0.105698	0.357329	8.60229e-08
13.4702	42.2475	0.0511777	0.5	0.0850658	0.0559653		13.358	42.3837	0.00223975	0.5	0.15208	0.00168207
13.4703	42.2475	0.0364042	0.5	0.228341	0.052929		13.3571	42.3838	0.00515681	0.40946	0.180494	0.0168237
13.4718	42.2478	0.600066	0.001	0.0408698	0.790138		13.3561	42.384	0.182351	0.5	0.314846	0.235863
13.4719	42.2478	0.196619	0.0747485	0.0101385	0.160546		13.356	42.384	0.0188148	0.251499	0.0528197	0.220611
13.4983	42.2519	0.752257	0.317706	0.0514369	0.498136		13.3457	42.3856	0.0113774	0.249739	0.798484	0.0102185
13.401	42.2368	0.936898	0.421222	0.0909671	0.383768		13.3456	42.3857	0.256231	0.409677	0.162093	0.199081
13.4136	42.2387	0.396351	0.5	0.490227	0.370697		13.3428	42.3861	0.142679	0.303301	0.588596	0.113987
13.4541	42.2451	0.664492	0.0170178	0.264819	0.611405		13.467	42.366	0.768887	0.0247663	0.523696	0.593739
13.4591	42.2458	0.319623	0.107434	0.0232835	0.397117		13.4666	42.3661	0.877927	0.400173	0.209723	0.905641
13.4637	42.2466	0.830425	0.11186	0.341752	0.594544		13.4572	42.3676	2.8635e-11	0.0580066	0.738057	1.90177e-09
13.4703	42.2476	0.829928	0.202416	0.0155209	0.961407		13.3571	42.3838	0.0107452	0.090885	0.876602	0.00304184
13.4719	42.2478	0.208523	0.0148085	0.0193019	0.0591452		13.356	42.3839	0.0189745	0.5	0.643709	0.118579
13.4983	42.2519	0.377447	0.302633	0.00328281	0.183302		13.3458	42.3856	0.0161619	0.5	0.0446277	0.0121047
13.3973	42.2362	0.685684	0.5	0.0448384	0.771568		13.3428	42.3861	0.124823	0.5	0.0697943	0.160702
13.401	42.2368	0.651846	0.5	0.120715	0.333169		13.467	42.366	0.206649	0.5	0.67261	0.41793
13.4096	42.2382	0.912101	0.5	0.289056	0.942139		13.4666	42.3661	0.0632767	0.0216773	0.154325	0.0230865
13.4129	42.2387	0.968882	0.410225	5.26089e-05	0.333169		13.4483	42.369	0.00179141	0.5	0.00801314	0.000841254
13.4136	42.2388	0.457681	0.0124039	0.490322	0.383768		13.362	42.383	6.16507e-05	0.0688344	0.241439	0.000126711
13.4541	42.2451	0.807016	0.268416	0.23026	1		13.3458	42.3856	0.000798849	0.115586	0.894598	0.000841254
13.4637	42.2466	0.626639	0.191222	0.0201185	0.663209		13.3409	42.3863	0.840269	0.131155	0.00914183	0.858873
13.4737	42.2482	0.0964012	0.0397165	0.0227816	0.139993		13.467	42.366	0.013828	0.131356	0.139717	0.0177505
13.4979	42.2519	0.734987	0.0083108	0.0106092	0.513607		13.4667	42.366	0.342046	0.0199355	0.581528	0.722127
13.3929	42.2356	0.260269	0.5	0.724646	0.276278		13.4669	42.366	0.163926	0.5	0.355511	0.489265
13.3973	42.2363	0.581021	0.296996	0.378984	0.716675		13.4579	42.3674	6.19642e-11	0.307795	0.00219108	3.16915e-08
13.401	42.2369	0.773497	0.0697452	0.019712	0.808829		13.4499	42.3687	0.00340166	0.5	0.047991	0.00157205
13.4636	42.2466	0.258503	0.0540266	0.00124519	0.321225		13.4483	42.369	0.00110759	0.357242	0.0308322	0.000729183
13.471	42.2478	0.89425	0.0104999	0.138912	0.942139		13.3459	42.3855	6.2876e-05	0.0627643	0.42342	2.57483e-05
13.4727	42.248	4.65892e-05	0.0227243	0.0232494	4.81668e-06		13.3459	42.3855	6.53133e-06	0.357583	0.235769	8.00787e-06
13.4737	42.2482	0.419526	0.206666	0.00929741	0.980698		13.3409	42.3863	0.885684	0.5	0.00140524	0.921311
13.3928	42.2356	0.422718	0.0638494	0.635315	0.453251		13.4668	42.366	0.601467	0.5	0.569115	0.476939
13.3939	42.2358	0.278074	0.266339	0.822863	0.482917		13.4668	42.366	0.765562	0.015471	0.835884	0.937012
13.4593	42.246	0.0606898	0.347935	0.438088	0.0312996		13.3585	42.3834	0.00108344	0.5	0.513184	0.00502502
13.4593	42.246	0.460594	0.0050825	0.0138444	0.287091		13.3579	42.3835	0.0313582	0.469369	0.365686	0.0399101
13.464	42.2467	0.781764	0.44324	0.0251537	0.808829		13.3532	42.3843	0.0220509	0.5	0.337661	0.060536
13.471	42.2478	0.670187	0.001	0.436476	0.903716		13.3459	42.3855	0.00133055	0.0727488	0.703269	0.00111481
13.4727	42.2481	9.28818e-06	0.0188767	0.0332665	9.53513e-06		13.3459	42.3855	3.40397e-06	0.406711	0.525426	1.65543e-05
13.3762	42.2331	0.0537847	0.122698	0.0325004	0.0374648		13.3434	42.3859	0.00754018	0.5	0.738336	0.0150967
13.3916	42.2355	0.478873	0.451713	0.801921	0.808829		13.4668	42.3659	0.617204	0.132155	0.801563	0.553385
13.3938	42.2358	0.692588	0.354678	0.444372	1		13.358	42.3835	0.527937	0.434001	0.601123	0.607483
13.3971	42.2363	0.760072	0.5	0.662107	1		13.3578	42.3835	0.0737555	0.10643	0.116533	0.0345197
13.3975	42.2364	0.845501	0.0640006	0.459953	0.942139		13.3555	42.3839	0.904737	0.386273	0.638645	0.692747
13.4593	42.246	0.263346	0.114811	0.931459	0.115813		13.3543	42.3841	0.562261	0.5	0.0532466	0.323238
13.464	42.2467	0.500558	0.5	0.161832	0.24552		13.3532	42.3842	0.105393	0.5	0.281201	0.0821098
13.471	42.2478	0.812448	0.0362837	0.00965796	0.790138		13.3463	42.3854	0.0025489	0.15611	0.43678	0.000470691
13.3971	42.2364	0.107206	0.0648131	0.392988	0.029448		13.3432	42.3859	0.000241529	0.296301	0.395294	0.000148687
13.3974	42.2364	0.176543	0.233228	0.216273	0.0332502		13.341	42.3862	0.187892	0.5	0.151876	0.228146
13.3998	42.2368	0.710064	0.242699	0.238566	0.942139		13.3405	42.3863	0.947079	0.36269	0.00469404	0.37398
13.4419	42.2433	0.637138	0.0221265	0.457325	0.637085		13.4668	42.3659	0.88278	0.5	0.457327	0.858873
13.4424	42.2434	0.127739	0.0463403	0.164957	0.0127042		13.4596	42.367	0.400123	0.154222	0.580912	0.41793
13.3915	42.2355	0.264878	0.370841	0.356063	0.0773718		13.4573	42.3674	7.3605e-14	0.5	0.625385	1.31747e-09
13.3974	42.2364	0.436455	0.260557	0.110851	0.321225		13.3563	42.3837	0.0686485	0.5	0.429645	0.0528507
13.3998	42.2368	0.0155593	0.5	0.494079	0.0500316		13.3555	42.3838	0.701912	0.171667	0.46248	0.37398
13.4418	42.2434	0.276672	0.166779	0.430268	0.611405		13.354	42.3841	0.0133082	0.0494466	0.165114	0.0108159
13.471	42.2479	0.988492	0.00445167	0.63808	0.513607		13.3463	42.3853	0.955375	0.0268767	0.278484	0.313655
13.4729	42.2482	0.238556	0.5	0.202001	0.287091		13.3432	42.3858	0.0019563	0.070547	0.0179117	0.00157205
13.501	42.2526	0.327232	0.5	0.431827	0.453251		13.3431	42.3858	0.0666339	0.5	0.0852915	0.036243
13.3915	42.2356	0.735893	0.0124604	0.47454	0.753127		13.341	42.3862	0.82792	0.5	0.0965224	0.905641
13.3936	42.2359	0.577963	0.5	0.00566275	0.453251		13.3405	42.3863	0.799214	0.0300822	0.108793	0.527251
13.4097	42.2384	0.218816	0.265209	0.383659	0.175465		13.4668	42.3658	0.329995	0.5	0.220635	0.635388
13.4131	42.2389	0.0895845	0.5	0.0713633	0.0858411		13.4573	42.3674	1.34032e-12	0.113171	0.745357	6.25804e-10
13.457	42.2458	0.900319	0.5	0.0759736	0.498136		13.3555	42.3838	0.261696	0.315616	0.212969	0.0553164
13.4711	42.248	0.979445	0.33157	0.0529692	0.645745		13.3539	42.3841	0.323592	0.283929	0.113251	0.166678
13.501	42.2526	0.147469	0.485754	0.00427575	0.383768		13.3539	42.3841	0.275685	0.5	0.408989	0.313655
13.3923	42.2357	0.794411	0.5	0.358893	0.645745		13.3436	42.3857	0.273487	0.34572	0.098713	0.185607
13.3935	42.2359	0.666114	0.171705	0.338379	0.716675		13.3432	42.3858	0.0297255	0.0910467	0.00964238	0.029764
13.3967	42.2364	0.0140843	0.39549	0.248812	0.0500316		13.3404	42.3862	0.0774227	0.5	0.0485957	0.13841
13.3976	42.2365	0.663188	0.19346	0.248925	0.884583		13.4672	42.3657	0.199717	0.00688869	0.328933	0.33301
13.4005	42.237	0.0483058	0.001	0.103444	0.00778368		13.4712	42.365	0.661107	0.5	0.185945	1
13.413	42.239	0.0139394	0.357862	0.139492	0.00625903		13.4672	42.3657	0.279512	0.5	0.741572	0.251846
13.415	42.2393	0.941203	0.206179	0.0240113	0.846528		13.4505	42.3684	1.03525e-06	0.266587	0.628846	2.83681e-06
13.4569	42.2458	0.631663	0.5	0.196851	0.529325		13.3559	42.3837	0.695394	0.5	0.478164	0.827958
13.457	42.2458	0.488011	0.5	0.4196	0.680857		13.3534	42.3841	0.13307	0.366339	0.484385	0.15489
13.4704	42.2479	0.288953	0.5	0.133929	0.24552		13.345	42.3854	0.0979281	0.458204	0.604906	0.0243069
13.4711	42.248	0.832409	0.0360806	0.26988	0.827629		13.328	42.3882	5.08701e-05	0.136142	0.00382616	0.000203827
13.473	42.2483	2.8316e-11	0.057557	0.150231	2.43097e-11		13.4672	42.3657	0.072811	0.5	0.0675534	0.032867
13.4883	42.2507	0.352186	0.420874	0.0817008	0.545283		13.4662	42.3658	0.317144	0.190786	0.673763	0.621368
13.501	42.2527	0.223749	0.443443	0.0462153	0.160546		13.4662	42.3658	7.39005e-06	0.11363	0.32978	3.34122e-05
13.3967	42.2364	0.00872637	0.0923951	0.889677	0.00778368		13.4655	42.3659	8.43353e-07	0.5	0.0507275	6.65336e-06
13.3976	42.2366	0.243574	0.5	0.183438	0.235822		13.3449	42.3854	0.0078848	0.5	0.335264	0.00811197
13.4569	42.2458	0.701594	0.5	0.0204345	0.698682		13.3412	42.386	0.587491	0.5	0.00220951	0.429375
13.4599	42.2463	0.183709	0.0587565	0.247131	0.121526		13.3281	42.3881	0.78844	0.310353	0.0088357	0.607483
13.4726	42.2483	0.350156	0.0227963	0.00849823	0.0733997		13.328	42.3881	8.01269e-05	0.491447	0.00320206	0.000678503
13.473	42.2483	1.19099e-12	0.5	0.121304	1.25832e-09		13.4662	42.3658	0.00049402	0.5	0.41115	0.00137163
13.3768	42.2334	0.933428	0.0599499	0.015103	0.645745		13.3411	42.386	0.191606	0.381609	0.000404079	0.143746
13.3975	42.2366	0.925143	0.5	0.00422779	0.827629		13.4335	42.371	0.0213503	0.0103309	0.0120672	0.00345604
13.4155	42.2394	0.090569	0.267689	0.217153	0.0202007		13.3411	42.3859	0.442747	0.5	0.000190503	0.323238
13.4728	42.2484	0.079198	0.153127	0.221106	0.167881		13.3401	42.3861	0.189237	0.5	0.223983	0.0578773
13.473	42.2484	3.36816e-10	0.317284	0.00455494	1.30408e-08		13.4653	42.3659	0.000152335	0.5	0.427738	0.000437012
13.4732	42.2484	0.186675	0.0115965	0.32022	0.167881		13.4593	42.3668	0.00720713	0.296324	0.914984	0.0108159
13.3766	42.2334	0.273874	0.294304	0.0017811	0.199748		13.4575	42.3671	0.000137455	0.141919	0.0689832	5.11987e-05
13.3767	42.2334	0.636128	0.409037	0.91906	0.716675		13.3567	42.3834	0.153057	0.0640273	0.742759	0.15489
13.3914	42.2357	0.348895	0.5	0.64922	0.397117		13.3411	42.3859	0.767198	0.390685	0.00116102	0.968481
13.3975	42.2366	0.783493	0.5	0.672413	0.903716		13.3398	42.3861	0.0340877	0.255908	0.00736454	0.0722018
13.4134	42.2391	0.510674	0.5	0.505745	0.383768		13.4654	42.3658	0.000672074	0.42124	0.911718	0.000277766
13.4731	42.2484	0.468603	0.125551	0.0886502	0.594544		13.4653	42.3658	4.05439e-05	0.5	0.306514	0.000160976
13.3767	42.2334	0.727569	0.0960388	0.804305	0.424642		13.4642	42.366	0.490866	0.067605	0.805887	0.395586
13.3919	42.2358	0.0348971	0.5	0.159964	0.0244478		13.3421	42.3857	0.0959211	0.5	0.01828	0.0528507
13.4635	42.247	0.50699	0.5	0.0166639	0.884583		13.3398	42.3861	0.00232512	0.163545	0.0204785	0.00345604
13.4684	42.2477	0.502983	0.5	0.971055	0.410743		13.333	42.3872	0.00609193	0.412087	0.000217452	0.0283093
13.3767	42.2335	0.45714	0.367344	0.259418	0.0773718		13.4683	42.3653	0.0232695	0.22904	0.0719816	0.036243
13.3919	42.2358	0.0229697	0.459491	0.851957	0.0215387		13.4642	42.366	0.0141702	0.5	0.594651	0.00911101
13.4538	42.2455	0.131056	0.206767	0.0411411	0.0559653		13.4165	42.3737	0.000817609	0.193749	0.793212	0.000126711
13.4559	42.2458	0.724897	0.479264	0.509136	1		13.3609	42.3826	0.00170476	0.108539	0.291285	0.00146869
13.4635	42.247	0.348656	0.5	0.000274287	0.942139		13.3567	42.3833	5.31927e-08	0.134887	0.916977	1.19181e-07
13.4732	42.2485	0.00282703	0.00545342	0.996553	0.000771198		13.3421	42.3857	0.0153242	0.239314	0.000828682	0.0108159
13.4733	42.2485	0.0176897	0.0544385	0.972452	0.00398868		13.333	42.3871	0.00171389	0.0255232	0.000303868	0.00392096
13.3916	42.2358	0.830499	0.0697538	0.126352	0.410743		13.4683	42.3653	0.0002976	0.5	0.951614	0.00128051
13.4117	42.239	0.751672	0.0240142	0.0362513	0.753127		13.4653	42.3658	0.0451239	0.00657632	0.412808	0.0553164
13.4539	42.2455	0.738428	0.49965	0.0028412	0.467954		13.4628	42.3662	1.94333e-05	0.111049	0.335487	0.000116908
13.4542	42.2456	0.0996132	0.113219	0.360608	0.0202007		13.4585	42.3669	3.08359e-09	0.5	0.769135	1.79575e-08
13.4559	42.2459	0.597396	0.34297	0.554561	0.903716		13.3452	42.3851	1.17545e-05	0.5	0.222719	1.15482e-05
13.4119	42.239	0.000511173	0.115655	0.028669	0.00316094		13.3421	42.3856	0.012052	0.209604	0.00137549	0.0076502
13.4598	42.2465	0.0699318	0.115066	0.0702242	0.0244478		13.4684	42.3652	0.000585986	0.299856	0.748786	0.000841254
13.4973	42.2523	0.536435	0.256421	0.0208583	0.498136		13.4653	42.3657	2.12202e-05	0.5	0.299427	5.56986e-05
13.4118	42.2391	0.463443	0.434261	0.0509589	0.397117		13.4629	42.3661	0.000577227	0.5	0.902465	0.000631114
13.4597	42.2465	0.15526	0.117127	0.320708	0.0773718		13.4585	42.3668	1.88511e-08	0.205225	0.360013	2.26441e-07
13.4636	42.2471	0.887952	0.407389	0.00151825	0.628475		13.4536	42.3676	0.330624	0.5	0.00978423	0.304261
13.4638	42.2472	0.710349	0.5	0.000676785	0.628475		13.4261	42.3721	7.59176e-06	0.102429	0.14697	9.60237e-07
13.4973	42.2524	0.103122	0.0340356	0.952997	0.0500316		13.426	42.3721	1.21183e-05	0.470382	0.259566	3.78183e-06
13.5077	42.254	0.628208	0.184738	0.540796	0.467954		13.3578	42.3831	1.1789e-06	0.438026	0.063236	2.33757e-06
13.3998	42.2372	0.428109	0.238271	0.378952	0.680857		13.3421	42.3856	0.0100704	0.090661	0.00410623	0.0108159
13.4	42.2373	0.262163	0.207393	0.31986	0.628475		13.3409	42.3858	0.771314	0.5	0.0724807	0.663821
13.4539	42.2457	0.916978	0.001	0.894406	0.903716		13.4629	42.3661	7.23748e-07	0.279154	0.878653	5.02465e-06
13.4597	42.2466	0.127593	0.0255957	0.925014	0.160546		13.4576	42.3669	1.58411e-09	0.448786	0.781997	1.47836e-07
13.4971	42.2524	0.284139	0.0875757	0.00779446	0.175465		13.4535	42.3676	0.000310125	0.5	0.769743	0.000174216
13.4973	42.2524	0.113952	0.0742639	0.785714	0.0260259		13.4261	42.372	1.31974e-07	0.0170576	0.0795852	3.96705e-08
13.5002	42.2529	0.0282643	0.001	0.00407854	0.000375856		13.426	42.372	1.91218e-07	0.5	0.474929	1.17324e-06
13.5077	42.254	0.385752	0.5	0.70229	0.265746		13.356	42.3833	0.297919	0.149844	0.844229	0.220611
13.4	42.2373	0.244957	0.00156125	0.0263745	0.255494		13.3451	42.3851	0.000592038	0.282713	0.00903724	0.000586819
13.4714	42.2484	0.560809	0.0284595	0.707231	0.680857		13.3446	42.3852	0.000135835	0.332314	0.0726525	0.000299834
13.4971	42.2524	0.235275	0.0283919	0.000252085	0.0446347		13.3441	42.3852	8.76219e-06	0.338667	0.0609028	1.97757e-05
13.5002	42.2529	0.371711	0.168949	3.64556e-06	0.0155472		13.3425	42.3855	0.00454767	0.5	0.514504	0.00285219
13.5004	42.2529	0.0850709	0.0802958	0.000430089	0.0472684		13.3421	42.3856	0.0938181	0.0158759	0.0955588	0.0345197
13.5077	42.2541	0.622388	0.0558405	0.712132	0.424642		13.4689	42.3651	0.545834	0.34665	0.916435	0.33301
13.3969	42.2368	0.854397	0.0190992	0.921731	0.942139		13.4686	42.3651	0.0007425	0.190453	0.202615	0.000405594
13.4714	42.2485	0.805687	0.5	0.974023	0.191395		13.4579	42.3668	0.000227281	0.5	0.756927	0.000506779
13.4756	42.2491	0.488943	0.00504045	0.106774	0.771568		13.4535	42.3676	0.000223065	0.31077	0.475852	0.000277766
13.5003	42.253	0.000678529	0.5	0.0862202	0.000646496		13.356	42.3833	0.755275	0.5	0.855963	0.540239
13.3968	42.2369	0.984752	0.082915	0.0263465	0.438813		13.3451	42.385	0.000181158	0.24261	0.0590641	0.000160976
13.4149	42.2397	0.245607	0.123225	0.15981	0.0659557		13.3446	42.3851	3.41152e-05	0.5	0.00259792	5.56986e-05
13.451	42.2453	0.617912	0.198355	0.937778	0.577899		13.3441	42.3852	0.000148347	0.44598	0.178757	0.00078336
13.4571	42.2463	0.839964	0.5	0.0502557	0.467954		13.3439	42.3852	0.0379592	0.5	0.381386	0.20608
13.46	42.2467	0.244055	0.275306	0.0699788	0.183302		13.3425	42.3854	0.0116205	0.5	0.061302	0.00472537
13.4756	42.2492	0.200664	0.0131931	0.785049	0.226399		13.3421	42.3855	0.710565	0.5	0.247316	0.692747
13.4888	42.2512	0.290097	0.0246167	0.0584756	0.265746		13.4692	42.365	0.0132549	0.0669784	0.576717	0.0159396
13.4965	42.2524	0.836545	0.0883668	0.162609	0.734826		13.4689	42.365	0.465045	0.5	0.298116	0.501761
13.4979	42.2526	0.549147	0.5	0.0595665	0.333169		13.4686	42.3651	0.014148	0.271049	0.481977	0.0243069
13.4989	42.2528	0.223709	0.0583643	0.210283	0.309564		13.465	42.3657	0.0590728	0.5	0.8546	0.0930928
13.5004	42.253	0.066333	0.236018	0.00178717	0.0903485		13.4584	42.3667	1.60451e-11	0.5	0.804253	7.97889e-09
13.396	42.2368	0.0549067	0.180378	0.732284	0.0559653		13.4579	42.3668	0.000507661	0.5	0.824851	0.00168207
13.3999	42.2374	0.334171	0.442579	0.0783071	0.383768		13.4576	42.3669	8.7358e-05	0.5	0.547457	0.000405594
13.4	42.2374	0.23879	0.5	0.026762	0.255494		13.4534	42.3675	5.74034e-08	0.5	0.290199	2.5756e-06
13.415	42.2397	0.699317	0.5	0.892449	0.716675		13.3569	42.3831	0.0978335	0.5	0.799327	0.235863
13.4396	42.2436	0.701085	0.149736	0.0396076	0.846528		13.345	42.385	0.000149886	0.0460149	0.0895958	3.96764e-05
13.4509	42.2453	0.599164	0.0499667	0.23155	0.611405		13.3446	42.3851	3.10202e-05	0.5	0.00309951	7.77265e-05
13.475	42.2491	0.305181	0.001	0.0622245	0.321225		13.3441	42.3852	0.00153751	0.185277	0.26962	0.00721214
13.4888	42.2513	0.530221	0.143805	0.00086664	0.321225		13.3439	42.3852	0.000188195	0.5	0.986295	0.000586819
13.4965	42.2524	0.475692	0.5	0.109061	0.255494		13.3421	42.3855	0.54399	0.5	0.0644318	0.514424
13.4966	42.2525	0.162405	0.5	0.00772653	0.0773718		13.3409	42.3857	0.326537	0.5	0.00277792	0.185607
13.4978	42.2526	0.0172373	0.134852	0.0117656	0.00625903		13.4692	42.3649	0.266765	0.0680699	0.257828	0.060536
13.499	42.2528	0.465884	0.185249	0.0508941	0.438813		13.4691	42.3649	6.92201e-06	0.227765	0.75723	5.56986e-05
13.5004	42.253	0.145028	0.5	0.392137	0.0659557		13.4689	42.365	0.000108912	0.5	0.965237	0.000257226
13.5075	42.2542	0.822845	0.5	0.00989054	0.645745		13.4658	42.3655	0.0148934	0.0346629	0.443297	0.0230865
13.4509	42.2454	0.781897	0.00180808	0.143803	0.438813		13.4647	42.3657	0.532981	0.5	0.0382617	0.441001
13.4965	42.2525	0.389121	0.162409	0.0820297	0.160546		13.4644	42.3657	0.236627	0.260906	0.541397	0.213256
13.4966	42.2525	0.343383	0.205768	0.00265509	0.167881		13.4584	42.3667	5.74965e-14	0.5	0.847563	3.33014e-10
13.5077	42.2542	0.194915	0.161241	0.274484	0.191395		13.3452	42.3849	0.426673	0.5	0.155335	0.580138
13.3911	42.2361	0.860645	0.130574	0.123302	0.424642		13.3443	42.3851	1.41254e-06	0.0175948	0.031889	4.1591e-06
13.3999	42.2375	0.514688	0.445154	0.290718	0.309564		13.3421	42.3855	0.1883	0.5	0.177865	0.228146
13.3999	42.2375	0.760052	0.5	0.0831833	0.790138		13.3408	42.3857	0.258333	0.285597	0.010014	0.166678
13.4526	42.2457	0.723803	0.212636	0.0484576	0.397117		13.3376	42.3862	0.310508	0.322558	0.000905303	0.0856477
13.4634	42.2474	0.234938	0.00619981	0.584889	0.287091		13.4694	42.3649	0.937065	0.477677	0.945612	0.751923
13.4755	42.2492	0.623183	0.117989	0.1027	0.771568		13.4686	42.365	0.10202	0.5	0.00695557	0.395586
13.4883	42.2512	0.801012	0.5	0.000846377	1		13.4653	42.3655	0.848456	0.5	0.474361	0.921311
13.4964	42.2525	0.254096	0.5	0.114188	0.139993		13.4647	42.3656	0.902206	0.153476	0.196889	0.812596
13.4965	42.2525	0.742687	0.0666783	0.95701	0.808829		13.4643	42.3657	0.00150967	0.5	0.0828605	0.00219672
13.4967	42.2526	0.483829	0.0156159	0.89698	0.255494		13.4635	42.3658	0.00085291	0.5	0.257697	0.00157205
13.3912	42.2361	0.262457	0.5	0.62322	0.287091		13.4584	42.3667	3.02035e-14	0.5	0.417299	1.99664e-10
13.3999	42.2375	0.271887	0.488739	0.658368	0.453251		13.3574	42.3829	0.00797563	0.5	0.0808892	0.00567637
13.4634	42.2474	0.434787	0.209037	0.0112301	0.884583		13.3445	42.385	0.000222266	0.298564	0.156662	0.000148687
13.4755	42.2493	0.422421	0.0349787	0.219679	0.827629		13.3443	42.3851	0.00551525	0.239954	0.143649	0.00679673
13.4967	42.2526	5.14649e-06	0.236674	0.0937802	1.19188e-05		13.3421	42.3854	0.644238	0.5	0.372432	0.464785
13.5079	42.2543	0.00225935	0.5	0.0043493	0.0145428		13.3377	42.3861	0.289339	0.0594391	0.000290721	0.0691253
13.5087	42.2544	0.0144422	0.079448	0.144405	0.0110744		13.4693	42.3648	0.712117	0.5	0.0151347	0.937012
13.457	42.2464	0.448424	0.0607578	0.530897	0.498136		13.4684	42.365	0.00279384	0.191582	0.363201	0.00304184
13.4712	42.2487	0.18886	0.00745713	0.170844	0.153456		13.4665	42.3653	0.848754	0.5	0.0363844	0.649541
13.4855	42.2509	0.846785	0.305865	0.00620096	1		13.4653	42.3655	0.0949352	0.5	0.634506	0.0399101
13.4884	42.2513	1.73409e-05	0.5	0.00376615	0.000132046		13.4653	42.3655	0.195272	0.5	0.136579	0.101049
13.4967	42.2526	0.00630658	0.0912349	0.0187424	0.00724201		13.4642	42.3657	0.000276761	0.0940314	0.224987	0.000729183
13.5079	42.2544	0.000333082	0.5	0.040378	0.00091793		13.418	42.3731	0.000171103	0.0260166	0.229422	1.15482e-05
13.5087	42.2545	0.000207152	0.5	0.00214023	0.00292196		13.3445	42.385	0.00389946	0.5	0.184381	0.00534173
13.4634	42.2475	0.974073	0.00669649	0.924744	0.611405		13.3443	42.385	0.000166631	0.268431	0.692225	0.000586819
13.4712	42.2487	0.226916	0.0480328	0.056956	0.235822		13.344	42.3851	0.096963	0.5	0.62883	0.160702
13.4712	42.2487	0.468616	0.48799	0.628095	0.529325		13.3377	42.3861	0.440404	0.347496	0.0110309	0.304261
13.4854	42.2509	0.319328	0.322723	0.124669	0.370697		13.4695	42.3648	0.509258	0.5	0.447613	0.395586
13.4884	42.2514	0.0417956	0.00667581	0.00694132	0.029448		13.4695	42.3648	0.460092	0.419602	0.563423	0.812596
13.4966	42.2527	0.875708	0.203968	0.0282051	0.397117		13.4684	42.365	0.0167265	0.122735	0.119844	0.0399101
13.4995	42.2531	1.8207e-08	0.478127	0.0560735	7.82963e-08		13.4653	42.3655	0.358614	0.239299	0.577467	0.464785
13.3993	42.2375	0.242121	0.377065	0.544563	0.410743		13.4575	42.3667	0.14458	0.295653	0.103945	0.0632951
13.4165	42.2402	0.0407324	0.5	0.170549	0.0446347		13.4574	42.3667	0.000371319	0.5	0.650192	0.000188476
13.4507	42.2455	0.837215	0.432487	0.510138	0.545283		13.4146	42.3736	3.22448e-06	0.5	0.361733	8.00787e-06
13.4557	42.2463	0.903887	0.203423	0.811916	0.884583		13.3565	42.383	0.939884	0.196251	0.685053	0.890007
13.4634	42.2475	0.656481	0.215298	0.045508	0.255494		13.3446	42.3849	0.017631	0.5	0.557912	0.032867
13.4884	42.2514	0.916008	0.0108842	0.285492	0.903716		13.344	42.385	0.015773	0.137843	0.335136	0.0243069
13.4966	42.2527	0.0110149	0.361936	0.129315	0.00230054		13.3382	42.386	3.36244e-10	0.482447	0.52336	3.5464e-08
13.3908	42.2362	0.62853	0.0169932	0.743884	0.208365		13.4695	42.3647	0.0630889	0.5	0.509533	0.0661573
13.3992	42.2375	0.677402	0.5	0.683504	0.529325		13.4694	42.3648	0.668286	0.5	0.963257	0.678225
13.3993	42.2375	0.0181763	0.5	0.30491	0.0624738		13.4658	42.3653	0.169879	0.197889	0.349853	0.133227
13.4884	42.2514	0.798408	0.34741	0.00633397	0.827629		13.4653	42.3654	0.00248318	0.5	0.976539	0.004442
13.4966	42.2527	0.205658	0.0747191	0.245532	0.0500316		13.4642	42.3656	0.767167	0.5	0.892993	0.607483
13.5075	42.2544	0.000319365	0.021076	0.27753	3.16408e-05		13.4575	42.3667	1.07882e-09	0.0812389	0.43235	2.83096e-08
13.3908	42.2363	0.299005	0.0332349	0.330361	0.175465		13.4574	42.3667	4.55218e-10	0.0869043	0.769751	6.30664e-09
13.3944	42.2368	0.0183393	0.430632	0.629291	0.0374648		13.4375	42.3699	6.34269e-05	0.00417351	0.438989	1.97757e-05
13.4126	42.2397	0.740542	0.133197	0.0182418	0.922905		13.4146	42.3736	3.68955e-08	0.0686763	0.987625	2.03661e-07
13.3906	42.2363	0.966936	0.152985	0.831399	0.424642		13.3439	42.385	0.00914509	0.477481	0.283373	0.0121047
13.4126	42.2397	0.952558	0.5	0.0925522	0.903716		13.3429	42.3852	0.00313868	0.5	0.357208	0.0060298
13.452	42.2458	0.803715	0.200997	0.00987892	0.370697		13.4689	42.3648	0.498566	0.168461	0.474591	0.323238
13.3751	42.2339	0.575953	0.0450372	0.0269434	0.424642		13.4667	42.3651	0.00168619	0.5	0.911441	0.00368183
13.3902	42.2362	0.0579914	0.245238	0.817138	0.0624738		13.4658	42.3653	0.271513	0.5	0.222175	0.353119
13.3906	42.2363	0.827009	0.227794	0.529899	0.628475		13.4642	42.3656	0.458685	0.398777	0.567053	0.295056
13.3971	42.2373	0.104301	0.144781	0.780454	0.217247		13.4639	42.3656	0.684802	0.5	0.0445739	0.937012
13.4114	42.2396	0.482118	0.0258275	0.0700306	0.438813		13.4375	42.3699	1.01908e-05	0.033554	0.86173	7.08984e-07
13.4403	42.2441	0.311247	0.186586	0.0100967	0.298186		13.3581	42.3827	0.344658	0.5	0.725353	0.527251
13.4634	42.2477	0.480528	0.118408	0.124683	0.208365		13.3439	42.385	0.36064	0.5	0.0694491	0.527251
13.4744	42.2494	0.00694975	0.195246	0.136659	0.00180242		13.3429	42.3851	0.00653948	0.31814	0.904921	0.00721214
13.5072	42.2545	0.00597176	0.5	0.141448	0.00836137		13.3391	42.3857	0.00175483	0.5	6.35555e-05	0.00502502
13.3901	42.2363	0.016437	0.5	0.557494	0.0127042		13.3323	42.3868	0.0106689	0.001	0.00530721	0.00103961
13.3909	42.2364	0.191935	0.131237	0.353522	0.208365		13.4671	42.3651	0.282328	0.00904179	0.420968	0.143746
13.3928	42.2367	0.455427	0.0187431	0.155456	0.808829		13.4667	42.3651	1.22409e-05	0.5	0.591877	0.000174216
13.4114	42.2396	0.919039	0.001	0.103137	0.383768		13.4638	42.3656	0.946293	0.5	0.334961	0.874416
13.4634	42.2477	0.252116	0.295071	0.228265	0.0500316		13.4534	42.3673	0.0167023	0.00559035	0.973126	0.000148687
13.4634	42.2477	0.561181	0.0242144	0.209466	0.383768		13.3567	42.3829	0.0808467	0.5	0.0302259	0.0930928
13.5072	42.2545	0.940923	0.196467	0.0160468	1		13.3391	42.3857	0.00273218	0.38422	0.00403651	0.0076502
13.391	42.2364	0.0328728	0.00149814	0.119849	0.00673442		13.4671	42.365	0.740929	0.324413	0.470273	0.353119
13.3928	42.2367	0.552819	0.0252613	0.703881	0.753127		13.467	42.365	0.333606	0.165572	0.500488	0.213256
13.3946	42.237	0.265083	0.224688	0.806872	0.0815173		13.4644	42.3655	0.136662	0.5	0.0581447	0.149239
13.3948	42.237	0.910176	0.33065	0.00116169	0.716675		13.4638	42.3655	0.00037592	0.5	0.496764	0.00128051
13.397	42.2374	0.0243247	0.5	0.164777	0.0374648		13.4534	42.3672	6.22449e-05	0.5	0.414397	0.000137286
13.4632	42.2477	0.782004	0.299441	0.042677	0.680857		13.3443	42.3848	0.926106	0.332105	0.0740953	0.937012
13.5072	42.2546	0.569959	0.434953	0.0160131	1		13.467	42.365	0.752403	0.0225899	0.602826	0.38469
13.3947	42.2371	0.916914	0.102799	0.0381109	0.808829		13.4643	42.3654	0.00100936	0.5	0.0374851	0.000586819
13.3948	42.2371	0.873905	0.237656	0.00806349	0.561476		13.4637	42.3655	7.83073e-06	0.5	0.178846	3.78183e-06
13.397	42.2374	0.0114652	0.5	0.029318	0.00897711		13.4578	42.3665	0.000137027	0.5	0.364962	0.000116908
13.4128	42.2399	0.68193	0.0204555	0.921488	0.529325		13.4574	42.3666	8.36413e-05	0.0220629	0.127103	0.000107823
13.4625	42.2476	0.406071	0.430407	0.101572	0.345397		13.4534	42.3672	0.0161732	0.5	0.770133	0.00534173
13.4625	42.2476	0.266915	0.5	0.671658	0.482917		13.3568	42.3828	0.286078	0.26669	0.978344	0.213256
13.463	42.2477	0.978516	0.0464217	0.00323488	0.961407		13.3443	42.3848	0.58871	0.5	0.0407201	0.649541
13.5072	42.2546	0.306645	0.00214019	0.0566013	0.208365		13.3421	42.3851	0.0424358	0.296266	0.00505402	0.118579
13.3934	42.2369	0.0130668	0.306022	0.0519256	0.00464509		13.3413	42.3853	0.979207	0.465217	0.191539	0.607483
13.3947	42.2371	0.405457	0.100503	0.178711	0.345397		13.4681	42.3648	0.00764926	0.381605	0.696154	0.00192365
13.3971	42.2375	0.0238839	0.5	0.637721	0.0312996		13.4671	42.3649	0.136228	0.349581	0.297679	0.123315
13.4114	42.2397	0.111928	0.041684	0.080724	0.183302		13.4643	42.3654	0.00012918	0.282209	0.237912	2.8095e-05
13.4128	42.2399	0.579616	0.258702	0.237462	0.771568		13.4637	42.3655	0.00161808	0.448642	0.0886865	0.00111481
13.4436	42.2447	0.892452	0.0986978	0.0462648	0.922905		13.4578	42.3664	0.0311055	0.317837	0.204409	0.0197392
13.4625	42.2477	0.146366	0.409997	0.483414	0.199748		13.4574	42.3665	0.000376111	0.309415	0.0543395	5.11987e-05
13.463	42.2477	0.647673	0.5	0.149191	0.438813		13.4533	42.3672	5.46518e-07	0.295492	0.034047	1.58006e-06
13.3932	42.2369	0.125157	0.242034	0.328421	0.167881		13.3568	42.3827	0.0474204	0.375336	0.754536	0.0269163
13.3933	42.2369	0.0363096	0.163667	0.471903	0.0276914		13.3457	42.3845	0.000549848	0.391125	0.949459	0.000348985
13.3971	42.2375	0.0777282	0.0665744	0.61971	0.0472684		13.3443	42.3848	0.91875	0.372607	0.00993265	0.968481
13.4113	42.2397	0.0588204	0.0250491	0.218578	0.0559653		13.3421	42.3851	1.97298e-05	0.175543	0.156687	0.000137286
13.4476	42.2454	0.347075	0.0122366	0.000432385	0.208365		13.4687	42.3646	0.0103474	0.5	0.693801	0.0168237
13.4631	42.2478	0.571614	0.377074	0.141666	0.942139		13.4681	42.3647	0.0579033	0.5	0.848199	0.0345197
13.5087	42.2549	0.512983	0.001	5.99086e-05	1		13.4677	42.3648	0.211397	0.151512	0.454457	0.260114
13.3924	42.2368	0.724765	0.5	0.192477	0.771568		13.4664	42.365	0.0225232	0.492999	0.505815	0.0528507
13.3971	42.2375	0.773507	0.0147616	0.343072	0.453251		13.4649	42.3653	0.750283	0.5	0.186804	0.41793
13.4375	42.2438	0.325358	0.5	0.591996	0.345397		13.4639	42.3654	0.606459	0.00472511	0.0369451	0.395586
13.4393	42.2441	0.307223	0.5	0.0251941	0.467954		13.4639	42.3654	0.388305	0.114595	0.235456	0.395586
13.4393	42.2441	0.222605	0.10373	0.0229636	0.594544		13.4631	42.3655	5.10259e-05	0.336752	0.730473	5.56986e-05
13.4577	42.247	0.865658	0.5	0.137347	0.884583		13.4579	42.3664	0.0353752	0.0189004	0.279764	0.032867
13.4598	42.2473	0.726474	0.0597153	0.00363075	0.561476		13.4189	42.3727	8.74502e-10	0.5	0.02495	4.9583e-08
13.4598	42.2473	0.967969	0.0586142	0.0219106	0.453251		13.3459	42.3845	0.0162686	0.0139505	0.953303	0.0108159
13.4631	42.2478	0.179856	0.5	0.0515898	0.333169		13.3457	42.3845	3.00359e-05	0.5	0.471435	6.05715e-05
13.5087	42.2549	0.0195663	0.5	0.000605944	0.0244478		13.3448	42.3846	0.0769825	0.5	0.67396	0.113987
13.3748	42.2341	0.718354	0.339801	0.00654614	0.545283		13.3376	42.3858	0.21051	0.0850788	0.00119647	0.166678
13.3889	42.2363	0.0438044	0.5	0.527292	0.0659557		13.4782	42.3631	0.0207077	0.359894	0.800031	0.0243069
13.3907	42.2366	0.00338887	0.340461	0.380247	0.00292196		13.4664	42.365	0.0651848	0.0720502	0.23951	0.179128
13.391	42.2366	0.723902	0.5	0.82749	0.922905		13.4639	42.3654	0.555288	0.1331	0.70155	0.304261
13.3924	42.2368	0.87166	0.15232	0.0372431	0.698682		13.4631	42.3655	9.52383e-06	0.279466	0.68137	9.62368e-06
13.3968	42.2375	0.573392	0.183677	0.0381243	0.410743		13.4189	42.3727	9.49538e-10	0.0394034	0.331309	2.01333e-08
13.3985	42.2378	0.91951	0.0124318	0.351335	0.790138		13.3459	42.3844	3.8214e-06	0.5	0.0561592	5.56986e-05
13.4392	42.2442	0.0994248	0.153756	0.147605	0.0858411		13.344	42.3847	0.685645	0.5	0.751011	0.751923
13.4576	42.247	0.65951	0.288457	0.206244	0.698682		13.3407	42.3853	0.18669	0.214415	0.188754	0.133227
13.458	42.2471	0.349302	0.391529	0.00141071	0.029448		13.3379	42.3857	0.0402547	0.212242	2.43962e-05	0.032867
13.4598	42.2474	0.73642	0.00497894	0.0067783	0.309564		13.3376	42.3858	0.480002	0.5	0.00229632	0.406667
13.4598	42.2474	0.994855	0.215681	0.0147011	0.498136		13.4693	42.3645	0.00613876	0.0159179	0.794987	0.00534173
13.4632	42.2479	0.700369	0.224973	0.00233392	0.545283		13.4677	42.3647	3.66508e-05	0.0362175	0.072419	9.94072e-05
13.4635	42.2479	0.947167	0.0743864	0.000385792	0.265746		13.4631	42.3655	0.637266	0.5	0.619916	0.722127
13.4709	42.2491	0.00988249	0.0444352	0.838307	0.00778368		13.3407	42.3852	0.00382463	0.5	0.176939	0.00324292
13.471	42.2491	0.190152	0.5	0.993279	0.424642		13.34	42.3853	0.436433	0.0656252	0.0135276	0.663821
13.4882	42.2518	0.891683	0.5	0.00360583	0.753127		13.3378	42.3857	0.0108416	0.0189012	0.00172104	0.0481942
13.3748	42.2341	0.643521	0.114082	0.000787521	0.0903485		13.4693	42.3644	0.552911	0.0133473	0.268478	0.304261
13.391	42.2367	0.325104	0.121688	0.132548	0.545283		13.4677	42.3647	0.0270768	0.0643444	0.0220736	0.0691253
13.3963	42.2375	0.310736	0.0934645	0.554864	0.24552		13.4671	42.3648	0.396287	0.0213026	0.516163	0.185607
13.4111	42.2398	0.774631	0.0263916	0.277425	0.865516		13.4631	42.3654	0.548391	0.5	0.407985	0.890007
13.4571	42.247	0.183941	0.5	0.302866	0.105022		13.4574	42.3664	0.000198472	0.5	0.951298	0.00078336
13.4709	42.2491	0.149747	0.5	0.722597	0.153456		13.346	42.3843	8.94014e-05	0.0522793	0.317101	6.58461e-05
13.5086	42.255	0.212996	0.5	0.1426	0.397117		13.3424	42.3849	0.595668	0.5	0.197144	0.34297
13.3962	42.2375	0.65717	0.0734615	0.0567462	0.333169		13.3407	42.3852	0.014057	0.0943495	0.316822	0.0121047
13.3963	42.2375	0.808641	0.352693	0.0822809	0.716675		13.34	42.3853	0.343339	0.5	0.0568004	0.179128
13.3968	42.2376	0.153268	0.5	0.600953	0.160546		13.3391	42.3854	0.118356	0.5	0.26616	0.118579
13.4111	42.2399	0.106478	0.5	0.25407	0.0397374		13.467	42.3648	0.138315	0.5	0.966948	0.213256
13.4125	42.2401	0.667361	0.0629963	0.874761	0.611405		13.4654	42.365	0.235242	0.5	0.563005	0.199081
13.4382	42.2441	0.187316	0.0760706	0.00765786	0.0773718		13.4598	42.3659	0.618425	0.131179	0.746352	0.41793
13.442	42.2447	0.984424	0.181924	0.994165	0.922905		13.4575	42.3663	0.000106179	0.5	0.138722	0.000160976
13.4426	42.2447	0.0246717	0.0181352	0.0238245	0.0166122		13.4574	42.3663	0.01623	0.5	0.949114	0.0168237
13.4571	42.247	0.168594	0.0930966	0.554068	0.139993		13.3459	42.3843	0.000116609	0.378339	0.384417	0.00179914
13.4948	42.2529	0.597409	0.5	0.186579	0.183302		13.3454	42.3844	1.89443e-08	0.222821	0.34071	3.10535e-07
13.5085	42.255	0.0964859	0.105691	0.359621	0.0815173		13.3438	42.3846	0.00179346	0.5	0.900698	0.00502502
13.5086	42.255	0.000871756	0.496149	0.050593	0.0118645		13.3424	42.3849	0.00979948	0.5	0.0433075	0.00721214
13.3886	42.2364	0.0040953	0.5	0.645125	0.00963304		13.34	42.3853	0.00846419	0.5	0.444416	0.00472537
13.3903	42.2366	0.0546989	0.5	0.285085	0.183302		13.4654	42.365	0.0445838	0.417364	0.222669	0.220611
13.3961	42.2375	0.0661902	0.00353714	0.767977	0.0145428		13.4598	42.3659	0.892037	0.5	0.390752	0.843385
13.4425	42.2448	0.0306843	0.00113276	0.034209	0.0244478		13.4575	42.3663	0.0174389	0.5	0.427176	0.0243069
13.4589	42.2473	0.531868	0.00764359	3.18962e-05	0.716675		13.3459	42.3843	1.41897e-10	0.5	0.0431379	6.90869e-08
13.5085	42.2551	0.390183	0.0179844	0.0576384	0.191395		13.3454	42.3844	1.20618e-07	0.5	0.0702811	3.43749e-06
13.3903	42.2367	0.00325933	0.5	0.093481	0.00673442		13.3431	42.3847	0.000420714	0.5	0.120838	0.000631114
13.3928	42.2371	0.552478	0.0897696	0.0136413	0.628475		13.3425	42.3848	0.0400441	0.0394588	0.0626743	0.0121047
13.3962	42.2376	0.0122873	0.0068754	0.500331	0.00212199		13.3409	42.3851	0.991349	0.127363	0.111033	0.707382
13.4376	42.2441	0.340553	0.139462	0.228578	0.265746		13.338	42.3856	0.403665	0.5	8.20206e-06	0.15489
13.4589	42.2474	0.639601	0.153216	0.00745879	0.790138		13.3375	42.3856	0.345014	0.5	0.0113277	0.429375
13.4708	42.2492	0.128878	0.207079	0.139515	0.235822		13.4598	42.3659	0.00225639	0.5	0.203534	0.00146869
13.5085	42.2551	0.127095	0.039512	0.590548	0.0999338		13.3565	42.3825	0.0106431	0.5	0.617343	0.0187217
13.509	42.2552	1.24387e-05	0.5	0.436912	0.000132046		13.3431	42.3847	0.0104707	0.454887	0.350078	0.00534173
13.3936	42.2372	0.24344	0.406673	0.359542	0.467954		13.3424	42.3848	0.151323	0.5	0.0994707	0.260114
13.3967	42.2377	0.284332	0.0425697	0.0929695	0.276278		13.3409	42.385	0.404177	0.458447	0.0589447	0.635388
13.4591	42.2474	0.22283	0.188018	0.115446	0.255494		13.3409	42.385	0.294032	0.376496	0.089098	0.353119
13.4631	42.2481	0.0604159	0.5	0.0132732	0.0397374		13.3379	42.3855	0.857582	0.318718	0.000323452	0.782094
13.4914	42.2525	0.442955	0.220801	0.343376	0.663209		13.4647	42.365	0.103811	0.134891	0.2577	0.101049
13.5085	42.2551	0.708662	0.0165463	0.934419	0.628475		13.343	42.3847	9.07548e-05	0.5	0.302237	3.34122e-05
13.3967	42.2377	0.555446	0.0187363	0.0104557	0.424642		13.3424	42.3848	0.00621005	0.5	0.27224	0.0127987
13.4111	42.24	0.646918	0.133483	0.056825	0.370697		13.3413	42.3849	0.151991	0.369733	0.272211	0.0856477
13.463	42.2481	0.00329597	0.5	0.000134698	0.00249277		13.3412	42.385	0.791942	0.5	0.771118	0.984238
13.4909	42.2524	0.916587	0.407778	0.00340701	0.790138		13.3404	42.3851	0.65213	0.460718	0.00430913	0.33301
13.3934	42.2373	0.607886	0.335034	0.82003	0.438813		13.338	42.3855	0.900218	0.5	0.481388	0.812596
13.4584	42.2474	0.280426	0.492954	0.973787	0.208365		13.4649	42.365	0.0177593	0.5	0.132171	0.00811197
13.463	42.2481	0.116515	0.124598	0.130947	0.0950444		13.4646	42.365	0.00958448	0.164408	0.0199877	0.00534173
13.3943	42.2374	0.0306493	0.347312	0.213795	0.0312996		13.4255	42.3713	7.06722e-08	0.332354	0.0826144	4.24412e-07
13.4106	42.24	0.203982	0.00278374	0.0139188	0.110313		13.343	42.3846	0.0333163	0.334985	0.314492	0.0632951
13.4584	42.2474	0.577791	0.5	0.66696	0.698682		13.3424	42.3847	0.011677	0.346833	0.548472	0.00679673
13.5096	42.2554	0.000331176	0.00849106	0.00797476	0.000194668		13.3412	42.3849	0.233311	0.5	0.240484	0.304261
13.3871	42.2363	0.858592	0.239642	0.992876	0.357906		13.3404	42.3851	0.476968	0.221993	0.0994511	0.476939
13.4115	42.2402	0.187543	0.5	0.73611	0.0950444		13.3379	42.3854	2.7246e-09	0.5	0.768022	5.78081e-07
13.4423	42.245	0.5987	0.129008	0.0535412	0.903716		13.4648	42.3649	0.000241799	0.5	0.486017	0.000160976
13.5096	42.2554	0.019586	0.0796363	0.25603	0.00836137		13.4644	42.365	0.207432	0.225859	0.60151	0.17282
13.3871	42.2364	0.3167	0.5	0.446692	0.255494		13.4255	42.3713	1.86698e-10	0.5	0.125206	1.42697e-08
13.3881	42.2365	0.101501	0.5	0.00736997	0.133611		13.3444	42.3844	0.00761599	0.115484	0.0988125	0.00472537
13.3895	42.2368	0.850582	0.5	0.710924	0.790138		13.4644	42.365	0.288516	0.16831	0.975052	0.060536
13.3927	42.2373	0.637807	0.35734	3.9026e-05	0.139993		13.4639	42.365	5.08881e-07	0.0876653	0.978202	4.57229e-06
13.4109	42.2401	0.46456	0.386285	0.462312	0.383768		13.4592	42.3658	1.40617e-05	0.151711	0.723383	6.05715e-05
13.4115	42.2402	0.933041	0.00457399	0.733031	0.410743		13.4538	42.3667	0.0016501	0.5	0.882039	0.000841254
13.4115	42.2402	0.707818	0.0408176	0.565966	0.453251		13.4255	42.3713	1.25547e-09	0.161075	0.17364	6.30664e-09
13.4568	42.2473	0.838114	0.303405	0.00496122	0.865516		13.3444	42.3843	0.000780167	0.14065	0.119733	0.000470691
13.5096	42.2555	0.00607785	0.5	0.678177	0.00625903		13.3429	42.3846	0.0467938	0.436736	0.00020653	0.0399101
13.5086	42.2554	0.00167646	0.213727	0.031728	0.00230054		13.4688	42.3642	0.0170549	0.5	0.605725	0.0114442
13.5097	42.2555	0.0124668	0.5	0.315485	0.0110744		13.4639	42.365	1.14371e-08	0.5	0.783647	1.43134e-06
13.3909	42.2371	0.322376	0.283258	0.959428	0.467954		13.4537	42.3667	0.0343364	0.241535	0.96658	0.00250491
13.3921	42.2372	0.938138	0.16482	0.93788	0.680857		13.3444	42.3843	0.000308041	0.5	0.743219	0.000257226
13.4135	42.2406	0.581852	0.260107	0.00767879	0.498136		13.3429	42.3845	0.0194868	0.0820897	0.0718339	0.00811197
13.456	42.2472	0.768337	0.0994853	0.166498	0.771568		13.4687	42.3642	0.00125266	0.455222	0.336828	0.00250491
13.4602	42.2479	0.366408	0.0325359	0.00152887	0.160546		13.4639	42.365	1.42573e-06	0.281916	0.163003	5.56986e-05
13.4633	42.2484	0.00141622	0.259145	0.0102928	0.000771198		13.43	42.3705	1.37736e-10	0.482913	0.155045	3.16915e-08
13.4638	42.2484	0.198345	0.499551	0.0371319	0.309564		13.3444	42.3843	0.000151996	0.426271	0.282787	0.000631114
13.4911	42.2527	0.876051	0.11235	0.0128288	0.716675		13.43	42.3704	1.35596e-08	0.5	0.239329	5.78081e-07
13.4912	42.2527	0.541021	0.035159	0.0671823	0.226399		13.3445	42.3842	0.00205479	0.5	0.0313766	0.00304184
13.5102	42.2557	0.611137	0.5	0.0328201	0.438813		13.3428	42.3845	0.00200898	0.5	0.0639059	0.00324292
13.3909	42.2371	0.696899	0.5	0.65709	0.808829		13.4592	42.3657	0.00150766	0.5	0.53035	0.00304184
13.4142	42.2407	0.699259	0.5	0.051075	0.846528		13.4591	42.3657	0.000544639	0.5	0.544795	0.00137163
13.4433	42.2453	0.750596	0.0119836	0.0102927	0.771568		13.3444	42.3842	0.00090744	0.5	0.00143014	0.000586819
13.4525	42.2467	0.386299	0.0225658	0.0776436	0.529325		13.3428	42.3844	0.0129733	0.5	0.0324132	0.0219197
13.456	42.2472	0.233671	0.5	0.158075	0.287091		13.4595	42.3656	0.00206243	0.0344606	0.786765	0.000729183
13.4602	42.2479	0.451336	0.0668881	0.0105848	0.680857		13.4591	42.3656	0.000689697	0.140557	0.903965	0.000631114
13.4633	42.2484	0.033786	0.5	0.470864	0.0229532		13.4546	42.3664	0.00136584	0.5	0.138377	0.00234619
13.4911	42.2527	0.774879	0.0963949	0.0103895	1		13.3444	42.3841	0.00302652	0.5	0.0303516	0.00168207
13.4973	42.2537	0.026114	0.0333864	4.36261e-05	0.00500869		13.4595	42.3655	0.00266832	0.247146	0.613331	0.00285219
13.5102	42.2557	0.790648	0.5	0.0222569	0.453251		13.4546	42.3663	6.04218e-07	0.332624	0.0283081	2.83681e-06
13.3869	42.2365	0.133646	0.5	0.182262	0.160546		13.4301	42.3703	2.58013e-07	0.0010177	0.827168	2.03661e-07
13.3925	42.2374	0.21014	0.5	0.553834	0.199748		13.3448	42.384	0.0149015	0.5	0.764033	0.0230865
13.3926	42.2374	0.98836	0.263033	0.28339	0.663209		13.4657	42.3645	0.267764	0.5	0.171568	0.580138
13.3957	42.2379	0.316168	0.5	0.778006	0.199748		13.459	42.3656	0.0149957	0.5	0.395749	0.0230865
13.4127	42.2405	0.0746268	0.0216454	0.96675	0.0374648		13.4546	42.3663	0.000420401	0.5	0.200374	0.000323537
13.4142	42.2408	0.6883	0.5	0.191811	0.884583		13.43	42.3703	6.54635e-11	0.5	0.180547	1.79575e-08
13.4523	42.2467	0.702409	0.00655179	0.0928352	0.467954		13.3447	42.384	0.155833	0.5	0.162899	0.33301
13.4524	42.2467	0.499636	0.0348178	0.0496439	0.545283		13.4687	42.364	0.647738	0.5	0.946643	1
13.4624	42.2483	0.114687	0.118194	0.00401527	0.276278		13.4656	42.3645	2.22822e-05	0.313239	0.509658	3.34122e-05
13.4911	42.2528	0.729904	0.0199004	0.00153089	0.482917		13.4599	42.3654	6.92919e-05	0.32338	0.909491	0.000203827
13.4973	42.2537	0.0016428	0.5	0.000104607	0.00100063		13.4571	42.3658	2.21542e-05	0.5	0.219452	9.16142e-05
13.3869	42.2365	0.865522	0.5	0.965074	0.716675		13.4546	42.3663	2.89641e-07	0.5	0.766944	2.12074e-06
13.3957	42.2379	0.972945	0.5	0.967889	0.903716		13.4389	42.3688	4.77894e-08	0.5	0.45826	3.44747e-07
13.3967	42.2381	0.142871	0.00115246	1.54929e-05	0.438813		13.43	42.3702	7.97685e-13	0.0028392	0.387917	4.86794e-10
13.4119	42.2405	0.451124	0.116564	0.222036	0.175465		13.4081	42.3738	2.66769e-07	0.378701	0.612994	3.78183e-06
13.4123	42.2405	0.581248	0.312153	0.00124127	0.942139		13.4687	42.3639	0.258545	0.5	0.511937	0.286039
13.4127	42.2406	0.00135325	0.001	0.354883	0.000591436		13.467	42.3642	0.00731439	0.5	0.500317	0.00811197
13.4624	42.2483	0.0808405	0.5	0.598156	0.105022		13.4657	42.3644	8.035e-08	0.5	0.500182	8.78032e-06
13.4973	42.2538	0.713803	0.5	1.91977e-05	0.321225		13.4644	42.3646	0.00409477	0.219561	0.283553	0.00721214
13.4973	42.2538	2.82437e-07	0.0100039	0.0181397	3.31004e-07		13.4591	42.3655	0.00104442	0.0183	0.974132	0.00078336
13.3967	42.2381	0.0217024	0.00154813	0.184657	0.0202007		13.4577	42.3657	0.00165263	0.001	0.7903	5.56986e-05
13.4123	42.2406	0.560021	0.00960062	0.796488	0.139993		13.4571	42.3658	2.34119e-07	0.5	0.0226114	1.9233e-06
13.4572	42.2476	0.422137	0.4163	0.305894	0.309564		13.4547	42.3662	0.00450414	0.261521	0.788084	0.00205603
13.5068	42.2553	0.820258	0.5	0.0430857	0.846528		13.4539	42.3663	0.467725	0.383763	0.349083	0.37398
13.51	42.2558	0.548441	0.0330972	0.252115	0.663209		13.4388	42.3688	6.70049e-08	0.5	0.0903943	2.33757e-06
13.4121	42.2406	0.898073	0.00325865	0.0995026	0.410743		13.43	42.3702	5.27717e-06	0.0250613	0.429139	1.58006e-06
13.4123	42.2406	0.495153	0.0892545	0.75011	0.167881		13.4293	42.3703	1.32909e-08	0.5	0.572917	6.90869e-08
13.4124	42.2406	0.84678	0.337175	0.961095	0.808829		13.3405	42.3846	0.763241	0.5	0.00799039	0.736976
13.4545	42.2472	0.453756	0.5	0.00712998	0.191395		13.4689	42.3639	0.547848	0.0135254	0.133086	0.707382
13.4593	42.2479	0.981964	0.0179634	0.116855	0.771568		13.467	42.3642	0.000182839	0.145501	0.530468	0.000137286
13.5102	42.2558	0.0906235	0.379841	0.0390623	0.115813		13.4667	42.3642	0.47433	0.5	0.0878769	0.635388
13.5103	42.2559	0.0144344	0.00309371	0.141962	0.0145428		13.4657	42.3644	0.000257961	0.5	0.925111	0.00146869
13.4121	42.2406	0.274395	0.5	0.146691	0.611405		13.4643	42.3646	0.0154085	0.147606	0.0519026	0.0345197
13.4124	42.2407	0.687509	0.116389	0.826809	0.424642		13.46	42.3653	0.147863	0.406146	0.447818	0.149239
13.4545	42.2472	0.542305	0.419368	0.00561329	0.183302		13.4591	42.3655	0.000754445	0.5	0.200006	0.00137163
13.4573	42.2476	0.9225	0.0339434	0.116351	0.410743		13.4577	42.3657	1.05542e-05	0.0807878	0.323235	1.26432e-05
13.4593	42.2479	0.372768	0.0979225	0.568787	0.167881		13.4547	42.3662	9.58171e-05	0.5	0.879064	6.58461e-05
13.461	42.2482	0.531574	0.5	0.221929	0.24552		13.4538	42.3663	0.000402617	0.5	0.237464	0.000729183
13.5102	42.2559	0.0660756	0.0484993	0.170021	0.0421259		13.4293	42.3703	6.93574e-11	0.236679	0.43747	2.73582e-09
13.3883	42.2369	0.484931	0.317371	0.998803	0.577899		13.4277	42.3705	0.000124107	0.5	0.195425	0.000323537
13.396	42.2381	0.961517	0.420046	0.218311	0.865516		13.4248	42.371	5.16394e-05	0.483488	0.0765108	8.78032e-06
13.4121	42.2406	0.00866038	0.0680661	0.275278	0.0103314		13.4122	42.373	0.213889	0.328237	0.624424	0.0504775
13.4609	42.2482	0.961504	0.5	0.00526818	0.594544		13.3405	42.3846	0.713998	0.0286648	0.00734811	0.858873
13.465	42.2489	0.190707	0.375804	0.000969579	0.133611		13.4689	42.3638	0.0971266	0.0400334	0.462999	0.036243
13.4954	42.2536	0.0181322	0.240644	0.00447243	0.0118645		13.468	42.364	0.916276	0.5	0.279535	0.663821
13.4965	42.2538	0.270922	0.220059	0.0308077	0.121526		13.4667	42.3642	0.246742	0.5	0.235179	0.464785
13.3878	42.2369	0.707569	0.298457	0.356009	0.397117		13.4601	42.3653	0.376591	0.129999	0.92614	0.304261
13.3884	42.237	0.814667	0.5	0.172161	1		13.4591	42.3654	3.00795e-05	0.0855949	0.933499	1.51375e-05
13.4431	42.2455	0.669885	0.102194	0.948799	0.321225		13.4577	42.3656	3.52005e-05	0.251828	0.237118	4.32119e-05
13.4539	42.2472	0.961293	0.00212122	0.446	0.698682		13.4538	42.3663	0.00304046	0.153332	0.763905	0.00137163
13.462	42.2484	0.100713	0.13693	0.734749	0.0421259		13.4293	42.3702	7.73231e-10	0.0776691	0.107916	1.00792e-08
13.4624	42.2485	0.587563	0.5	0.285745	0.577899		13.4292	42.3702	1.84528e-07	0.35454	0.911832	1.17324e-06
13.4852	42.2521	0.298984	0.0289108	0.178435	0.561476		13.4276	42.3705	0.484303	0.16232	0.00779913	0.937012
13.49	42.2528	0.811484	0.5	0.392562	0.846528		13.4248	42.371	6.50118e-12	0.493774	0.386554	2.25642e-08
13.4965	42.2538	0.909279	0.214448	0.178686	0.577899		13.424	42.3711	6.31035e-10	0.5	0.0801747	2.01333e-08
13.3883	42.237	0.447455	0.5	0.0835188	0.424642		13.4122	42.373	9.06646e-07	0.5	0.126101	1.74358e-06
13.3913	42.2374	0.132737	0.186841	0.0273961	0.133611		13.3408	42.3845	0.388509	0.5	0.0529368	0.260114
13.4539	42.2472	0.671338	0.0146827	0.0431128	0.397117		13.3404	42.3846	0.139498	0.181702	0.654741	0.476939
13.4621	42.2485	0.673668	0.425028	0.288954	0.645745		13.4705	42.3635	0.288089	0.001	0.0753852	0.0150967
13.4624	42.2485	0.959455	0.5	0.169993	1		13.468	42.3639	0.603897	0.5	0.0564988	0.489265
13.4852	42.2521	0.643679	0.375789	0.000873616	0.333169		13.4655	42.3643	0.00194668	0.5	0.820793	0.00472537
13.4965	42.2539	0.711514	0.5	0.118901	0.298186		13.4602	42.3652	0.0115757	0.5	0.690882	0.0127987
13.5094	42.2559	0.235681	0.304096	0.110705	0.298186		13.4591	42.3654	0.00171548	0.475656	0.88506	0.00324292
13.3913	42.2375	0.491864	0.268602	0.268584	0.438813		13.4545	42.3661	0.00538095	0.289335	0.931882	0.00128051
13.4131	42.2409	0.135156	0.240847	0.0416806	0.0733997		13.4363	42.3691	1.10778e-08	0.5	0.985385	1.32763e-07
13.4525	42.247	0.244812	0.5	0.866217	0.321225		13.4293	42.3702	4.59603e-09	0.001	0.217967	1.42697e-08
13.4956	42.2538	0.628704	0.200147	0.281631	0.453251		13.4276	42.3705	8.86089e-10	0.5	0.423972	3.96705e-08
13.4957	42.2538	0.054727	0.429952	0.00460526	0.0999338		13.4705	42.3635	0.185849	0.5	0.7059	0.243762
13.5095	42.2559	0.321633	0.479853	0.00145619	0.298186		13.4679	42.3639	0.117058	0.5	0.971171	0.118579
13.4956	42.2538	0.8626	0.294561	0.468365	0.884583		13.4654	42.3643	5.87265e-06	0.122311	0.761416	0.000257226
13.4956	42.2538	0.650234	0.0292712	0.000233442	1		13.4643	42.3645	0.86291	0.5	0.0501019	0.937012
13.4963	42.2539	0.735749	0.5	0.109858	0.680857		13.4602	42.3652	0.0351288	0.344143	0.584257	0.0632951
13.5095	42.2559	0.105926	0.5	0.00804618	0.153456		13.4592	42.3653	0.0721035	0.5	0.532111	0.0345197
13.4133	42.241	0.0464014	0.001	0.939501	0.0103314		13.4571	42.3657	7.10963e-07	0.5	0.527211	6.65336e-06
13.4489	42.2465	0.86515	0.0201826	0.0096124	0.980698		13.4545	42.3661	0.000789368	0.4682	0.592787	0.000323537
13.4509	42.2469	0.45101	0.0573349	0.0398687	0.561476		13.4293	42.3702	2.17874e-09	0.19435	0.209279	8.60229e-08
13.4833	42.2519	0.0972169	0.321216	0.00352212	0.0500316		13.4276	42.3704	1.7165e-09	0.216307	0.999107	1.2713e-08
13.4956	42.2538	0.929942	0.150547	0.0511393	0.467954		13.4271	42.3705	2.21113e-09	0.0280504	0.756556	2.83096e-08
13.4956	42.2538	0.251433	0.5	0.432435	0.235822		13.4249	42.3709	4.43037e-12	0.350019	0.255317	8.96947e-09
13.496	42.2539	0.439191	0.230969	0.108643	0.226399		13.4123	42.3729	4.92737e-07	0.282162	0.959981	1.43134e-06
13.4963	42.2539	0.326521	0.0820094	0.00601013	0.133611		13.4655	42.3643	0.0118091	0.32052	0.240523	0.0142932
13.5061	42.2555	0.0983635	0.5	0.049335	0.160546		13.4642	42.3645	0.845377	0.0700259	0.218606	0.635388
13.5096	42.256	0.0497888	0.310281	0.00656419	0.0858411		13.4592	42.3653	0.0299024	0.0550169	0.981551	0.00205603
13.3896	42.2373	0.606568	0.0876308	0.00822728	0.208365		13.4571	42.3656	3.62548e-09	0.5	0.258073	4.43591e-08
13.396	42.2383	0.858685	0.5	0.353759	0.980698		13.4298	42.37	3.11365e-10	0.427217	0.578352	1.79575e-08
13.3971	42.2385	0.0517809	0.0317938	0.381222	0.0312996		13.4298	42.37	1.12611e-12	0.14045	0.352251	6.25804e-10
13.4084	42.2403	0.530957	0.120571	0.400326	0.884583		13.4297	42.3701	0.00162432	0.381367	0.5118	0.000586819
13.4509	42.2469	0.194102	0.13569	0.749834	0.438813		13.4287	42.3702	0.00112259	0.0292197	0.0227991	4.32119e-05
13.4589	42.2482	0.69737	0.0855361	0.264203	0.577899		13.4276	42.3704	2.07436e-11	0.222841	0.0663159	1.68339e-09
13.4833	42.252	0.0590357	0.0180195	0.0944393	0.029448		13.427	42.3705	1.03603e-09	0.0200077	0.0661822	4.41918e-09
13.4834	42.252	0.161503	0.291493	0.00202354	0.235822		13.4248	42.3708	1.56822e-09	0.257327	0.140387	1.32763e-07
13.4957	42.2539	0.416727	0.0177464	0.0162049	0.217247		13.4123	42.3729	6.48353e-06	0.5	0.414853	4.1591e-06
13.496	42.2539	0.134922	0.172526	0.00661626	0.0472684		13.3433	42.384	0.296815	0.215899	0.347568	0.27721
13.4962	42.254	0.271734	0.5	0.0491973	0.287091		13.3373	42.385	0.000753073	0.349261	0.000717807	0.0114442
13.3967	42.2385	0.537879	0.257745	0.0239393	0.397117		13.4658	42.3642	0.000481497	0.5	0.895936	0.00119501
13.3971	42.2385	0.411758	0.0632101	0.81507	0.298186		13.4579	42.3655	0.00013565	0.5	0.347825	0.000126711
13.4116	42.2408	0.0641385	0.141684	0.520741	0.0397374		13.4571	42.3656	5.56163e-10	0.5	0.285574	3.5464e-08
13.4431	42.2457	0.31241	0.089049	0.00669733	0.052929		13.4545	42.366	1.65344e-05	0.370304	0.836995	6.05715e-05
13.4588	42.2482	0.452382	0.0784775	0.578174	0.594544		13.4524	42.3664	1.25621e-06	0.0209248	0.0759935	7.30063e-06
13.496	42.254	0.281162	0.427093	0.991841	0.0591452		13.4298	42.37	9.07721e-06	0.376342	0.263026	9.62368e-06
13.3897	42.2374	0.975859	0.0570852	0.724936	0.611405		13.4297	42.37	9.58282e-13	0.160964	0.0702976	4.86794e-10
13.4116	42.2409	0.259874	0.226414	0.0153961	0.226399		13.4287	42.3702	1.79914e-07	0.00981705	0.000378073	3.47973e-09
13.4139	42.2412	0.932499	0.0565051	0.000207762	0.199748		13.4276	42.3704	3.2947e-09	0.5	0.129287	3.5464e-08
13.415	42.2414	0.172809	0.180723	0.108825	0.160546		13.3603	42.3812	0.164098	0.119363	0.514939	0.109537
13.4564	42.2478	0.284693	0.0112159	0.0219894	0.153456		13.3433	42.3839	0.160551	0.396143	0.0144222	0.260114
13.4587	42.2482	0.555942	0.5	0.134921	0.753127		13.4658	42.3641	0.014094	0.5	0.129423	0.0243069
13.4618	42.2487	0.825265	0.5	0.153405	0.942139		13.4643	42.3644	0.031057	0.5	0.519572	0.0168237
13.4621	42.2487	0.439002	0.139545	8.63125e-05	0.903716		13.4579	42.3654	5.87167e-05	0.5	0.273084	0.000299834
13.4653	42.2492	0.21997	0.5	0.00619576	0.276278		13.4545	42.366	4.98696e-07	0.5	0.923816	6.40317e-07
13.5067	42.2557	0.534971	0.108072	0.649522	0.370697		13.4524	42.3663	9.93039e-08	0.335167	0.132451	1.74358e-06
13.5098	42.2562	0.170079	0.5	0.726066	0.235822		13.4286	42.3702	1.72941e-05	0.0126089	0.000197181	1.64559e-07
13.3863	42.2369	0.0292983	0.112122	0.588922	0.0215387		13.3374	42.3849	7.73405e-05	0.5	0.0484121	0.000903096
13.3897	42.2375	0.165661	0.5	0.716071	0.217247		13.4831	42.3613	0.424384	0.5	0.79943	0.353119
13.3901	42.2375	0.44272	0.5	0.436512	0.333169		13.4656	42.3641	0.167143	0.5	0.491325	0.166678
13.4139	42.2413	0.365192	0.0813211	0.594261	0.663209		13.4643	42.3644	0.462904	0.5	0.851174	0.501761
13.415	42.2414	0.121124	0.0238483	0.433847	0.0229532		13.4597	42.3651	0.00388788	0.261821	0.590268	0.0026734
13.4652	42.2492	0.846796	0.5	0.35137	0.942139		13.458	42.3654	3.4491e-06	0.315838	0.18533	1.38368e-05
13.5068	42.2557	0.266777	0.5	0.529303	0.208365		13.4296	42.37	3.88533e-10	0.424884	0.114539	4.43591e-08
13.5098	42.2562	0.0390016	0.214464	0.914882	0.0591452		13.3374	42.3848	0.107011	0.5	0.00348442	0.678225
13.3863	42.237	0.230473	0.5	0.641853	0.183302		13.4678	42.3637	0.571894	0.001	0.759017	0.243762
13.3895	42.2375	0.445423	0.278702	0.0202743	0.321225		13.4656	42.3641	0.174293	0.152081	0.94036	0.101049
13.39	42.2376	0.740272	0.37109	0.0498456	0.298186		13.459	42.3652	0.131635	0.5	0.868943	0.128197
13.3949	42.2383	0.178597	0.0120891	0.0166717	0.00836137		13.4585	42.3652	0.243108	0.220499	0.755792	0.0753896
13.4074	42.2403	0.208428	0.455644	0.00955665	0.0591452		13.458	42.3653	3.27878e-06	0.0708481	0.0153221	1.80968e-05
13.4148	42.2414	0.114113	0.154124	0.653702	0.0999338		13.4296	42.3699	7.74964e-13	0.143378	0.0374065	1.31747e-09
13.415	42.2415	0.331487	0.262704	0.0811266	0.052929		13.3514	42.3825	0.0276465	0.5	0.650092	0.0255828
13.4537	42.2475	0.901828	0.5	0.124782	0.942139		13.3374	42.3848	0.606651	0.450393	0.0579605	0.968481
13.4618	42.2487	0.324695	0.0807622	0.0577826	0.410743		13.4722	42.363	0.0108505	0.032812	0.357657	0.00502502
13.4621	42.2488	0.243684	0.00548451	0.00270239	0.438813		13.4678	42.3637	0.359648	0.03286	0.217163	0.323238
13.3895	42.2375	0.489937	0.217565	0.864097	0.139993		13.4655	42.3641	0.2842	0.223936	0.912028	0.395586
13.4151	42.2415	0.154648	0.491904	0.219985	0.0202007		13.4644	42.3643	0.400848	0.5	0.140558	0.527251
13.4433	42.2459	0.875351	0.232393	0.010881	0.961407		13.4296	42.3699	8.23973e-13	0.5	0.00669647	1.2713e-08
13.4456	42.2463	0.167358	0.5	0.0208523	0.105022		13.4158	42.3721	9.16874e-09	0.5	1.64505e-05	1.47836e-07
13.4618	42.2488	0.342162	0.264519	0.0260887	0.383768		13.3437	42.3837	0.0710352	0.5	0.923535	0.113987
13.4621	42.2488	0.0631858	0.5	0.0029072	0.287091		13.4829	42.3612	0.0291765	0.5	0.64677	0.0632951
13.3878	42.2373	0.00173952	0.5	0.000353183	0.000706294		13.4722	42.363	0.00571377	0.0633369	0.0962677	0.00811197
13.4423	42.2458	0.880688	0.0192705	0.000956302	0.110313		13.4682	42.3636	0.00236123	0.5	0.176158	0.000903096
13.4424	42.2458	0.0416881	0.5	0.0125165	0.0472684		13.468	42.3636	0.307115	0.5	0.770261	0.593739
13.3878	42.2373	0.0473326	0.5	0.430704	0.0397374		13.4655	42.364	0.0297909	0.00477751	0.326737	0.0255828
13.4157	42.2417	0.79121	0.415818	0.021948	0.611405		13.464	42.3643	0.00104345	0.5	0.192639	0.00368183
13.4423	42.2458	0.645425	0.11989	0.0675074	0.577899		13.4598	42.365	0.00504395	0.0689906	0.00490533	0.0135277
13.388	42.2374	0.298323	0.001	0.217025	0.0591452		13.4579	42.3653	9.34671e-08	0.5	0.133843	1.43134e-06
13.3894	42.2376	0.223099	0.5	0.301004	0.208365		13.4526	42.3661	2.52883e-07	0.5	0.299814	2.33757e-06
13.4423	42.2459	0.504064	0.0115375	0.86049	0.498136		13.4523	42.3662	9.36001e-07	0.292194	0.072017	2.57483e-05
13.4534	42.2476	0.654726	0.0108435	0.0286476	1		13.3437	42.3837	0.051661	0.5	0.220486	0.0691253
13.388	42.2374	0.1363	0.5	0.721827	0.0773718		13.3426	42.3839	0.800106	0.5	0.641214	0.452804
13.3894	42.2376	0.25101	0.5	0.886	0.482917		13.3305	42.3858	0.000318266	0.144893	0.0651063	0.00250491
13.5093	42.2563	0.47847	0.5	0.351488	0.370697		13.4829	42.3612	0.0234316	0.0533736	0.10095	0.038039
13.3879	42.2375	0.426021	0.00431344	0.899953	0.208365		13.4683	42.3636	0.0407055	0.125783	0.672833	0.004442
13.3891	42.2376	0.0849669	0.153509	0.997727	0.0591452		13.468	42.3636	0.138962	0.5	0.506296	0.41793
13.4203	42.2425	0.00667677	0.203213	0.741404	0.00897711		13.467	42.3638	0.235308	0.00281007	0.894739	0.0208045
13.4388	42.2454	0.572493	0.5	2.12841e-09	0.645745		13.4655	42.364	0.00232321	0.5	0.238469	0.00811197
13.5092	42.2564	0.463107	0.5	0.0473966	0.827629		13.4644	42.3642	0.720751	0.5	0.323472	0.766964
13.3879	42.2375	0.834007	0.0143481	0.24237	0.827629		13.4598	42.3649	0.0140064	0.5	0.0451835	0.0135277
13.3887	42.2376	0.206667	0.0319082	0.0645787	0.716675		13.4579	42.3652	3.9757e-06	0.5	0.000560749	2.8095e-05
13.3887	42.2376	0.390922	0.378241	0.0260945	0.410743		13.4526	42.3661	1.20633e-09	0.314708	0.0379458	1.19181e-07
13.3889	42.2376	0.148432	0.364641	0.94662	0.298186		13.4523	42.3661	0.000263471	0.5	0.320986	0.000545433
13.3891	42.2377	0.408168	0.255837	0.171362	0.383768		13.3432	42.3837	0.129831	0.418651	0.507048	0.243762
13.4388	42.2454	0.136955	0.5	0.0169081	0.133611		13.3426	42.3838	0.373523	0.230111	0.687974	0.34297
13.4487	42.247	0.69351	0.0196655	0.319495	0.438813		13.3305	42.3858	1.63686e-05	0.5	0.0306922	0.000188476
13.5085	42.2563	0.0680655	0.5	0.766925	0.105022		13.4684	42.3635	0.00104186	0.5	0.575937	0.000348985
13.3887	42.2376	0.333146	0.00503939	0.0128472	0.903716		13.4669	42.3637	0.486743	0.134388	0.617524	0.133227
13.3887	42.2376	0.162716	0.444043	0.316129	0.175465		13.4644	42.3641	0.485574	0.5	1.25467e-05	0.663821
13.4132	42.2415	0.417162	0.218958	0.0828672	0.628475		13.4525	42.3661	2.38572e-07	0.5	0.258629	1.9233e-06
13.4487	42.247	0.99668	0.001	0.759461	1		13.427	42.3702	2.74901e-07	0.156331	0.621843	1.19181e-07
13.4621	42.2491	0.142451	0.5	0.868594	0.127457		13.3455	42.3833	0.175099	0.5	0.167	0.304261
13.3881	42.2376	0.244172	0.5	0.0616522	0.255494		13.3453	42.3834	0.0480039	0.191706	0.0720266	0.0459983
13.4619	42.2491	0.256881	0.5	0.203753	0.276278		13.4711	42.363	0.00275258	0.5	0.453373	0.00103961
13.462	42.2491	0.226698	0.5	0.881371	0.255494		13.4683	42.3635	0.00797	0.370921	0.478785	0.0060298
13.5075	42.2562	0.00388977	0.0103548	0.263519	0.00091793		13.4611	42.3646	0.0456057	0.5	0.625632	0.0481942
13.3881	42.2376	0.00212414	0.405338	0.401959	0.00625903		13.4524	42.366	7.55325e-10	0.5	0.348393	7.71058e-08
13.4489	42.2471	0.903078	0.0397928	0.751182	0.846528		13.427	42.3702	8.38376e-08	0.5	0.257589	1.43134e-06
13.4501	42.2473	0.575371	0.183188	0.000425318	0.217247		13.3455	42.3833	0.523319	0.5	0.124929	0.827958
13.4619	42.2491	0.0160593	0.0157704	0.0511712	0.00180242		13.3453	42.3833	0.272115	0.00110942	0.0162206	0.0970055
13.462	42.2492	0.176371	0.00884738	0.0592871	0.0421259		13.3443	42.3835	6.21902e-05	0.5	0.0540107	3.06442e-05
13.4431	42.2462	0.844704	0.00661462	0.0150122	0.903716		13.4826	42.3611	0.893971	0.146291	0.0549524	0.968481
13.4571	42.2484	0.354031	0.5	0.370908	0.716675		13.4765	42.3621	0.0713383	0.00118577	0.368117	0.0121047
13.4676	42.2501	0.220973	0.5	0.00726822	0.884583		13.4711	42.363	0.00314091	0.383714	0.12339	0.00285219
13.4677	42.2501	0.66112	0.220157	0.224311	0.529325		13.4694	42.3633	0.132181	0.5	0.189529	0.0970055
13.4685	42.2502	0.563328	0.0615595	0.113712	0.734826		13.4632	42.3643	0.000157607	0.5	0.270234	0.000148687
13.3855	42.2373	0.0463051	0.0622031	0.876951	0.0312996		13.4611	42.3646	0.0175272	0.247976	0.621723	0.0219197
13.4662	42.2499	0.272661	0.5	3.14072e-06	0.121526		13.4524	42.366	2.94881e-10	0.190135	0.0374581	3.16915e-08
13.4672	42.25	0.29256	0.00322384	0.0098584	0.133611		13.3465	42.3831	0.593018	0.395363	0.008933	0.304261
13.4676	42.2501	0.791521	0.5	0.145226	1		13.3443	42.3835	0.000334531	0.0291073	0.196537	7.77265e-05
13.394	42.2387	0.253286	0.0326782	0.682345	0.529325		13.4825	42.3611	0.548437	0.5	0.232073	0.593739
13.4509	42.2475	0.961846	0.315602	0.0700472	0.942139		13.4765	42.3621	0.00197249	0.131309	0.146984	0.00304184
13.455	42.2482	0.956444	0.299542	0.0430876	0.734826		13.4712	42.3629	0.0111157	0.188447	0.967867	0.0197392
13.4661	42.2499	0.998867	0.457209	3.21312e-05	0.594544		13.4694	42.3632	0.0516783	0.0229057	0.615537	0.0312825
13.4673	42.2501	0.905354	0.152544	0.277216	0.716675		13.4664	42.3637	0.0503509	0.5	0.628522	0.0528507
13.5065	42.2562	0.150855	0.5	0.0101267	0.298186		13.4647	42.364	0.0930314	0.5	0.192704	0.0821098
13.388	42.2378	0.332284	0.0776101	0.597271	0.265746		13.4632	42.3642	2.70688e-05	0.42491	0.0181214	5.56986e-05
13.4508	42.2476	0.944114	0.0226346	0.193783	0.333169		13.4611	42.3646	0.786974	0.15154	0.661242	0.501761
13.4539	42.248	0.870568	0.278998	0.000164017	0.846528		13.4546	42.3656	1.41313e-07	0.5	0.0243302	3.78183e-06
13.455	42.2482	0.952382	0.327986	0.00163512	0.513607		13.4524	42.366	1.08049e-09	0.291182	0.0509985	7.71058e-08
13.4645	42.2497	0.580806	0.410233	0.000228224	1		13.3381	42.3844	0.657659	0.5	0.0288251	0.607483
13.4661	42.2499	0.780345	0.0646723	0.0152683	0.226399		13.4714	42.3629	0.2044	0.0750544	0.102232	0.0930928
13.4673	42.2501	0.492085	0.5	0.0873527	0.698682		13.4711	42.3629	0.00398026	0.5	0.861764	0.00192365
13.4673	42.2501	0.959332	0.0478341	0.0896448	0.942139		13.4694	42.3632	0.165027	0.339713	0.692507	0.143746
13.5065	42.2562	0.0122864	0.142191	0.914757	0.00269958		13.4689	42.3633	0.0258692	0.345438	0.176055	0.0632951
13.5096	42.2567	0.0221258	0.0111109	0.866876	0.029448		13.4664	42.3637	0.48443	0.416675	0.577558	0.323238
13.388	42.2378	0.0378489	0.5	0.95828	0.0353039		13.4632	42.3642	5.11024e-05	0.5	0.00527442	5.11987e-05
13.4132	42.2417	0.255249	0.132933	0.00846396	0.438813		13.4629	42.3642	0.479413	0.295655	0.542808	0.41793
13.4538	42.2481	0.931428	0.5	0.000714098	0.645745		13.4623	42.3643	0.0176712	0.5	0.00494565	0.0150967
13.4645	42.2497	0.119551	0.5	0.000111571	0.265746		13.4611	42.3645	0.35273	0.5	0.352059	0.38469
13.4668	42.2501	0.746638	0.42754	0.0105252	0.663209		13.4546	42.3656	7.95721e-09	0.0534563	0.383935	3.44747e-07
13.4668	42.2501	0.513846	0.175802	0.11447	0.594544		13.3598	42.3809	0.0206651	0.5	0.135444	0.0102185
13.4673	42.2502	0.511041	0.0887524	0.00955431	0.513607		13.476	42.3621	2.44553e-05	0.5	0.510346	0.000257226
13.489	42.2536	0.216047	0.314657	7.68085e-05	0.276278		13.4713	42.3628	0.88306	0.5	0.622625	0.921311
13.5096	42.2568	0.0445286	0.431568	0.167438	0.115813		13.4689	42.3632	0.144513	0.5	0.291509	0.251846
13.4132	42.2418	0.250283	0.2394	0.00159163	0.467954		13.4664	42.3636	0.458539	0.445968	0.18678	0.489265
13.4667	42.2501	0.171392	0.0372995	0.0117772	0.153456		13.4628	42.3642	0.260605	0.233124	0.59522	0.452804
13.4673	42.2502	0.556482	0.491961	0.000453167	0.577899		13.459	42.3648	0.0341917	0.5	0.239291	0.0197392
13.493	42.2542	0.986299	0.222508	0.0221166	0.561476		13.4305	42.3694	0.000447119	0.476738	0.645718	0.000729183
13.5062	42.2563	0.231742	0.5	0.511995	0.127457		13.345	42.3832	1.96967e-08	0.481768	0.876649	2.12074e-06
13.5082	42.2566	0.13445	0.0397971	0.00105907	0.333169		13.4759	42.3621	0.00393587	0.5	0.641504	0.0208045
13.5096	42.2568	0.221757	0.5	0.121532	0.611405		13.4689	42.3632	0.7382	0.5	0.364683	0.890007
13.5105	42.2569	0.755125	0.5	0.232443	0.922905		13.4664	42.3636	0.0387396	0.5	0.0411233	0.0255828
13.4668	42.2502	0.969079	0.0498826	0.0645058	0.680857		13.459	42.3648	0.0628271	0.5	0.795934	0.0504775
13.5082	42.2566	0.020432	0.0637356	0.00564014	0.0202007		13.4521	42.3659	0.000130697	0.260683	0.333692	0.000238117
13.5105	42.257	0.569727	0.196304	0.034356	1		13.4453	42.367	2.11292e-08	0.11712	0.291429	5.21698e-07
13.4084	42.2411	0.818438	0.5	0.0215845	0.980698		13.4305	42.3694	3.26054e-05	0.0119235	0.727746	5.56986e-05
13.4674	42.2503	0.642964	0.001	0.00378004	0.645745		13.345	42.3832	6.10086e-11	0.5	0.522121	2.79612e-07
13.4728	42.2511	0.0597428	0.14871	0.253102	0.0353039		13.4742	42.3623	0.417984	0.189785	0.805418	0.260114
13.3851	42.2375	0.0793347	0.0831147	0.0265687	0.0202007		13.4667	42.3635	0.00565964	0.173496	0.0812231	0.00146869
13.3939	42.2389	0.443628	0.15875	0.516842	0.217247		13.4667	42.3635	1.21755e-06	0.166732	0.0128076	1.74358e-06
13.4517	42.2479	0.801692	0.0337975	0.00207284	0.345397		13.4617	42.3643	0.000133879	0.327164	0.956415	0.000257226
13.4657	42.2501	0.301339	0.238891	0.0087527	0.790138		13.4603	42.3645	0.00134012	0.176424	0.888862	0.000437012
13.3851	42.2375	0.0333685	0.237834	0.323099	0.0312996		13.4521	42.3659	2.71431e-11	0.5	0.492023	8.96947e-09
13.3868	42.2378	0.0290676	0.5	0.306263	0.0202007		13.4453	42.367	1.01103e-09	0.0937451	0.617256	1.00792e-08
13.3873	42.2379	0.036704	0.167633	0.561611	0.0202007		13.434	42.3688	0.383947	0.5	0.019616	0.295056
13.3938	42.2389	0.0948539	0.183884	0.332838	0.00539783		13.4247	42.3703	6.08605e-10	0.366465	0.00948403	2.25642e-08
13.4499	42.2476	0.689961	0.314485	0.0404647	0.980698		13.4742	42.3623	0.0628439	0.253601	0.791792	0.0418588
13.4517	42.2479	0.834507	0.00105729	0.650095	0.235822		13.4707	42.3628	0.00213379	0.0425226	0.330286	0.00146869
13.4657	42.2501	0.223436	0.5	2.17096e-05	0.942139		13.4667	42.3635	0.00354476	0.5	0.366644	0.00304184
13.4676	42.2504	0.85257	0.064332	0.0487922	0.827629		13.4646	42.3638	0.209954	0.5	0.196024	0.260114
13.4506	42.2478	0.813354	0.5	0.0545875	1		13.4629	42.3641	0.0660449	0.405868	0.708674	0.0970055
13.4676	42.2504	0.253801	0.0548323	0.571224	0.357906		13.4617	42.3643	0.030255	0.446039	0.723025	0.0230865
13.5055	42.2563	0.324578	0.5	0.154015	0.333169		13.4603	42.3645	0.00142624	0.228692	0.247681	0.000323537
13.4506	42.2478	0.875136	0.5	0.0281713	0.827629		13.4578	42.3649	0.00122061	0.5	0.80783	0.00911101
13.4517	42.248	0.763505	0.0422056	0.0954525	0.513607		13.4529	42.3657	1.73782e-06	0.5	0.741622	5.51968e-06
13.3865	42.2379	0.0119847	0.237608	0.196093	0.00581407		13.4521	42.3658	9.02129e-08	0.416133	0.557282	8.68217e-07
13.4094	42.2414	0.176278	0.032075	0.286872	0.105022		13.452	42.3659	1.31585e-06	0.5	0.00772234	6.06121e-06
13.4506	42.2479	0.869208	0.439551	0.0463481	0.753127		13.4247	42.3703	3.14155e-11	0.5	0.0525254	7.09501e-09
13.3871	42.238	0.333848	0.5	0.337899	0.309564		13.3423	42.3835	0.0085541	0.5	0.341299	0.0076502
13.451	42.248	0.243705	0.0833992	0.233681	0.226399		13.338	42.3842	0.316201	0.339907	0.161119	0.406667
13.456	42.2487	0.601517	0.5	0.00118189	0.265746		13.4707	42.3628	0.00110979	0.134569	0.008318	0.000841254
13.4614	42.2496	0.0744032	0.00749606	3.83874e-06	0.0215387		13.4645	42.3638	0.178492	0.5	0.201884	0.313655
13.5065	42.2566	0.408402	0.5	4.47005e-06	0.827629		13.4644	42.3638	0.139552	0.5	0.0809537	0.192257
13.451	42.248	0.460314	0.28408	0.455214	0.903716		13.4629	42.3641	0.161638	0.386246	0.944321	0.199081
13.4614	42.2496	0.777669	0.40089	0.000115038	0.611405		13.4626	42.3641	0.891555	0.5	0.449881	0.827958
13.5065	42.2566	0.909917	0.236888	0.0361346	0.942139		13.4617	42.3642	0.0733077	0.133447	0.678624	0.0283093
13.3871	42.2381	0.277284	0.00910602	0.0555401	0.884583		13.4578	42.3649	0.951674	0.04525	0.272046	0.527251
13.389	42.2384	0.574228	0.0422912	0.857517	0.370697		13.4529	42.3657	3.59806e-06	0.478457	0.0291622	1.65543e-05
13.4088	42.2415	0.158087	0.0268422	0.00685998	0.0500316		13.4348	42.3686	3.73925e-06	0.00536647	0.862202	9.60237e-07
13.4506	42.248	0.324599	0.474864	0.351332	0.208365		13.3603	42.3806	0.0319391	0.16575	0.189713	0.0150967
13.451	42.248	0.784421	0.5	0.488542	0.453251		13.3447	42.3831	0.0423112	0.477733	0.14538	0.0930928
13.4678	42.2507	0.920859	0.017454	0.0201376	0.980698		13.3423	42.3835	0.0477655	0.5	0.0328644	0.0255828
13.5062	42.2566	0.424341	0.0107053	0.248308	0.716675		13.3381	42.3842	0.220624	0.5	0.0957016	0.213256
13.3871	42.2381	0.02986	0.198796	0.961666	0.0374648		13.4765	42.3618	0.448752	0.450001	0.731414	0.707382
13.389	42.2384	0.533226	0.0103203	0.600204	0.0659557		13.4683	42.3631	0.000130883	0.5	0.428584	4.32119e-05
13.4088	42.2415	0.00836366	0.394162	0.00497272	0.000451331		13.4644	42.3638	0.10555	0.5	0.0614555	0.295056
13.4512	42.2481	0.722938	0.20965	0.000671959	0.942139		13.4638	42.3639	0.350183	0.145788	0.689742	0.220611
13.4516	42.2482	0.783377	0.153473	0.239933	0.846528		13.4629	42.364	0.00114388	0.357166	0.483313	0.00103961
13.4637	42.25	0.229456	0.5	0.0416954	0.199748		13.4537	42.3655	0.0190005	0.353977	0.254174	0.00721214
13.4666	42.2505	0.903701	0.00229606	0.0248661	0.980698		13.4348	42.3686	9.84671e-06	0.11372	0.120995	1.65543e-05
13.5062	42.2567	0.00143036	0.00444823	0.0791099	0.000646496		13.4267	42.3699	2.48265e-08	0.324816	0.23136	2.79612e-07
13.5066	42.2567	0.228079	0.5	0.258316	0.357906		13.3423	42.3835	0.00132585	0.331936	0.424768	0.00128051
13.3871	42.2381	0.0733234	0.0060932	0.314747	0.0332502		13.3385	42.3841	0.198015	0.384285	0.398056	0.313655
13.3874	42.2382	0.0130018	0.350418	0.301917	0.0215387		13.4765	42.3618	0.050838	0.5	0.0294514	0.101049
13.4088	42.2415	0.341912	0.322924	0.0055884	0.226399		13.4707	42.3627	0.100519	0.0358088	0.104423	0.0753896
13.4533	42.2485	0.834582	0.5	0.0608203	0.771568		13.4684	42.3631	0.000120683	0.250579	0.440352	5.51968e-06
13.4637	42.2501	0.163538	0.350807	0.0742446	0.175465		13.4638	42.3638	0.0807644	0.5	0.547653	0.268569
13.4665	42.2505	0.906174	0.0388365	0.029088	0.611405		13.4536	42.3655	0.010907	0.5	0.540748	0.00368183
13.4937	42.2548	0.721632	0.5	0.0669769	0.628475		13.4523	42.3657	4.78622e-07	0.264166	0.960972	2.33757e-06
13.5046	42.2565	0.487132	0.189067	3.06759e-05	0.424642		13.4515	42.3658	4.96495e-10	0.5	0.482679	2.25642e-08
13.5062	42.2567	0.205651	0.0375035	0.449489	0.0950444		13.4348	42.3685	1.37228e-07	0.0779383	0.0902796	4.57229e-06
13.3874	42.2382	0.585168	0.195902	0.0966556	0.167881		13.4266	42.3698	5.29109e-08	0.329785	0.327198	1.19181e-07
13.3875	42.2382	0.77262	0.5	0.0818498	0.771568		13.426	42.3699	1.33299e-08	0.0299904	0.804602	2.51674e-07
13.4501	42.248	0.315695	0.0184	0.130709	0.146606		13.3419	42.3835	0.78997	0.5	0.695207	0.874416
13.4533	42.2485	0.758648	0.001	0.129246	0.467954		13.4707	42.3627	0.130151	0.20965	0.461967	0.032867
13.4665	42.2506	0.395575	0.0950088	0.0449121	0.235822		13.4684	42.3631	0.0103286	0.264239	0.903846	0.000969129
13.4667	42.2506	0.980356	0.0286194	0.0860189	0.942139		13.4678	42.3631	0.12045	0.234743	0.0299155	0.0970055
13.483	42.2531	0.0232822	0.172787	0.140922	0.0118645		13.467	42.3633	0.0472004	0.243885	0.160614	0.0438874
13.4937	42.2548	0.721014	0.336199	0.504999	0.961407		13.4638	42.3638	0.436931	0.5	0.190373	0.663821
13.5062	42.2567	0.0147727	0.5	0.514413	0.00581407		13.4515	42.3658	1.47834e-15	0.404169	0.0148644	5.411e-11
13.3869	42.2382	0.294669	0.370429	0.991089	0.287091		13.4348	42.3685	1.75448e-08	0.45373	0.797691	1.32763e-07
13.4501	42.248	0.370347	0.0342119	0.0165551	0.121526		13.426	42.3699	7.31783e-11	0.129702	0.488173	7.09501e-09
13.4663	42.2506	0.408291	0.0330152	0.0107753	0.199748		13.3391	42.3839	0.267123	0.352196	0.00905216	0.0753896
13.4667	42.2506	0.310249	0.0509763	0.0415941	0.199748		13.338	42.3841	0.662257	0.243092	0.326408	0.621368
13.4681	42.2508	0.348627	0.0783193	0.114188	0.167881		13.3379	42.3841	0.0903267	0.149648	0.158774	0.0481942
13.4142	42.2425	0.329656	0.5	0.110655	0.611405		13.4741	42.3621	0.820264	0.0130205	0.861762	0.607483
13.4558	42.249	0.464879	0.468555	0.00209108	0.513607		13.4671	42.3632	0.0397123	0.5	0.176731	0.0578773
13.4663	42.2506	0.174424	0.0372037	0.00305818	0.0260259		13.4671	42.3632	0.0498605	0.372593	0.292388	0.0528507
13.4667	42.2507	0.409099	0.32933	0.334808	0.577899		13.467	42.3632	0.0411793	0.5	0.0898845	0.0418588
13.494	42.2549	0.464356	0.0990148	0.162592	0.410743		13.4556	42.3651	4.55605e-07	0.5	0.282651	1.06161e-06
13.3894	42.2386	0.569862	0.0425064	0.42755	0.808829		13.4515	42.3658	1.44432e-15	0.5	0.0114173	6.17628e-11
13.4093	42.2418	0.0115141	0.235626	0.0687054	0.0500316		13.4348	42.3684	8.79158e-08	0.188982	0.919974	4.24412e-07
13.4537	42.2487	0.149077	0.5	0.278358	0.321225		13.3391	42.3839	0.0793333	0.127713	0.555638	0.101049
13.4557	42.249	0.390567	0.5	0.00301813	0.611405		13.4819	42.3608	0.0143958	0.5	0.461871	0.0553164
13.4667	42.2507	0.275585	0.5	0.140414	0.467954		13.4742	42.362	0.45534	0.5	0.206189	0.41793
13.494	42.255	0.97352	0.5	0.0631559	0.453251		13.467	42.3632	0.0415802	0.5	0.0508772	0.032867
13.4093	42.2418	0.0341031	0.0513516	0.0228368	0.0815173		13.4669	42.3632	0.0922451	0.5	0.235832	0.0722018
13.4557	42.249	0.922425	0.316413	8.7814e-06	0.357906		13.4626	42.3639	0.00268159	0.138177	0.902525	0.00157205
13.4666	42.2507	0.819896	0.016327	0.104361	0.513607		13.4535	42.3654	0.1416	0.198633	0.0211543	0.0345197
13.5023	42.2563	0.427396	0.157385	0.02601	0.663209		13.4526	42.3655	2.74335e-15	0.5	0.0870731	1.54249e-10
13.3856	42.2381	0.0706571	0.0935942	0.478264	0.0733997		13.4518	42.3657	3.07488e-07	0.130421	0.409991	1.38368e-05
13.3857	42.2381	0.102046	0.5	0.244376	0.110313		13.4513	42.3657	1.34587e-13	0.5	0.0222908	4.97729e-09
13.3894	42.2387	0.887792	0.403485	0.147727	1		13.3604	42.3804	0.02491	0.5	0.876613	0.0135277
13.408	42.2416	0.871555	0.0129603	0.152708	0.903716		13.3491	42.3822	0.419399	0.5	0.692778	0.593739
13.4089	42.2418	0.73349	0.0076865	0.650386	0.980698		13.345	42.3829	0.461269	0.5	0.0465389	0.37398
13.4389	42.2464	0.00285206	0.19925	0.182266	0.00129192		13.339	42.3839	0.976865	0.333625	0.806104	0.527251
13.4553	42.249	0.966135	0.30507	0.112047	0.680857		13.4742	42.362	0.0527751	0.0737302	0.783088	0.0283093
13.4557	42.2491	0.886495	0.5	0.00120813	0.370697		13.4689	42.3629	4.17055e-05	0.182188	0.0692229	7.77265e-05
13.4558	42.2491	0.65147	0.5	0.0207669	0.208365		13.467	42.3632	0.0108859	0.5	0.0213114	0.0177505
13.4937	42.255	0.0324498	0.41018	0.000314392	0.0446347		13.4603	42.3642	0.0334489	0.0201154	0.165974	0.00472537
13.5059	42.2569	0.0544449	0.5	0.97659	0.0500316		13.4534	42.3654	1.24928e-05	0.5	0.766285	4.70448e-05
13.3854	42.2381	0.068773	0.5	0.705661	0.0903485		13.4526	42.3655	1.27356e-12	0.5	0.373354	4.41918e-09
13.3855	42.2382	0.493627	0.00553999	0.54554	0.357906		13.4513	42.3657	2.17496e-16	0.5	0.000441656	3.17557e-11
13.3894	42.2388	0.321056	0.0911457	0.342854	0.298186		13.3604	42.3804	0.00260185	0.371467	0.769238	0.00285219
13.4389	42.2465	0.000313815	0.5	0.0385718	0.00010839		13.3491	42.3822	0.0802269	0.0764074	0.0192268	0.0438874
13.4525	42.2486	0.279401	0.5	0.658323	0.453251		13.3425	42.3833	0.77131	0.0526685	0.456012	0.937012
13.4553	42.249	0.980227	0.0321184	0.00101169	0.961407		13.339	42.3838	0.418	0.167253	0.00638343	0.268569
13.3854	42.2382	0.157956	0.5	0.0165342	0.115813		13.4836	42.3604	0.00769029	0.5	0.837178	0.0312825
13.3855	42.2382	0.335436	0.132885	0.283236	0.287091		13.4742	42.362	0.11574	0.222523	0.682871	0.13841
13.3873	42.2385	0.275111	0.0760228	0.845045	0.0773718		13.474	42.362	0.15321	0.0106868	0.713112	0.133227
13.4551	42.249	0.388769	0.214408	0.807645	0.287091		13.4603	42.3642	0.00184673	0.461338	0.0857779	0.000903096
13.4689	42.2512	0.430328	0.00767713	0.012272	0.0903485		13.4574	42.3647	8.60718e-07	0.276297	0.243471	2.33757e-06
13.4691	42.2512	0.0138749	0.351907	0.0321547	0.0215387		13.4534	42.3653	7.17494e-09	0.5	0.0022062	2.5756e-06
13.5036	42.2566	0.811058	0.361213	6.02729e-05	0.287091		13.4525	42.3655	8.2684e-13	0.347729	0.164397	7.09501e-09
13.3873	42.2385	0.125351	0.250073	0.367966	0.0472684		13.4513	42.3657	6.64409e-12	0.5	0.991039	3.47973e-09
13.4551	42.2491	0.536353	0.5	0.235376	0.410743		13.4337	42.3685	0.53364	0.5	0.177398	0.527251
13.4689	42.2512	0.0927537	0.0974328	0.216627	0.0312996		13.4249	42.3699	0.00839268	0.5	0.020256	0.00304184
13.505	42.2569	0.00328475	0.459619	0.167544	0.00269958		13.3604	42.3803	0.0763693	0.5	0.43452	0.123315
13.4475	42.2479	0.325556	0.00362065	0.00124728	0.321225		13.3491	42.3822	0.0261041	0.292013	0.0335746	0.0230865
13.5034	42.2566	0.00221067	0.5	0.889516	0.00500869		13.3401	42.3836	0.743208	0.5	0.138188	1
13.3856	42.2383	0.0199437	0.172442	0.0299742	0.00897711		13.339	42.3838	0.807354	0.5	0.0519068	0.984238
13.4689	42.2513	0.0966379	0.0707131	0.974648	0.0229532		13.4741	42.3619	0.0207058	0.303891	0.942573	0.0632951
13.5036	42.2567	0.846904	0.5	0.00354105	0.628475		13.474	42.362	0.0195643	0.428729	0.354721	0.0168237
13.5036	42.2567	0.222828	0.194957	0.0579298	0.0312996		13.4574	42.3646	2.33884e-08	0.47895	0.0686344	1.32763e-07
13.5048	42.2569	0.640437	0.5	0.00562209	0.663209		13.4574	42.3647	0.000897572	0.324829	0.256136	0.000545433
13.3856	42.2383	0.0797722	0.193048	0.830484	0.0155472		13.4544	42.3651	0.000153628	0.5	0.0204784	0.000277766
13.4539	42.249	0.736045	0.5	3.81093e-05	0.255494		13.4525	42.3654	4.83138e-12	0.0235671	0.131028	1.42697e-08
13.468	42.2512	0.108357	0.5	0.919097	0.0446347		13.4337	42.3685	0.363278	0.300063	0.185373	0.33301
13.469	42.2514	0.0480825	0.370656	0.0378381	0.0472684		13.3401	42.3836	0.53222	0.5	0.323904	0.812596
13.5048	42.2569	0.189228	0.5	0.00677033	0.217247		13.34	42.3836	0.757145	0.5	0.138583	0.812596
13.3849	42.2383	0.266173	0.19848	0.10406	0.0999338		13.3393	42.3837	0.905175	0.5	0.370358	0.952737
13.3865	42.2385	0.017872	0.0845272	0.00140244	0.00464509		13.4742	42.3619	0.0489351	0.462117	0.862246	0.0459983
13.4693	42.2514	0.646465	0.307262	0.0195982	0.846528		13.4741	42.3619	4.10663e-05	0.5	0.594103	0.000238117
13.4935	42.2552	0.121631	0.324933	0.59604	0.191395		13.474	42.3619	0.00031844	0.0110834	0.0989512	0.000203827
13.3849	42.2383	0.00965187	0.0672609	0.397608	0.00100063		13.4683	42.3628	1.01293e-11	0.5	0.98834	3.16915e-08
13.3863	42.2385	0.0623085	0.0166412	0.125893	0.00724201		13.4574	42.3646	2.33696e-07	0.260532	0.301341	8.68217e-07
13.4687	42.2514	0.214197	0.388995	0.0131679	0.146606		13.34	42.3835	0.162971	0.5	0.00392901	0.128197
13.4693	42.2515	0.97814	0.179118	0.0173655	0.513607		13.3393	42.3837	0.0271909	0.5	0.0473102	0.0821098
13.4934	42.2552	0.0207463	0.5	0.473328	0.0229532		13.4741	42.3619	0.216431	0.5	0.945128	0.406667
13.5028	42.2567	0.102777	0.264811	0.107985	0.160546		13.4683	42.3628	8.1913e-08	0.5	0.223679	5.51968e-06
13.3864	42.2386	0.000435095	0.14598	0.296206	0.000646496		13.4665	42.3631	0.0337561	0.5	0.159482	0.029764
13.3864	42.2386	0.0163506	0.0738616	0.00985665	0.00180242		13.4575	42.3646	0.000463473	0.0772497	0.283162	8.44009e-05
13.4067	42.2418	0.151046	0.5	0.348925	0.115813		13.4573	42.3646	0.000125507	0.5	0.22088	0.000137286
13.454	42.2491	0.411941	0.258692	0.00308503	0.383768		13.455	42.365	1.60892e-05	0.130547	0.904853	7.15534e-05
13.4687	42.2514	0.8759	0.0158328	0.150686	0.438813		13.3393	42.3836	0.029651	0.397941	0.136704	0.0821098
13.5035	42.2569	0.0119958	0.392789	0.246304	0.00581407		13.483	42.3604	0.105835	0.5	0.93523	0.179128
13.5073	42.2574	0.562275	0.210376	0.409476	0.482917		13.474	42.3618	0.221407	0.5	0.0519957	0.199081
13.3858	42.2385	0.141768	0.333747	0.0136936	0.0312996		13.4716	42.3622	0.0120006	0.5	0.578514	0.0187217
13.3865	42.2386	0.53351	0.346093	0.0263674	0.545283		13.4641	42.3635	0.299055	0.0654734	0.00581687	0.722127
13.4562	42.2495	0.0284396	0.118717	0.370254	0.00464509		13.463	42.3636	0.027564	0.00133945	0.148185	0.000586819
13.4655	42.251	0.428754	0.0114624	0.0183484	0.183302		13.4582	42.3644	1.319e-08	0.285145	0.418497	7.84719e-07
13.4687	42.2515	0.32649	0.0554928	0.111593	0.0858411		13.4575	42.3645	1.76695e-07	0.5	0.130319	2.79612e-07
13.5035	42.2569	0.23696	0.342384	0.0620701	0.139993		13.455	42.3649	5.68339e-05	0.166028	0.982039	4.70448e-05
13.5042	42.257	0.0052603	0.5	0.241383	0.0135961		13.4521	42.3654	3.75114e-09	0.5	0.0189031	9.59348e-08
13.5053	42.2572	0.148042	0.5	0.00578277	0.199748		13.3453	42.3826	7.46015e-06	0.5	0.604639	5.56986e-05
13.5073	42.2575	0.949628	0.5	0.0120201	1		13.3442	42.3828	0.504439	0.5	0.315046	0.827958
13.3859	42.2386	0.0275129	0.370873	0.000231313	0.0135961		13.343	42.383	0.539937	0.480517	0.700109	0.363456
13.3874	42.2388	0.156662	0.298374	0.389251	0.146606		13.3429	42.383	0.520537	0.5	0.415347	0.766964
13.4553	42.2494	0.671379	0.47883	0.0161489	0.333169		13.3419	42.3832	0.545963	0.0954888	0.19869	0.736976
13.4655	42.251	0.228796	0.0113921	0.569738	0.0421259		13.4769	42.3613	0.0544335	0.5	0.370992	0.0481942
13.4905	42.2549	0.186568	0.125847	0.0132028	0.424642		13.4716	42.3622	0.715708	0.5	0.396617	0.827958
13.5035	42.2569	0.571605	0.153055	0.076614	0.482917		13.4686	42.3627	0.00166684	0.348408	0.0938636	0.00368183
13.5053	42.2572	0.15229	0.5	0.00665125	0.167881		13.464	42.3634	0.334456	0.390436	0.0183175	0.363456
13.5073	42.2575	0.0143658	0.5	0.165325	0.0229532		13.463	42.3636	0.0119253	0.0144777	0.601811	0.00219672
13.4553	42.2494	0.75537	0.246587	0.00231941	0.357906		13.4582	42.3644	1.13232e-09	0.0470021	0.230401	3.16915e-08
13.4569	42.2497	0.671884	0.00330537	0.01667	0.498136		13.4575	42.3645	2.31156e-08	0.286607	0.0154005	1.06948e-07
13.4684	42.2515	3.9477e-06	0.0846412	0.446107	1.33143e-05		13.4549	42.3649	5.40804e-07	0.375903	0.450919	2.5756e-06
13.4691	42.2516	0.220582	0.168336	0.361133	0.208365		13.452	42.3654	2.18919e-09	0.0205854	0.469534	1.13219e-08
13.4905	42.2549	0.449603	0.023687	0.00201997	0.808829		13.4489	42.3659	1.6265e-07	0.5	0.422052	4.70637e-07
13.5036	42.257	0.868569	0.0959587	0.57043	0.961407		13.3453	42.3826	0.00399043	0.5	0.216525	0.0060298
13.5072	42.2575	0.438086	0.092953	0.679472	0.498136		13.3443	42.3827	0.079094	0.173916	0.665841	0.0786913
13.5072	42.2575	0.00544474	0.234295	0.0533759	0.0135961		13.343	42.383	0.021117	0.5	0.0214444	0.0121047
13.4558	42.2496	0.896977	0.414773	0.0117361	0.808829		13.4692	42.3626	0.148481	0.139892	0.743875	0.123315
13.4676	42.2514	0.603192	0.0320484	0.349727	0.753127		13.4692	42.3626	0.647434	0.273567	0.5867	0.736976
13.4684	42.2515	0.0255871	0.0246246	0.544486	0.00430555		13.4686	42.3626	0.0328491	0.410916	0.0116953	0.0481942
13.4691	42.2516	0.337587	0.150019	0.0080353	0.453251		13.4582	42.3643	2.37207e-07	0.282746	0.471699	6.65336e-06
13.4849	42.2541	0.23581	0.361966	0.000333429	0.0624738		13.458	42.3644	0.263751	0.148238	0.389481	0.0438874
13.4905	42.255	0.69836	0.001	0.000894588	0.24552		13.4575	42.3644	4.33261e-05	0.227059	0.577197	2.16023e-05
13.5061	42.2574	0.10115	0.00688383	0.163801	0.0260259		13.452	42.3653	1.02855e-10	0.24948	0.437209	1.60108e-08
13.5071	42.2576	0.478158	0.478338	0.0720164	0.561476		13.4488	42.3658	5.70148e-08	0.5	0.0646633	8.68217e-07
13.4496	42.2486	0.448951	0.397357	0.176575	0.397117		13.3602	42.3801	0.0252567	0.5	0.854039	0.032867
13.4496	42.2486	0.606842	0.202312	0.334923	0.865516		13.3433	42.3829	0.000254148	0.5	0.0178773	0.000545433
13.4529	42.2491	0.597418	0.419553	0.954087	0.577899		13.3418	42.3831	0.135308	0.291466	0.0544074	0.0418588
13.4558	42.2496	0.94192	0.5	0.0151144	0.790138		13.3388	42.3836	0.68169	0.5	0.659182	0.766964
13.4565	42.2497	0.869029	0.5	0.0196505	0.865516		13.4691	42.3625	0.970007	0.5	0.399301	0.890007
13.4614	42.2505	0.924224	0.352246	6.13289e-05	0.505841		13.4688	42.3626	0.0367122	0.5	0.612288	0.0578773
13.5019	42.2568	0.406619	0.434124	0.0248793	0.160546		13.4641	42.3633	0.0801202	0.00163881	0.828205	0.0753896
13.506	42.2574	0.971512	0.5	0.471889	0.594544		13.4617	42.3637	0.0440754	0.291482	0.0973555	0.032867
13.5061	42.2574	0.0193459	0.395901	0.679278	0.0374648		13.4582	42.3643	5.26371e-05	0.193838	0.0578969	6.05715e-05
13.3849	42.2386	0.10704	0.398099	0.172535	0.0229532		13.458	42.3643	0.840517	0.389301	0.767109	0.304261
13.387	42.2389	0.322132	0.445773	0.0209087	0.321225		13.4575	42.3644	2.51652e-09	0.256737	0.147654	1.60108e-08
13.3871	42.2389	0.373892	0.336563	0.261358	0.276278		13.4508	42.3655	1.0525e-05	0.235149	0.840689	1.26432e-05
13.3873	42.2389	0.711875	0.102581	0.014702	0.255494		13.4204	42.3704	2.25607e-11	0.5	0.322758	7.09501e-09
13.4496	42.2487	0.706984	0.208653	0.129484	0.771568		13.3448	42.3826	0.227679	0.252599	0.0705781	0.0930928
13.4528	42.2492	0.617087	0.0268832	0.742482	0.438813		13.3448	42.3826	0.00234978	0.182032	0.167754	0.0026734
13.4565	42.2497	0.813833	0.5	0.0282649	1		13.3433	42.3828	0.000127962	0.5	0.567455	0.000148687
13.4683	42.2516	0.00209362	0.00187801	0.000224413	0.000771198		13.3388	42.3836	0.400052	0.5	0.822439	0.118579
13.5061	42.2575	0.0710254	0.5	0.13925	0.121526		13.4691	42.3625	0.955549	0.5	0.134947	0.663821
13.3872	42.239	0.187669	0.366559	0.984838	0.0815173		13.4688	42.3625	0.563278	0.287641	0.25422	0.921311
13.3873	42.239	0.0208733	0.5	0.0601326	0.00500869		13.4669	42.3628	2.38917e-05	0.5	0.00563656	0.000126711
13.3879	42.2391	0.662601	0.0214123	0.913482	0.808829		13.4641	42.3633	0.851862	0.5	0.111353	0.858873
13.4539	42.2494	0.147324	0.5	0.0294448	0.235822		13.4616	42.3637	0.251376	0.5	0.0887435	0.192257
13.4539	42.2494	0.179669	0.076986	0.229286	0.175465		13.4606	42.3639	0.00151753	0.258797	0.437074	0.000299834
13.4544	42.2495	0.939564	0.5	0.338638	0.808829		13.4575	42.3644	3.07869e-08	0.275954	0.00925396	4.43591e-08
13.4563	42.2498	0.0403613	0.5	0.239542	0.0260259		13.4204	42.3704	1.00861e-06	0.00537177	0.0123647	9.60237e-07
13.4584	42.2501	0.615872	0.00328887	0.103005	0.265746		13.3448	42.3825	0.0229682	0.0277676	0.141502	0.00137163
13.4683	42.2516	1.22746e-05	0.337104	0.000224933	4.81254e-05		13.3422	42.383	0.578049	0.5	0.163638	0.395586
13.3872	42.239	0.032446	0.342598	0.0932688	0.052929		13.3387	42.3835	0.388143	0.221809	0.156016	0.295056
13.3873	42.239	0.325761	0.0246732	0.833502	0.160546		13.4826	42.3603	0.0171175	0.5	0.00957421	0.0345197
13.3875	42.2391	0.0638807	0.394107	0.421014	0.0659557		13.4683	42.3626	0.3564	0.330811	0.0799124	0.38469
13.3879	42.2391	0.0796624	0.00846152	0.39536	0.110313		13.4682	42.3626	0.381449	0.150576	0.201766	0.0930928
13.4381	42.247	0.458339	0.468984	0.559576	0.529325		13.4669	42.3628	9.21826e-07	0.5	0.0625713	2.12074e-06
13.4502	42.2488	0.374992	0.447582	0.00139252	0.160546		13.4641	42.3633	0.26469	0.0403702	0.870967	0.133227
13.4505	42.2489	0.89461	0.355042	0.00581609	0.846528		13.4616	42.3637	0.233305	0.195602	0.147587	0.27721
13.4563	42.2498	0.00199446	0.422227	0.56531	0.000494165		13.4616	42.3637	3.78676e-05	0.36857	0.443594	0.000238117
13.4683	42.2517	4.76235e-12	0.5	0.00106139	3.70013e-10		13.4611	42.3638	1.32075e-05	0.109994	0.524675	5.02465e-06
13.3871	42.239	0.923359	0.166043	0.0127651	0.716675		13.4606	42.3638	0.00657729	0.0208356	0.156842	0.000323537
13.3874	42.2391	0.000960696	0.0970208	0.759464	0.000284453		13.4536	42.365	0.0112102	0.414652	0.0700591	0.0076502
13.4508	42.249	0.078187	0.24243	0.105975	0.0446347		13.4517	42.3653	5.82998e-12	0.5	0.379764	4.97729e-09
13.4564	42.2498	0.657955	0.0095698	0.0101133	0.922905		13.3448	42.3825	0.00148534	0.0650993	0.528963	0.000678503
13.4632	42.2509	0.682545	0.330754	0.0135878	0.529325		13.3448	42.3825	0.000543275	0.5	0.214587	0.000969129
13.5045	42.2573	0.356863	0.0108869	0.000705469	0.309564		13.3442	42.3826	0.14144	0.0106027	0.329795	0.149239
13.3874	42.2391	0.120098	0.32213	0.600987	0.127457		13.3422	42.3829	0.562155	0.5	0.103094	0.33301
13.4495	42.2488	0.528718	0.0627892	0.00704409	0.680857		13.4826	42.3602	0.20529	0.5	0.033274	0.353119
13.4563	42.2499	0.404267	0.0096176	0.022429	0.663209		13.4703	42.3622	0.0660864	0.412615	0.860972	0.0930928
13.5057	42.2576	0.223696	0.5	0.110641	0.467954		13.4691	42.3624	0.934946	0.0103366	0.339544	1
13.4407	42.2475	0.0847227	0.0470356	0.00125651	0.191395		13.4683	42.3625	0.000211165	0.324638	0.653288	0.000470691
13.4635	42.251	0.855438	0.288496	0.00150164	0.226399		13.4682	42.3626	0.335236	0.00976888	0.0705558	0.0504775
13.4685	42.2518	0.000458506	0.421994	7.75801e-05	0.000451331		13.4646	42.3631	0.212265	0.320992	0.442989	0.220611
13.4407	42.2475	0.688521	0.0163884	0.00031363	0.133611		13.4643	42.3632	0.0849843	0.5	0.456873	0.0481942
13.4565	42.25	0.263442	0.0970789	0.000667628	0.199748		13.4575	42.3643	1.91956e-07	0.125073	0.103239	9.59348e-08
13.4612	42.2507	0.944934	0.133244	5.03084e-05	0.753127		13.4536	42.3649	1.09605e-08	0.5	0.00706303	2.51674e-07
13.4634	42.2511	0.890156	0.0446294	7.45257e-05	0.133611		13.4517	42.3652	8.20254e-07	0.182015	0.124303	2.12074e-06
13.4682	42.2518	2.47529e-05	0.085009	0.00407916	1.65868e-05		13.4216	42.3701	0.00827742	0.0235838	0.400035	0.00168207
13.5092	42.2582	0.0589815	0.368806	0.0270549	0.370697		13.3442	42.3826	2.78351e-06	0.5	0.47266	8.78032e-06
13.4524	42.2494	0.159915	0.254181	0.0454824	0.110313		13.3421	42.3829	0.432708	0.5	0.44376	0.353119
13.4612	42.2507	0.625031	0.188759	0.000838391	0.663209		13.4744	42.3615	0.53776	0.5	0.397395	0.37398
13.4682	42.2518	1.69408e-07	0.376929	0.0105517	2.68456e-06		13.4734	42.3617	0.00930407	0.5	0.615295	0.0127987
13.5092	42.2582	0.00293108	0.5	0.0968448	0.00963304		13.4703	42.3622	0.00374755	0.301133	0.392302	0.0114442
13.3866	42.2391	0.444376	0.0961596	0.121875	0.397117		13.4677	42.3626	0.000187415	0.5	0.178745	0.00205603
13.4542	42.2497	0.340972	0.0707401	0.0639691	0.121526		13.4662	42.3628	0.0212207	0.5	0.0461072	0.0481942
13.4562	42.25	0.956922	0.5	0.288417	0.808829		13.4646	42.3631	0.193835	0.0902202	0.708321	0.133227
13.501	42.257	0.0234012	0.5	0.137415	0.0815173		13.4643	42.3632	0.388725	0.32803	0.975756	0.41793
13.5041	42.2575	0.0249412	0.5	0.909352	0.0659557		13.4517	42.3652	6.30897e-10	0.5	0.000862116	6.18784e-08
13.5042	42.2575	0.197214	0.001	0.0207778	0.0135961		13.4215	42.3701	1.29047e-05	0.452484	0.219543	8.00787e-06
13.5092	42.2582	0.000126526	0.154613	0.0800564	0.00152764		13.421	42.3702	7.83064e-09	0.265298	0.771516	4.24412e-07
13.3844	42.2388	0.360483	0.232893	0.176717	0.226399		13.3595	42.3801	1.09513e-05	0.00419101	0.718601	1.65543e-05
13.3866	42.2392	0.438434	0.0840592	0.408761	0.808829		13.3586	42.3802	0.0174477	0.00947319	0.655815	0.00392096
13.4563	42.25	0.178003	0.5	0.539228	0.183302		13.3529	42.3811	0.000792189	0.5	0.933159	0.0142932
13.501	42.257	0.00368932	0.5	0.269965	0.0135961		13.342	42.3829	0.894085	0.5	0.340758	0.921311
13.3844	42.2389	0.167794	0.0536154	0.640428	0.0353039		13.3387	42.3834	0.357972	0.248456	0.0342371	0.199081
13.3866	42.2392	0.628606	0.129603	0.587482	0.498136		13.4744	42.3615	0.759641	0.420791	0.771314	0.566686
13.3866	42.2392	0.730625	0.5	0.520085	0.628475		13.4742	42.3615	0.000666738	0.5	0.232361	0.000348985
13.4548	42.2499	0.631872	0.314509	0.264931	0.424642		13.474	42.3615	7.59722e-05	0.416269	0.0047442	0.00567637
13.5061	42.2578	0.00948282	0.5	0.417311	0.0421259		13.4703	42.3621	0.0221669	0.5	0.443666	0.0504775
13.3844	42.2389	0.735955	0.136245	0.644795	0.513607		13.4692	42.3623	0.0998122	0.459245	0.86747	0.0970055
13.3864	42.2392	0.959164	0.0127804	0.124607	0.577899		13.4677	42.3626	0.0534897	0.260049	0.646577	0.0269163
13.3866	42.2392	0.48042	0.019803	0.00526096	0.482917		13.4677	42.3626	6.92047e-07	0.303687	0.0308911	7.08984e-07
13.3866	42.2393	0.678387	0.299847	0.0294583	0.513607		13.4667	42.3627	0.00290051	0.5	0.0626079	0.0060298
13.4412	42.2478	0.388501	0.5	0.0114504	0.139993		13.4663	42.3628	0.280197	0.452623	0.0813763	0.38469
13.4527	42.2496	0.97623	0.322611	1.2253e-05	0.961407		13.4643	42.3631	0.574029	0.41973	0.689082	0.452804
13.5061	42.2579	0.0109958	0.5	0.115522	0.0189358		13.4591	42.364	3.33763e-08	0.5	0.152475	1.17324e-06
13.3864	42.2392	0.552773	0.0402078	0.00556701	0.208365		13.4576	42.3642	1.0756e-10	0.5	0.800188	8.96947e-09
13.3866	42.2393	0.376422	0.0379731	0.0226564	0.561476		13.4547	42.3647	6.92743e-07	0.31072	0.107549	2.5756e-06
13.4548	42.2499	0.261802	0.0304722	0.338068	0.309564		13.4528	42.365	6.69097e-07	0.110389	0.186412	1.58006e-06
13.4624	42.2511	0.639223	0.5	0.000757844	0.903716		13.4508	42.3653	6.48269e-09	0.263063	0.00340837	3.44747e-07
13.4859	42.2548	0.868345	0.5	0.230263	0.903716		13.4334	42.3681	1.36681e-11	0.0426521	0.921787	3.47973e-09
13.5061	42.2579	0.00721854	0.0346792	0.00349384	0.00897711		13.4334	42.3681	1.00934e-07	0.176173	0.592049	1.17324e-06
13.5081	42.2582	0.0632406	0.0745021	0.000114126	0.0591452		13.4213	42.3701	0.000197699	0.0513729	0.696286	8.44009e-05
13.5082	42.2582	0.00819158	0.471177	0.0508491	0.110313		13.4209	42.3701	9.01471e-12	0.344533	0.135514	4.97729e-09
13.3866	42.2393	0.371598	0.105488	0.338116	0.628475		13.3421	42.3828	0.000947939	0.5	0.212516	0.00146869
13.4136	42.2435	0.856935	0.45951	0.511295	0.884583		13.3387	42.3834	0.591042	0.299448	0.0576004	0.678225
13.4318	42.2464	0.874534	0.5	0.217411	0.753127		13.4742	42.3615	0.408176	0.5	0.285542	0.441001
13.4525	42.2496	0.853349	0.159637	4.19748e-05	0.790138		13.474	42.3615	6.14482e-06	0.167844	0.00203415	7.77265e-05
13.4547	42.25	0.535772	0.00254143	0.934499	0.884583		13.4713	42.3619	0.00669225	0.5	0.90298	0.0187217
13.456	42.2501	0.395545	0.00170082	0.0307358	0.24552		13.4703	42.3621	0.789004	0.147885	0.578673	0.751923
13.4624	42.2511	0.410992	0.5	2.17121e-06	0.942139		13.4692	42.3623	0.0130387	0.114824	0.190121	0.00392096
13.4682	42.2521	1.40792e-05	0.5	0.0913315	2.55697e-05		13.467	42.3626	0.752599	0.0408286	0.376374	0.905641
13.5001	42.257	0.00812132	0.5	0.000664061	0.00724201		13.4667	42.3627	2.67126e-05	0.5	0.692569	0.000506779
13.5081	42.2583	0.0340918	0.5	0.0276532	0.0858411		13.4632	42.3633	6.10139e-05	0.294488	0.754894	5.11987e-05
13.5082	42.2583	0.0189257	0.5	0.0518738	0.146606		13.4632	42.3633	0.00027584	0.438987	0.363624	0.000174216
13.5102	42.2586	0.00278628	0.5	0.161175	0.00430555		13.4612	42.3636	0.00126354	0.00891212	0.33223	0.000586819
13.4317	42.2464	0.459016	0.208337	0.113773	0.545283		13.4591	42.3639	4.66708e-11	0.0148495	0.498214	1.00792e-08
13.4525	42.2496	0.599375	0.00752532	0.000138382	0.498136		13.4576	42.3642	3.92496e-09	0.5	0.263465	6.18784e-08
13.456	42.2502	0.304326	0.182028	0.0708989	0.309564		13.4547	42.3646	2.71484e-08	0.5	0.188356	4.24412e-07
13.4648	42.2516	0.922458	0.5	0.00985805	0.942139		13.4539	42.3648	2.90888e-09	0.399836	0.172941	1.64559e-07
13.4649	42.2516	0.915353	0.258442	0.0627319	0.990348		13.4523	42.365	1.31843e-11	0.412743	0.491606	2.42443e-09
13.4849	42.2547	0.0545073	0.0830318	0.487531	0.0229532		13.4508	42.3653	6.51466e-11	0.5	0.28462	3.92217e-09
13.5001	42.2571	3.3271e-05	0.282723	0.402074	5.33703e-05		13.4334	42.3681	1.97321e-10	0.100229	0.258277	3.5464e-08
13.5037	42.2576	2.61664e-08	0.176471	0.00743388	1.02281e-07		13.4333	42.3681	4.73933e-09	0.5	0.561946	2.03661e-07
13.4559	42.2502	0.490537	0.290477	0.32664	0.265746		13.4213	42.37	5.25638e-09	0.305483	0.741622	1.64559e-07
13.4561	42.2502	0.0794252	0.382231	0.0565091	0.0260259		13.4212	42.37	6.07154e-11	0.5	0.449365	2.01333e-08
13.4627	42.2513	0.495221	0.251698	0.000161332	0.513607		13.3588	42.3801	0.0495006	0.5	0.351654	0.0691253
13.4648	42.2516	0.00919492	0.5	0.63537	0.00369312		13.3453	42.3823	0.356191	0.347687	0.398719	0.38469
13.3842	42.2391	0.121762	0.0223619	0.186852	0.370697		13.3422	42.3828	6.93953e-05	0.5	0.165471	0.000729183
13.454	42.25	0.455995	0.474124	0.0450037	0.397117		13.3386	42.3834	0.00639338	0.287155	0.674703	0.00168207
13.4626	42.2513	0.288008	0.145491	3.61015e-05	0.734826		13.3386	42.3834	0.291177	0.457418	0.0388357	0.185607
13.4651	42.2517	0.428027	0.0629701	0.000523882	0.467954		13.4819	42.3602	0.000197255	0.467563	0.22994	0.00417411
13.4852	42.2548	0.436294	0.2793	0.496292	0.410743		13.4744	42.3614	0.00343062	0.0774563	0.258823	0.00534173
13.454	42.25	0.398404	0.416892	0.00991846	0.438813		13.4713	42.3619	0.0376984	0.5	0.605874	0.0399101
13.384	42.2391	0.243726	0.449382	0.27147	0.183302		13.4692	42.3622	0.0269305	0.5	0.145676	0.0208045
13.454	42.25	0.736678	0.100969	0.162431	0.790138		13.4683	42.3624	0.0453383	0.0404171	0.647975	0.00965058
13.384	42.2391	0.627798	0.00590142	0.223841	0.139993		13.4632	42.3632	1.48429e-06	0.0648635	0.926699	2.12074e-06
13.454	42.2501	0.785539	0.00736048	0.0767433	0.410743		13.4612	42.3635	6.73183e-06	0.5	0.0531718	5.56986e-05
13.4636	42.2516	0.394118	0.0790027	0.0019683	0.255494		13.4584	42.364	8.36515e-10	0.168091	0.428657	8.96947e-09
13.5101	42.2588	0.0575542	0.0463552	0.408337	0.0118645		13.4547	42.3646	4.60404e-06	0.286075	0.966247	1.80968e-05
13.4571	42.2506	0.209409	0.001	0.0630105	0.345397		13.4542	42.3647	3.46264e-10	0.00633974	0.598852	2.73582e-09
13.4992	42.2571	0.00260482	0.5	0.230854	0.00152764		13.4539	42.3647	8.1364e-08	0.144576	0.600008	5.78081e-07
13.4993	42.2572	0.00262403	0.001	0.563593	0.000771198		13.4523	42.365	3.22236e-08	0.5	0.571427	1.47836e-07
13.5067	42.2583	0.0286153	0.5	0.278003	0.183302		13.4334	42.368	8.74416e-08	0.321494	0.865401	7.71058e-08
13.5068	42.2583	0.00314139	0.259368	0.385415	0.00195622		13.4211	42.37	8.12607e-08	0.0448878	0.54893	1.83103e-07
13.5101	42.2588	0.00118566	0.38501	0.805469	0.00152764		13.4052	42.3726	5.79009e-05	0.5	0.260286	0.000188476
13.3843	42.2393	0.164668	0.341781	0.119049	0.0559653		13.3588	42.3801	0.00306347	0.5	0.717193	0.00324292
13.4571	42.2506	0.747478	0.0159906	0.00174124	0.961407		13.3586	42.3801	0.000761788	0.285697	0.189986	0.000160976
13.4992	42.2572	0.0455279	0.5	0.285258	0.0189358		13.3472	42.3819	0.150677	0.00440985	0.720219	0.109537
13.4993	42.2572	0.114176	0.00720696	0.0702879	0.0135961		13.3453	42.3822	0.307324	0.5	0.906515	0.566686
13.5068	42.2584	0.00157695	0.5	0.880495	0.00230054		13.3386	42.3833	0.0264084	0.5	0.0254333	0.0150967
13.466	42.252	0.43522	0.00499224	0.00505545	0.298186		13.4839	42.3598	0.189363	0.5	0.326411	0.213256
13.5068	42.2584	0.00107844	0.347204	0.104274	0.000706294		13.4832	42.36	0.0311178	0.0410912	0.731039	0.060536
13.4499	42.2496	0.776292	0.0927934	0.0481375	0.160546		13.4769	42.361	0.810853	0.468858	0.21449	0.921311
13.4629	42.2516	0.899174	0.5	0.148974	0.865516		13.4734	42.3615	0.0049164	0.0719483	0.635315	0.00205603
13.4629	42.2516	0.976673	0.268833	0.566923	0.865516		13.4697	42.3621	0.0460194	0.0342852	0.21434	0.0399101
13.5068	42.2584	0.040469	0.5	0.0432701	0.0332502		13.4693	42.3622	0.193556	0.323486	0.444292	0.213256
13.4405	42.2482	0.766218	0.31109	0.0852551	0.645745		13.4666	42.3626	0.219772	0.452374	0.595374	0.41793
13.4629	42.2516	0.835852	0.200558	0.293602	0.594544		13.464	42.3631	0.0216234	0.5	0.474771	0.0168237
13.4629	42.2516	0.49955	0.333371	0.575622	0.594544		13.4631	42.3632	4.40367e-05	0.158165	0.0312165	4.32119e-05
13.5068	42.2585	0.200246	0.5	0.127724	0.287091		13.4589	42.3639	1.7893e-05	0.5	0.867819	3.96764e-05
13.507	42.2585	0.00325401	0.115422	0.0529414	0.00165981		13.4584	42.364	1.21459e-09	0.0652187	0.202704	1.00792e-08
13.507	42.2585	0.0192226	0.318697	0.508872	0.0189358		13.4542	42.3646	7.43434e-09	0.316154	0.0602808	2.83096e-08
13.3837	42.2393	0.868638	0.208248	0.360494	0.961407		13.4506	42.3652	2.82038e-09	0.373029	0.48208	2.51674e-07
13.4378	42.2478	0.355754	0.00789567	0.274161	0.383768		13.4052	42.3726	0.000130567	0.5	0.137264	2.57483e-05
13.4498	42.2497	0.768814	0.220619	0.263777	0.865516		13.3586	42.3801	1.9138e-05	0.5	0.224521	3.06442e-05
13.4648	42.252	0.4369	0.5	0.349157	0.467954		13.3472	42.3819	0.328368	0.5	0.862151	0.295056
13.5047	42.2582	0.132075	0.11772	0.292873	0.0773718		13.3453	42.3822	0.72765	0.5	0.818905	0.621368
13.507	42.2586	0.783199	0.0869434	0.0398613	0.698682		13.3428	42.3826	0.0590718	0.5	0.875756	0.0243069
13.3843	42.2395	0.926569	0.5	0.0336507	0.884583		13.4828	42.36	0.00673122	0.5	0.000983493	0.0219197
13.4498	42.2497	0.96744	0.159931	0.000363923	0.482917		13.4769	42.3609	0.457549	0.245998	0.520982	0.707382
13.4646	42.252	0.701192	0.140132	0.0268583	0.191395		13.4738	42.3614	0.567086	0.5	0.0138133	0.607483
13.4648	42.252	0.120795	0.5	0.135797	0.199748		13.4734	42.3615	0.445834	0.265693	0.194907	0.295056
13.4978	42.2572	0.105361	0.5	0.727746	0.133611		13.4697	42.3621	0.141996	0.5	0.407048	0.0786913
13.4978	42.2572	0.117564	0.381005	0.120032	0.153456		13.4693	42.3622	0.0398494	0.139236	0.6216	0.0459983
13.3867	42.2399	0.389432	0.001	0.830971	0.276278		13.4665	42.3626	0.578516	0.451465	0.00551868	0.464785
13.4502	42.2498	0.482783	0.5	0.260392	0.577899		13.464	42.363	0.208928	0.232323	0.889694	0.160702
13.4629	42.2518	0.332991	0.5	0.234037	0.199748		13.4618	42.3634	0.0291896	0.41282	0.052059	0.0821098
13.4631	42.2519	0.537121	0.248499	0.00533278	0.0950444		13.4589	42.3638	1.307e-07	0.16847	0.112727	4.9583e-08
[truncated: 50,717 more rows]
